# Supplementary material for: Identification and characterization of known and novel microRNAs in strawberry fruits induced by Botrytis cinerea
Source: PubMed Central journal article supplement (PMC6053406; doi:10.1038/s41598-018-29289-7), 2018-07-19
Supplement: 41598_2018_29289_MOESM1_ESM.pdf [file 41598_2018_29289_MOESM1_ESM.pdf]

# Identification and characterization of known and novel microRNAs in strawberry fruits induced by *Botrytis cinerea*

Yaoxin Liang · Yuhan Guan · Shaoxi Wang · Yanjun Li · Zhihong Zhang · He Li \*

fan-novel-001(5p) 5'-AAGTTTGGCTTCGAATCTGGA-3'

5'-CAAGTAAGGT **AAGTTTGGCTTCGAATCTGGA** CTAAGTAACTAAGTAATATCAGATTCCAAGCCAAACTGACCTTACTTGA-3'

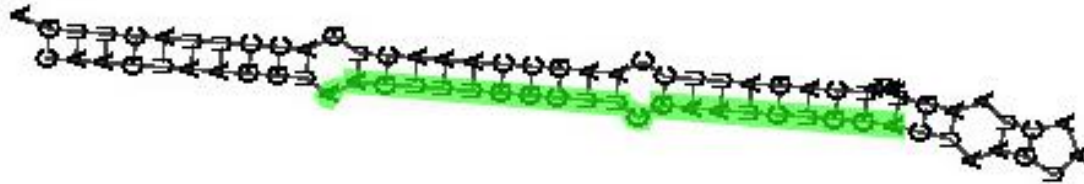

fan-novel-002(3p) 5'-AGGGCGAATACACTCTCAGA-3'

5'-

GGCGTGAAGGCTC **TGCGAGTGTCTTCACCTCTGA** AGCCTCTTTCTGAAGAAGCTCCTCTTCTTGTGGCTTC **AGGGCGAATACACTCTCAGA** CACTAC  
ACGC-3'

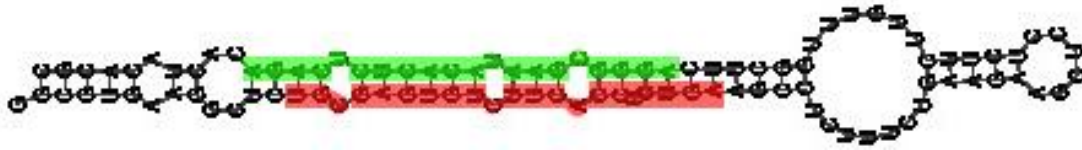

**fan-novel-003(5p) 5'-AGTGGTATCAGGGCTATGTT-3'**

5'-

GATTCAAACA **AGTGGTATCAGGGCTATGTT** AAAC TAGGATGCATCTTGATCTGGTTGCTTCAAGTCTGA **CCTAGCTCTGATACCATGTG** TTACTGACTTC

A-3'

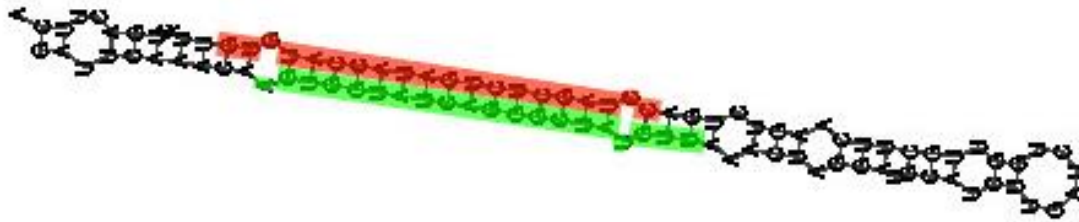

**fan-novel-004(3p) 5'-ATTGGATTGAAGGGAGCTCTC-3'**

5'-

ATAGAGAGATGA **GAGCTTCCTTCGGTCCAAATG** CAGGAGTAGAGATGGTGTACACTGCTCCTAATTCATGAATACCTCTGGGTTGCGCAGGATAATGAA

ACACTAATGCGCAGCTTAAGGGTTTGCATGACCTAGGAGCAGAGATTCCTTCTCATTTCCTTG **ATTGGATTGAAGGGAGCTCTC** ATTATTAGTG-3'

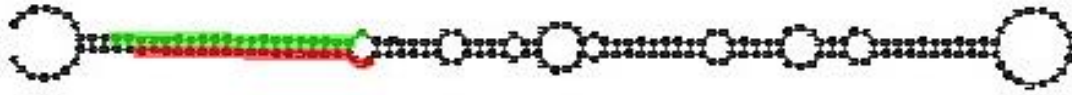

fan-novel-005(3p) 5'-CAGGGCGAATACACTCTCAGA-3'

5'-

GGCGTGAAGGCTC **TGCGAGTGTCTTCACCTCTGAA** GCCTCTTTCTGAAGAAGCTCCTCTTCTTGTTTGGCTT **CAGGGCGAATACACTCTCAGA** CACTAC  
ACGC-3'

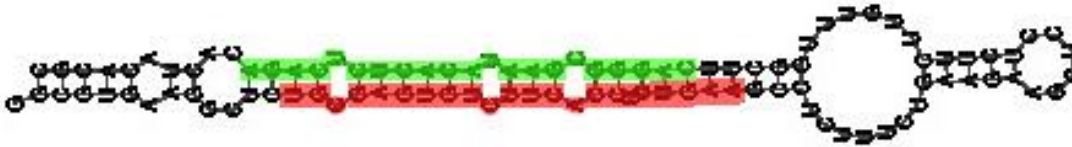

fan-novel-006(5p) 5'-CATGGGAAGTTTGGAAGAAT-3'

5'-AAGTTTCTGT **CATGGGAAGTTTGGAAGAAT** TGGTTGTTTGTATGACATCAAACCTTCTTCCAATTCCTCCCATGCCAGTGGTTT-3'

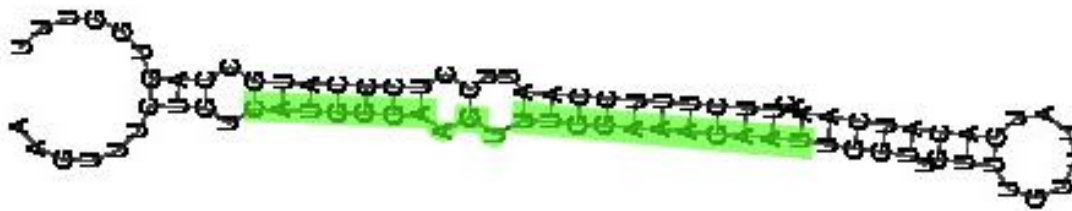

fan-novel-007(3p) 5'-CGGAAAACCTGGAATTTGGCGG-3'

5'-

CCCCGACGAGTCCGCCGAATTCCAGTTTTCCGGCCAGATCACCCAAAACCTTCAAACAAAGTCAATTTGGC **CGGAAAACCTGGAATTTGGCGG** ACTCGC  
CTGG-3'

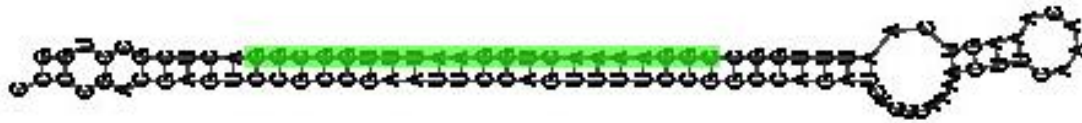

fan-novel-008(3p) 5'-CGGTATAGTCTTTCCTGAGCTCTTG -3'

5'-

AGTAGAGACAT **TGAGCCAGGAATGACTTGCCGGC** CGCGGGCACATGAGCCGTTGC **CGGTATAGTCTTTCCTGAGCTCTTG** TTTGCTCTCTT-3'

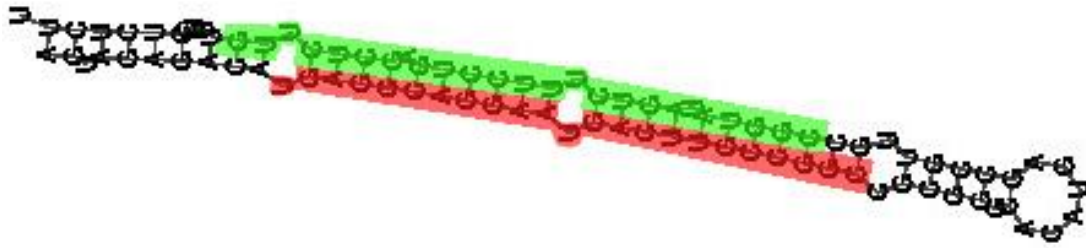

fan-novel-009(3p) 5'-GGAGCGACCTGAGACCACATG-3'

5'-

AAGGGTAGAGGAGTCCCTGAG **GGAGCGACCTGAGACCACATG** TGTGCACCCTCACCACACTCAAAGTGAGAGTACATAACCA **CGTGTTCTCAGGTCG**

CCCCTGCGAGACTTTCGGTTTACCAC-3'

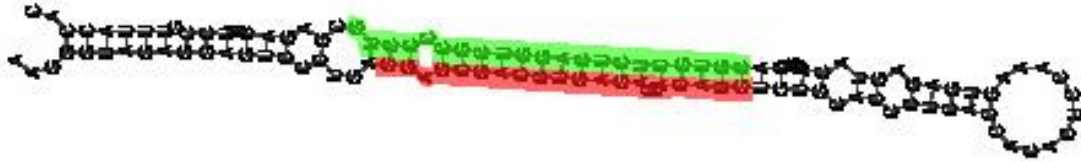

fan-novel-009\_1(5p) 5'-CGTGTTCTCAGGTCGCCCTG-3'

5'-

TTGCATTTCA**CGTGTTCTCAGGTCGCCCTG**CGGGACTTCTCTACCACGTAACCGCTCTTATGAAATGATAAGATGAGGAATGTAGAGGTGTGTATATG  
TTCACAGCATAAGCCAGCCACAAAGGGTAGAGGAGTCCCTGA**GGAGCGACCTGAGACCACATGTG**TGCAC-3'

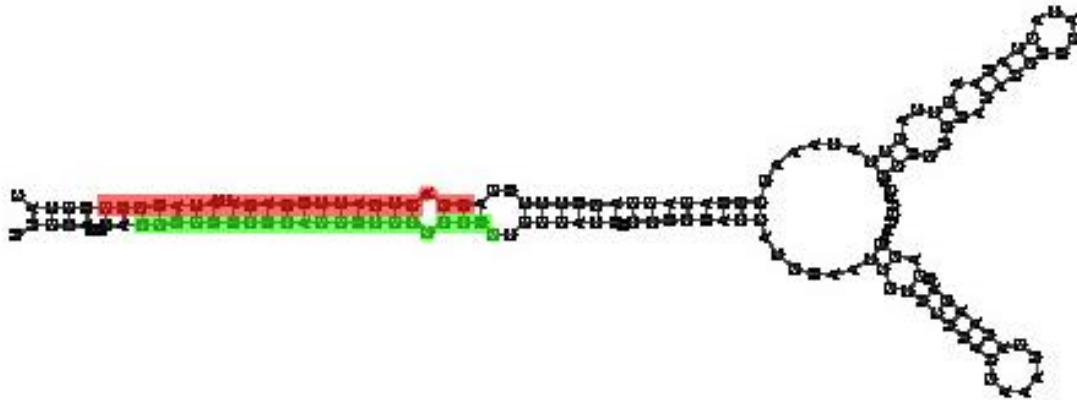

**fan-novel-010(3p) 5'-CTTTGATGACTGTGTGATGATG-3'**

5'-

CTAGAATTTGATCAAACCTCAGCATAAAGGTCTTGACTATCTTCATAATCTGCCCATCTTTATGGTTGATTAGGGGAACTTTGATGACTGTGTGATGATGATGATTCTGA-3'

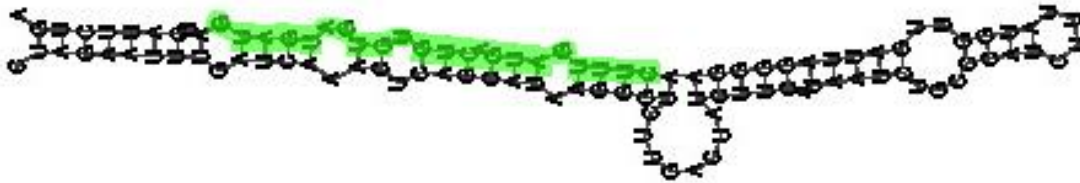

**fan-novel-010\_1(3p) 5'-CTTTGATGACTGTGTGATGATG-3'**

5'-

CTGGAATTTAATCAAACCTCAGCATAAAGGTCTTGATTATCTTCATAATCTGCCCATCTTTTTGGTTGATTAGGGGAACTTTGATGACTGTGTGATGATGATGATTCTGA-3'

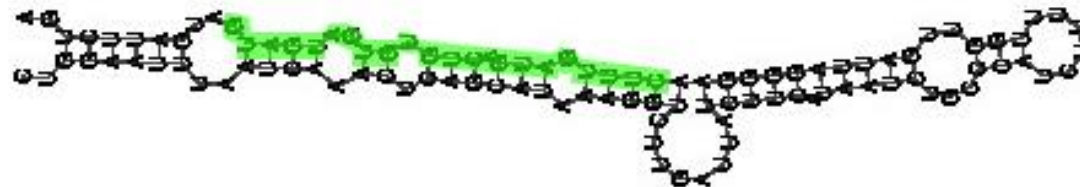

**fan-novel-011(3p) 5'-GGAGCGACCTGAGACCACATG-3'**

5'-

CCGGTGTTAATTTGCATTTACGTGTTCTCAGGTCGCCCCTGCGGGACTTCCTCTACCACGTAACCGCTCTTATGAAATGATAAGATGAGGAATGTAGAG  
GTGTGTATATGTTACAGCATAAGCCAGCCACAAAGGGTAGAGGAGTCCCTGAGGAGCGACCTGAGACCACATGTGTGCACCCT-3'

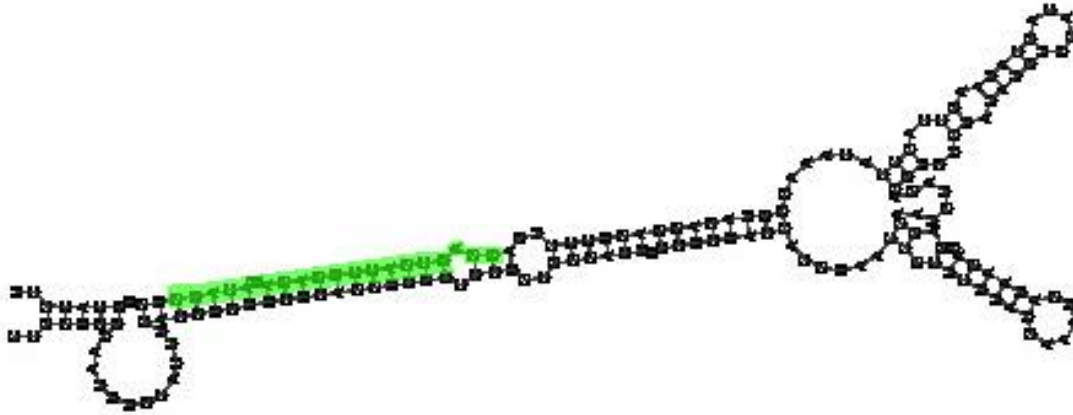

fan-novel-012(5p) 5'-GGAGTGACCTTGAGAACACAGG-3'

5'-

CCATTCAAAAAGAGTGACCTTGAGAACACAGGTTGGTGTTTAGCCACTTACATGTTAATATTAGCGCACCTTGTGTTCCCACGACACCCCTTTGGAACA  
C-3'

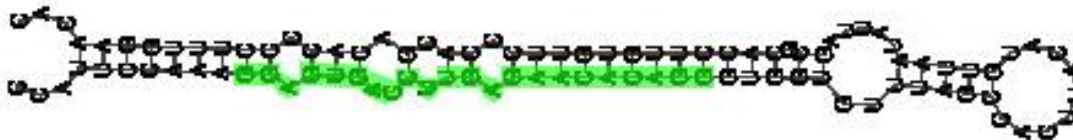

**fan-novel-013(5p) 5'-GTCGAGGATCTTGACGAGTTCATC-3'**

5'-

TGATTCTTTGCA **GTCGAGGATCTTGACGAGTTCATC** CAAGCACCATTGGAGGATGCATAGTTTTTCAGAGAGCACAAACGATTGATATCTTCGACTCTTCG  
ATTGCTTGGAGAAGCGCTGTAGAGATATCTTCTCCTCTTC **TGAGCTCGTCATCCATGAATG** TGTTGATTCC-3'

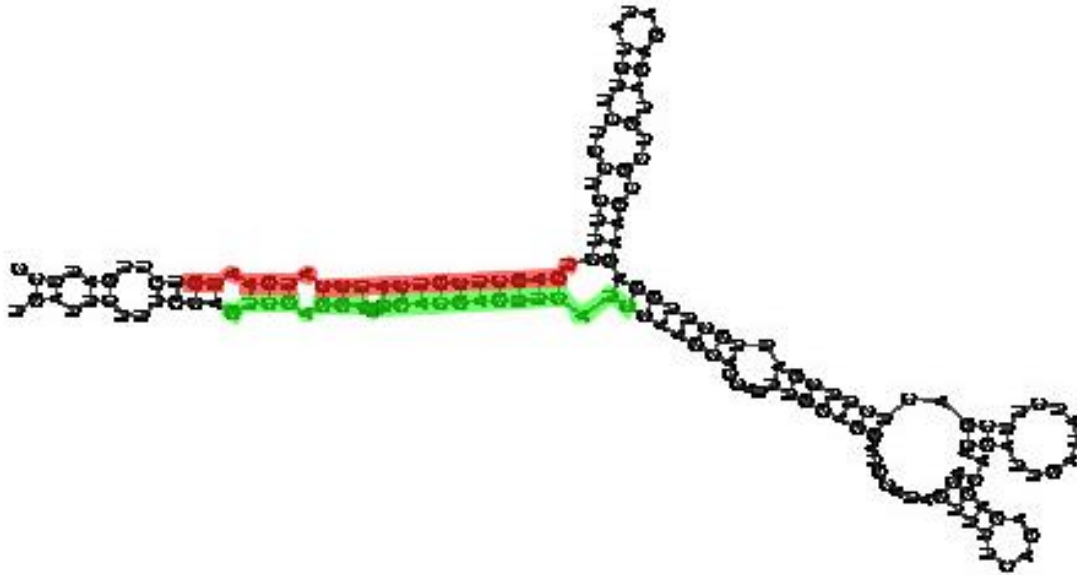

**fan-novel-014(3p) 5'-TCATCCAACACATCATCGGCAT-3' 5'-**

GATGTTTACTAAGAT **GCGGTGACGTGGTGGATGAAT** TTGCCTTCATAATCAAAGCAAAGGTGCAAACCTGTTTCCAGTTGACAGCAAAGTCACTTGA  
AACGTGGAAAACAATTCTTACCTTTCATTTGTAAGTTTTGCAATT **TCATCCAACACATCATCGGCAT** CGTAGGCAAT-3'



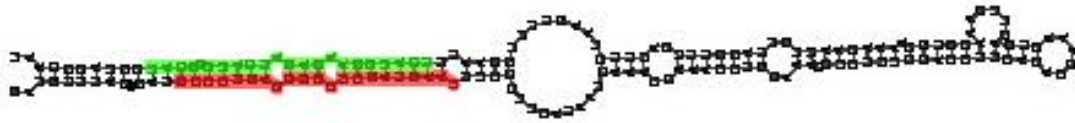

fan-novel-014\_1(3p) 5'-TCATCCAACACATCATCGGCAT-3'

5'-

TCAAGGATGTTTACTAAGAT **GCGGTGACGTGGTGGATGAAT**TTGCCTTCATAATCAAAGCAAAGGTGCAAACCTGTTTCCACGTTGACAGCAAAGTCA  
 CTTGAAACGTGGAAAACAATTCTTACCTTTCATTTGTAAGTTTGTCAATT **TCATCCAACACATCATCGGCAT**CGTAGGCAATATCTGCATAT-3'

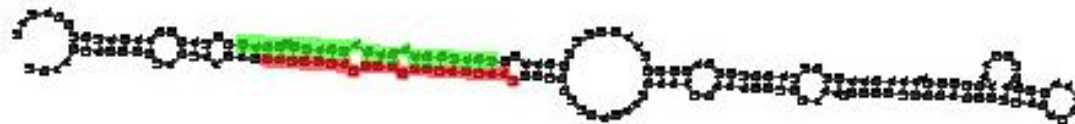

fan-novel-015(3p) 5'-TCCCTATTCCACCTATTCCCCA-3'

5'-

TAGATCCCAAGGAAGTTTTG **GGGTATAGGTGGTAGGATA**GAGATCAAAGACTTGTTCTTCCCTGAACAGTTTCTCT **TCCCTATTCCACCTATTCCCCA**  
 TGAGATCCTTTGGTTCCCTCC-3'

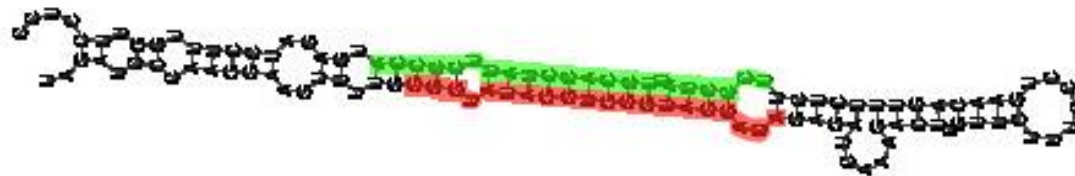

fan-novel-016(3p) 5'-TCCGTTGTAGTCTAGTTGGTC-3'

5'-

AGAGGAACAGGGCAGGCGTCGACTGCAATGGATATGAGAGACGCATAGAAAGAGGAAGACAAACGCTACAACACTGGAAAACCCTCTTTGCTGTGC  
CAAACCAAAAACGGTAGCAAGTAAGTGGACAAATATTGATAACTGTGTTAGTGGACATCGGATCCGTTGTAGTCTAGTTGGTCAGGATATTCG-3'

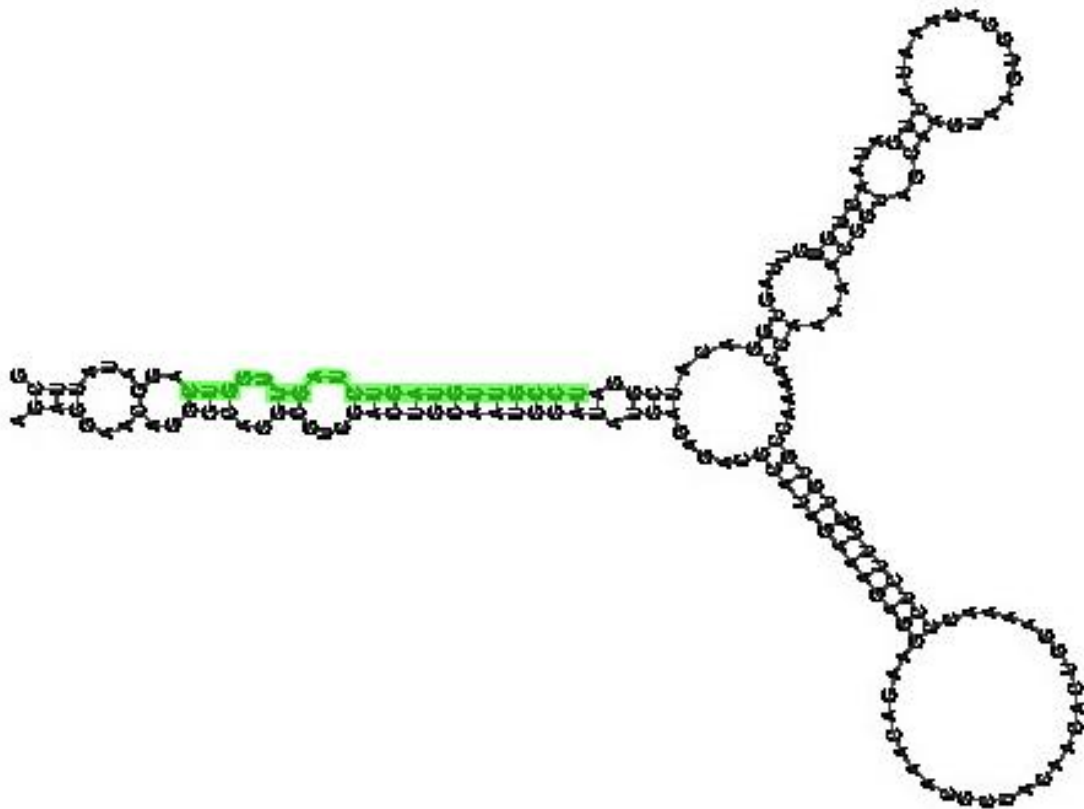

**fan-novel-016\_1(3p) 5'-TCCGTTGTAGTCTAGTTGGTC-3'**

5'-

GCATACTATATAACAGCTAAGACTATAATGATTTGGCTTCCACTAATTCAAGAAGATCATAATCTGAAGATGTAAAAGTAATTAGCTTCAAGCCTTCAAGT  
TTTTAGCAAATAAGAACCAATTTAAAGTTTTTAACTTAAGCCTGCTTCCCGTGAATAAAAAACAAAGTCAACCTTGAATCACAAC **TCCGTTGTAGTCTA**  
**GTTGGTC**AGGATATTCG-3'

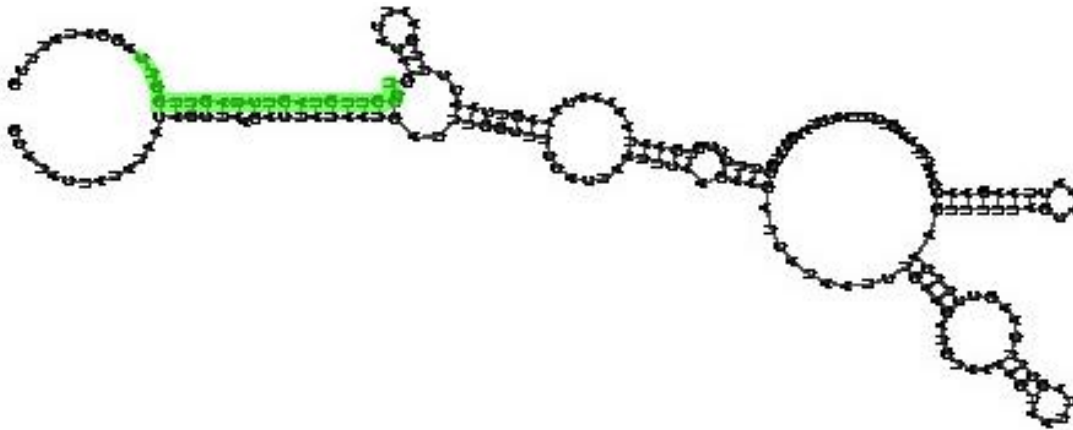

**fan-novel-017(5p) 5'-TCGAGGATCTTGACGAGTTCA-3'**

5'-

GCTGTTTTGATTCTTTGCAG **TCGAGGATCTTGACGAGTTCA** TCCAAGCACCATTTGGAGGATGCATAGTTTTTCAGAGAGCACAAACGATTGATATCTTCGA  
CTCTTCGATTGCTTGGAGAAGCGCTGTAGAGATATCTTCTCCTCTTC **TGAGCTCGTCATCCATGAATG** TGTTGATTCCCTTGTGACGC-3'

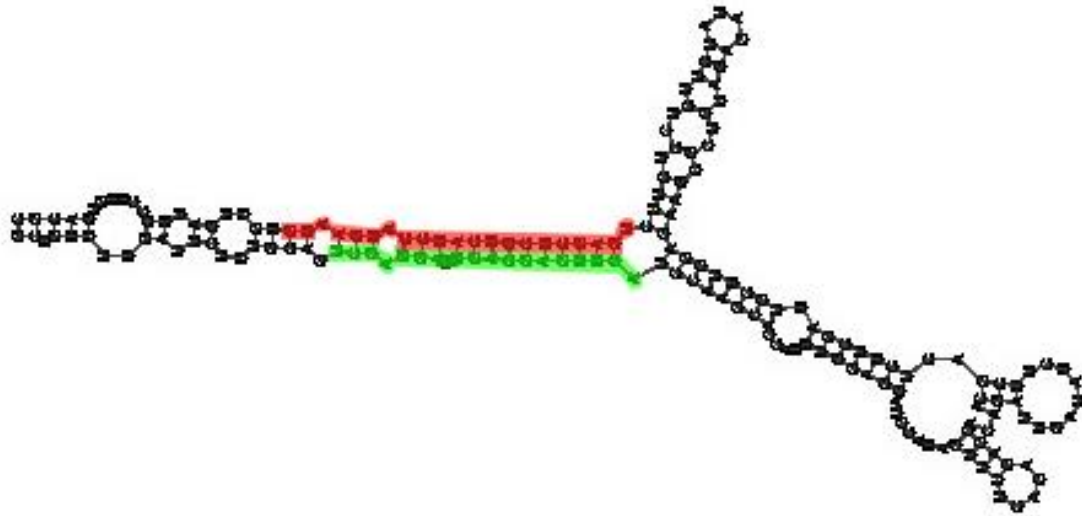

**fan-novel-018(5p) 5'-TCTATTCAAAGAGATGACTGTT-3'**

5'-

ATTCATTAGTCTATTCAAAGAGATGACTGTTGAAGAGGAAGAGTCTTAGAGAAAACCTCAGATTCTTCTCGACGTTCAGTCTCTCTTTGTATAGACT  
AGTGAATT-3'

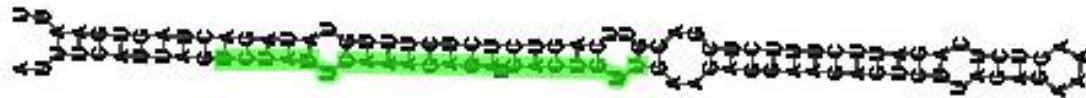

fan-novel-019(3p) 5'-TCTTGCCGATACCTCCCATTCC-3'

5'-

GACTTTGGAAATGTTGTTGGAGTGGGATGGTCGGCAAGAAATGAATAGAGAAAACCCACTCTTGATTCTTCCATTCTTGCCGATACCTCCCATTCC  
TGCAACCTTTTCACTACAAG-3'

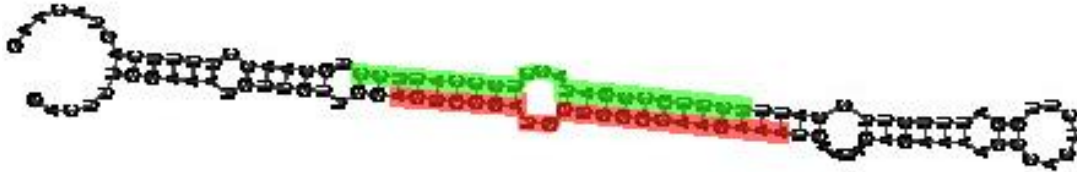

fan-novel-020(3p) 5'-TCTTCCTAGTCCTGCCATTCC-3'

5'-

GGAGTGGCCGGAAGTTGTGGAGTGGAGTTCTGGGAAAGAAGACCATGGTTTTTCTCGAAGTAATTTGGGAAAAAACATTGGTCTTCCTAGTCCTG  
CCATTCCTTGATTTCCTGTCATGCATC-3'

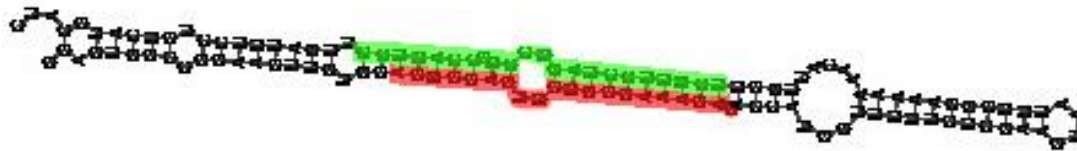

fan-novel-021(3p) 5'-TCTTCCTATTCTCCCATCCC-3'

5'-

TGTGAGGAAGTTGTAGTTGG **GATGGGAGGCTAGGGAAGAA**TTACTGGAAACTCATCCTAATT **TCTTCCTATTCTCCCATCCC**TCCTCAATTCCCAA  
GGTTT-3'

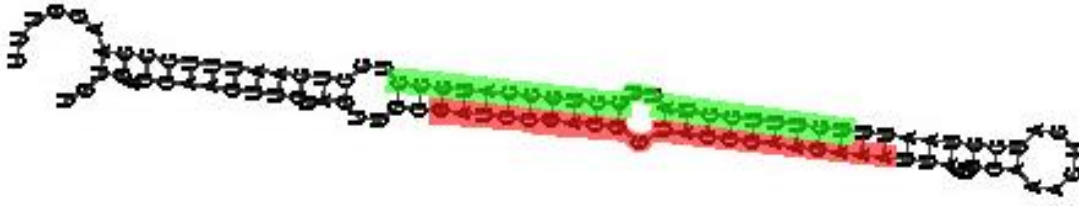

**fan-novel-022(3p) 5'-TGAAGTGGGATTTGGCGAATT-3'**

5'-

CTAGGGTCTTCTATCAGCGA **TTCGTCAGATTCCAATTCAAA**CTGAGTAGTCGGATGGTCGACTGTAAAGAGTT **TGAAGTGGGATTTGGCGAATT**GAGGG  
TCAAGATTAATAGAG-3'

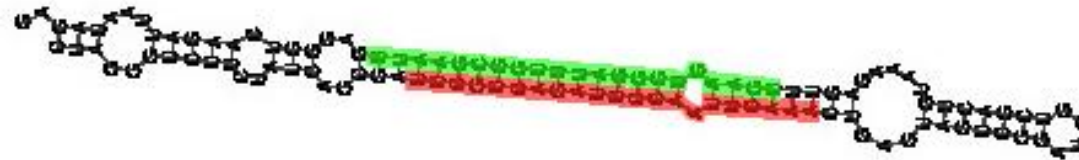

**fan-novel-022\_1(3p) 5'-TTCGTCAGATTCCAATTCAAA-3'**

5'-CTATCAGCGA **TTCGTCAGATTCCAATTCAAA**CTGAGTAGTCGGATGGTCGACTGTAAAGAGTT **TGAAGTGGGATTTGGCGAATT**GAGGGTCA-3'

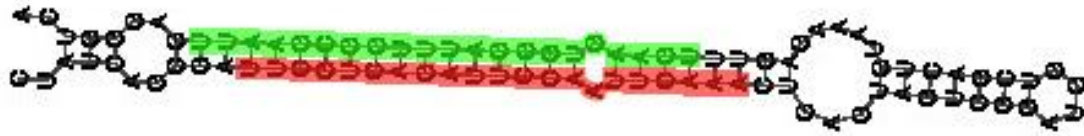

fan-novel-023(5p) 5'-TGAATTGGGATTTGGCGAATT-3'

5'-

GAAGAGAGTC **TGAATTGGGATTTGGCGAATT** GAGGGTCGCGATTAATAGATGTCCATCGTTTTGAGACACAGGAGAAGCGGGTTCCTTGTTTTGATGG  
GTAGTCCGGGAGGATGAAGAGAATGAGAGCTATCATAATTACTATAGATATATTCATGGAAAACGTTTACTCTATTGTGTTCTACGTATATATGTATGTATT  
GCTTCATTTGTTTTGTTTGTATTATACAGGTCGGAAATGGTTTGGTTTCAGCCTTTCAGAATGTGAGCAACCAGCTCTTGCTTTGCCAAAACTTTTTTTAT  
CCGTTGCGGCTGCGTTTCT-3'

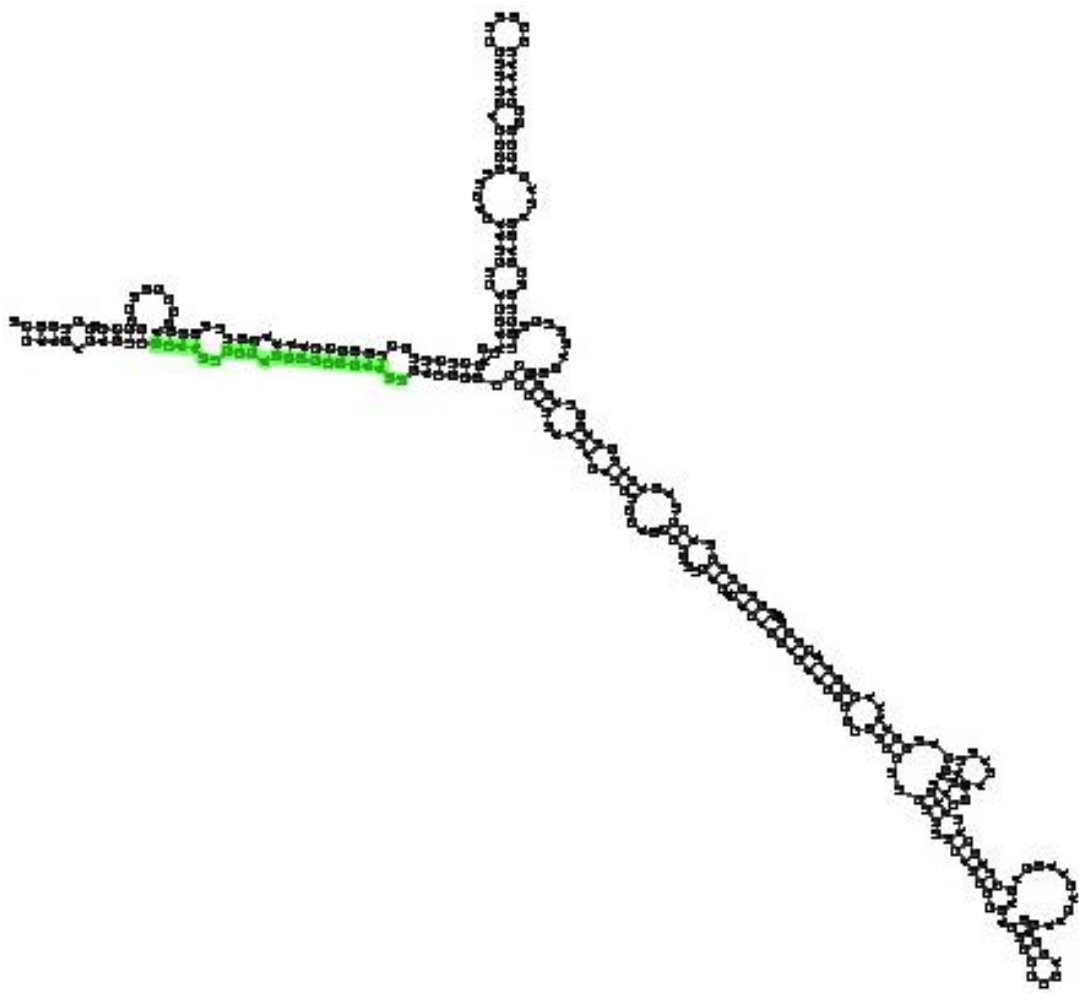



**fan-novel-023\_1(3p) 5'-TGAATTGGGATTTGGCGAATT-3'**

5'-

TTCGATCAGCAATTCGTCACATTCCAGTTCAAACCTGAGCAGCAGTCGGATATGGCCGACGTACTGAAGAGAGTCTGAATTGGGATTTGGCGAATTGAG  
GGTCGCG-3'

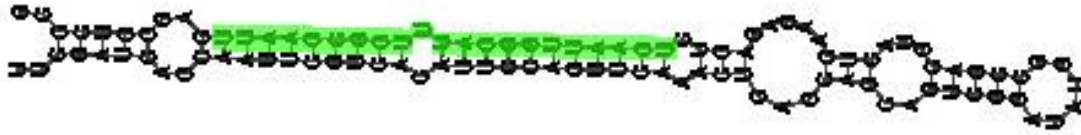

**fan-novel-024(5p) 5'-TGACAGAAGAGAGTGAGCTC-3'**

5'-

CTAAAGGGGC TGACAGAAGAGAGTGAGCTC AGATTACACATTTGTAATGAGTACTAAGTTTATCATCTTCCTCATGCTACATATTTGTGTAATGTGTGCT  
CACTTCTCTATCTGTCAGCTGCAGATC-3'

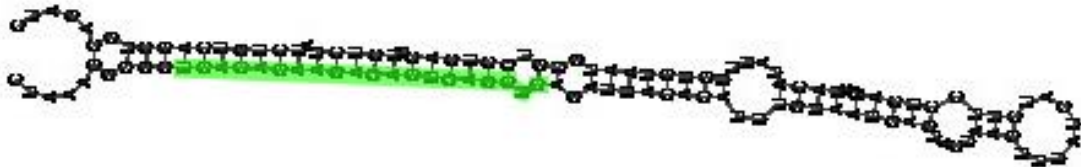

**fan-novel-025(3p) 5'-TGGAGCCTGCGAGGGGGAATG-3'**

5'-

AAGGCATTGGTTGATCACTCTCCCTCAAGGGCTTCTCGCCAAGGTGAAGTATTATATCCTAGGTCGTCCCCTTCTTAATTCTAAGGGAGACTTGGGGTAC

TTACACAAGGTTG **TGGAGCCTGCGAGGGGGAATG** ACCAAGCTTC-3'

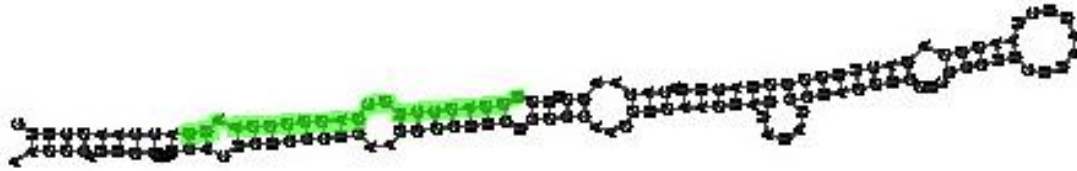

**fan-novel-026(3p)** 5'-TGGGATTGGGCGAATTTTGGT-3'

5'-

ATCGGTGACGTCTTCCGCAT **CAAAATTGGCCACCTCCCAAT** TAAAACCTAGAGTTTGAGATGCTCAAATCCTAGTTTGAAC **TGGGATTGGGCGAATTTT**  
**GGT**CGAGATTGATCTACTATGCT -3'

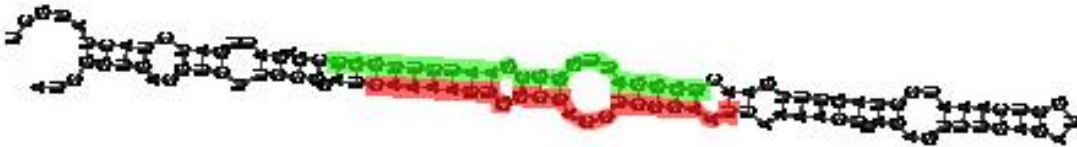

**fan-novel-027(3p)** 5'-TGGGATTTGGCGAATTGTGGT-3'

5'-

GGGTGAAGTCCTGCACCACAATTGGCCACCTCCCAATTGAAACTTAGGGTTTTAGATGCTCAAATCTTAGTTTGAAA **TGGGATTTGGCGAATTGTGGT**  
GAGATCACC-3'

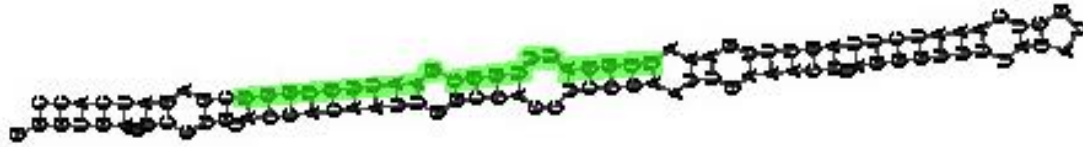

fan-novel-028(3p) 5'-TTACCCTTGCAATATCCGTTG-3'

5'-

AGTTGTAATTGCGTTGGTCA **ACGGATATTGCTAGGGTAGAG** AAGTCAACAAGGCTAAGTTAGCCTTAGGGCTTAGGAACATAT **TTACCCTTGCAATATCC**  
**GTTG**ATCAATATAATTACTTGTAC -3'

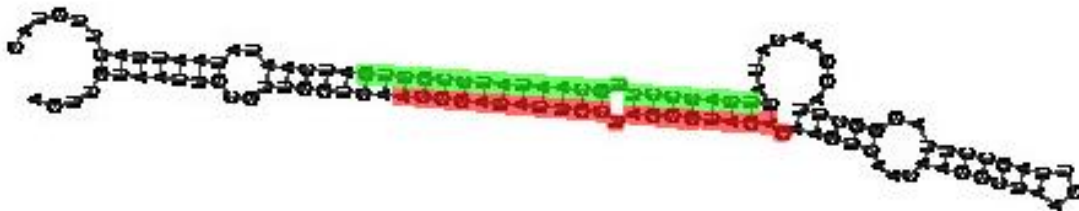

fan-novel-029(5p) 5'-TTCGTGATCTGCGAAAGGCTC-3'

5'-

CAAGAGAAAACCTCTCCTGTC **TTCGTGATCTGCGAAAGGCTC** CTCACAGTCATTGCCCATCTGATTGTGAGACTCAGGC **ACCTGTCGTAGATCATGAAG**  
**A**TGGGGTATCTTTCTCAAAGC-3'

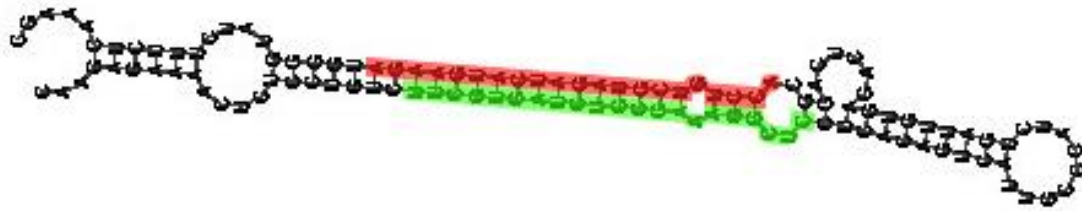

**fan-novel-030(3p) 5'-TTGCGGTCTTGTCTCTTCCAAT-3'**

5'-

CCCTAATTCGACTGGAAAAAGAAAGACCGCAAAGAAGCCCAGGACTTTCGCCGCCCTTTCTTCACAGAAAGGCTGGCTCTTGGCGCCCGGGAATC  
 CTT**TTGCGGTCTTGTCTCTTCCAAT**TCGAATTCGG-3'

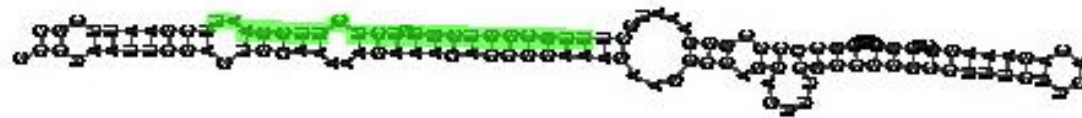

**fan-novel-031(3p) 5'-TTGGACTGAAGGGAGCTCCCC-3'**

5'-

TGTATCAAGGAAGGGAGCTTTCTTCAGTCCACTCATGGGTGGCAGTAGGATTTCAATTAGCTGCCGACTCATTATCCAATACTGGGTATTAGATCA  
 ATCAAGACAAACCCAGTAAATGCGTGAATGATGCGGGAGACAAATTGGATCTTAAGCTTCTGTAC**TTGGACTGAAGGGAGCTCCCC**TATCTAGTAC-3'

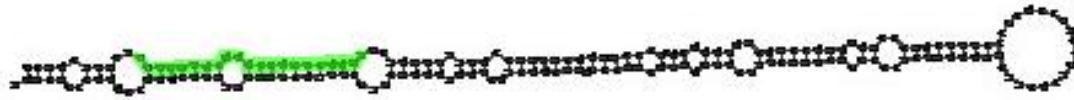

**fan-novel-032(3p) 5'-TTGGACTGAAGGGAGCTCCTC-3'**

5'-

TATATTAGCAAGAGAGCTTTCTTCAGTCCACTCATGGAAGGGCAAAGGGTTTGGATTAAGTCCAACTCATTCAACACAGTAGAGAAAACGGA  
 AGGAAACTCTGCCGCGAATGTGTGAATGATTTGGGAGGTAAATTCATCCTCTTCTTCTGTGC **TTGGACTGAAGGGAGCTCCTC** TCTTTAATGT-3'

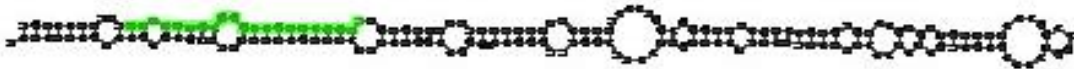

**fan-novel-033(3p) 5'-TTGGACTGAAGGGAGCTCCTC-3'**

5'-

GAGAGAGAAGGGAGGGAGAGCTTTCTTCAGTCCACTCATGGATAGGATTGGATGGGGTTTGTGAAGTAACTGCCTACTCATTCAAGCACTCCT  
 CAGTATCTTATGTTGCTACTGTGATTGATTGTGTGAATGAAGCGGGAGTTAATTTACATCCCTCTTTCTTTGCT **TTGGACTGAAGGGAGCTCCTC** CACT  
 TTTTCT-3'

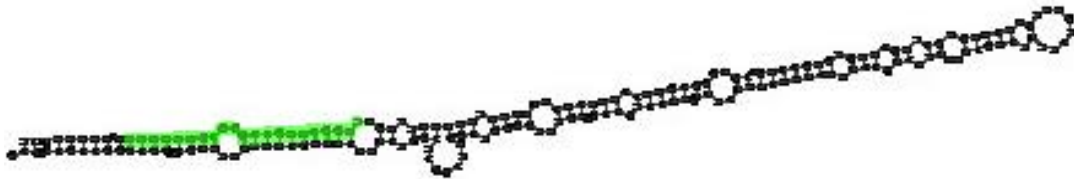

fan-novel-034(5p) 5'-TTGGAGAGAGAGTAGACAATG-3'

5'-

AGTTTCAGAAGCCAAGGTCC **TTGGAGAGAGAGTAGACAATG** TGGCGAAGTGCCGGTGCGAAGTCCACA **TTGTCTACTCTCTCGAAAGG** ACCTCG  
GCCTTCTGGATTCG-3'

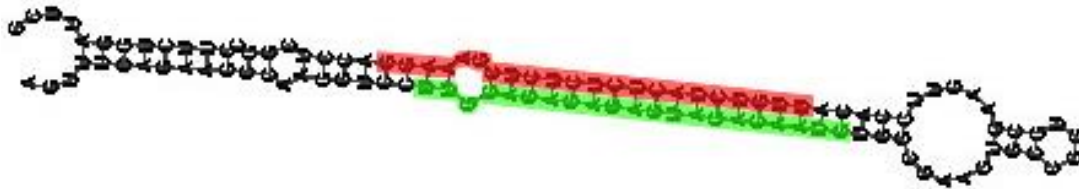

fan-novel-035(3p) 5'-TTGTCTACTCTCTCGAAAGG-3'

5'-AAGCCAAGGTCC **TTGGAGAGAGAGTAGACAATG** TGGCGAAGTGCCGGTGCGAAGTCCACA **TTGTCTACTCTCTCGAAAGG** ACCTCGGCCT-3'

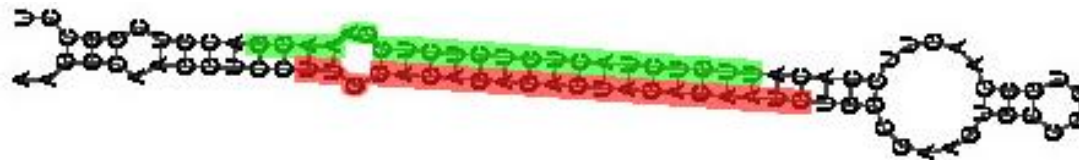

**Figure S1** Second structures of novel potential miRNAs in infected strawberry fruits 'Yanli' Precursor sequences for novel miRNA from strawberry were shown in black letters with miRNA and miRNA\* (The sequence complementary to miRNA in the fold-back structure) sequences highlighted in green and red, respectively.

Precursor secondary structures were produced using the mfold software (<http://mfold.bioinfo.rpi.edu/>).

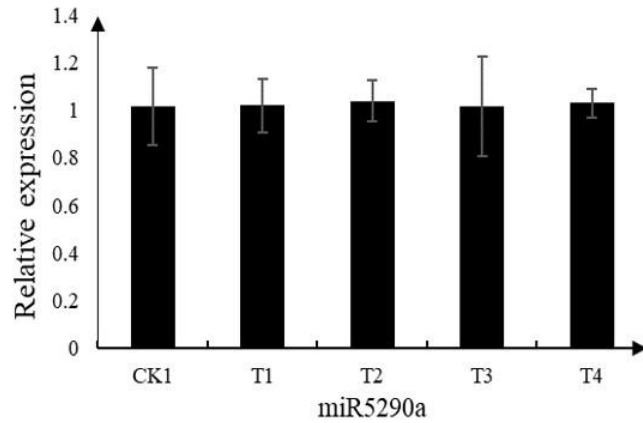

**Figure S2** qRT-PCR verification of miR5290a of ‘Yanli’ strawberry fruits treated with sterile water. CK1, T1, T2, T3, and T4 indicated that after the treatment with sterile water, red ripening fruits were chose and took at 0 h, 48 h, 72 h, 96 h and 120 h, respectively.

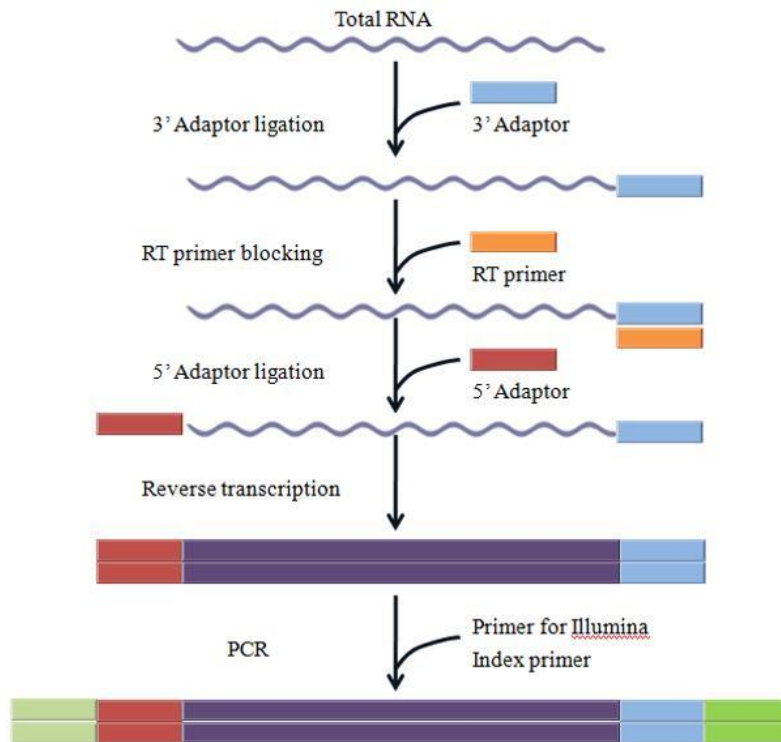

**Figure S3** Library construction flow chart.

|     |     |     |     |     |     |     |    |       |                     |
|-----|-----|-----|-----|-----|-----|-----|----|-------|---------------------|
| CTC | ATC | GAC | TCC | TCT | CTC | TCC | AA | ----- | Original sequence   |
|     |     |     |     |     |     |     |    |       |                     |
| CTG | ATT | GAT | TCG | TCG | CTG | TCG | AA | ----- | Mutation sequence   |
|     |     |     |     |     |     |     |    |       |                     |
| L   | I   | D   | S   | S   | L   | S   |    | ----- | Amino acid sequence |

**Figure S4** Base sequence and amino acid sequence before and after mutation of miR5290a and *PIRL* gene binding sites.

Table S1: Conserved strawberry miRNA in six libraries

| miRNA family | Name    | Sequence (5'-3')          | Length( nt) | Actual MiR read |            |            |            |           |    | Normalized MiR read |              |         |              |             |    | Ratio | Conserved in other plants |    |    |    |    |    |    |    | The fan-miRNA location in <i>F.vesca</i> genome                                                                                                                                                                                            |
|--------------|---------|---------------------------|-------------|-----------------|------------|------------|------------|-----------|----|---------------------|--------------|---------|--------------|-------------|----|-------|---------------------------|----|----|----|----|----|----|----|--------------------------------------------------------------------------------------------------------------------------------------------------------------------------------------------------------------------------------------------|
|              |         |                           |             | T0              | T1         | T2         | T3         | T4        | CK | T0                  | T1           | T2      | T3           | T4          | CK |       | T4/T0                     | at | os | pt | vv | ct | cs | md |                                                                                                                                                                                                                                            |
| miR156       | miR156a | UUGACAGAAGAGAGUGAGC<br>AC | 21          | 8271<br>4       | 21846<br>6 | 11280<br>6 | 1202<br>53 | 4196<br>3 | 0  | 5474.0<br>2         | 16898.7<br>9 | 9054.1  | 10004.<br>59 | 2163.<br>67 | 0  | 0.4   | +                         | +  | +  | +  | +  | +  | +  | ++ | LG2:21698036:21698<br>291:- 256(nt) -<br>51.80(kcal/mol)<br>LG3:29883620:29883<br>738:+ 119(nt) -<br>58.33(kcal/mol)<br>LG3:29884152:29884<br>255:+ 104(nt) -<br>53.50(kcal/mol)<br>LG3:5985875:598615<br>8:- 284(nt) -<br>75.20(kcal/mol) |
|              | miR156b | UUGACAGAAGAGAGUGAGC<br>AU | 21          | 1629            | 4760       | 2865       | 3340       | 919       | 0  | 107.81              | 368.2        | 229.95  | 277.88       | 47.38       | 0  | 0.44  | +                         | +  | +  | +  | +  | +  | +  | +  | no location in <i>F.vesca</i> genome                                                                                                                                                                                                       |
|              | miR156c | UUGCCAGAAGAGAGUGAGC<br>AC | 21          | 46              | 2023       | 984        | 75         | 6         | 0  | 3.04                | 156.48       | 78.98   | 6.24         | 0.31        | 0  | 0.1   | +                         | +  | +  | +  | +  | +  | +  | +  | no location in <i>F.vesca</i> genome                                                                                                                                                                                                       |
|              | miR156d | UUGACAGAAGAGAGUGAGC<br>AA | 21          | 557             | 1637       | 730        | 745        | 92        | 0  | 36.86               | 126.63       | 58.59   | 61.98        | 4.74        | 0  | 0.13  | +                         | +  | +  | +  | +  | +  | +  | +  | no location in <i>F.vesca</i> genome                                                                                                                                                                                                       |
|              | miR156e | UGACAGAAGAGAGUGAGCU<br>C  | 20          | 662             | 1646       | 776        | 324        | 61        | 0  | 43.81               | 127.32       | 62.28   | 26.96        | 3.15        | 0  | 0.07  | +                         | +  | +  | +  | +  | +  | +  | +  | LG1:192269:192395:<br>+ 127(nt) -<br>56.50(kcal/mol)                                                                                                                                                                                       |
|              | miR156f | UUGGCAGAAGAGAGUGAGC<br>AC | 21          | 397             | 1311       | 609        | 598        | 192       | 0  | 26.27               | 101.41       | 48.88   | 49.75        | 9.9         | 0  | 0.38  | +                         | +  | +  | +  | +  | +  | +  | +  | no location in <i>F.vesca</i> genome                                                                                                                                                                                                       |
|              | miR156g | UUGACAGAAGAGAGUGAGC<br>GC | 21          | 437             | 1439       | 720        | 534        | 143       | 0  | 28.92               | 111.31       | 57.79   | 44.43        | 7.37        | 0  | 0.25  | +                         | +  | +  | +  | +  | +  | +  | +  | no location in <i>F.vesca</i> genome                                                                                                                                                                                                       |
| miR157       | miR157  | UUGACAGAAGAUAGUGAGC<br>AC | 21          | 6513            | 14823      | 13533      | 1112<br>3  | 4243      | 0  | 431.03              | 1146.59      | 1086.19 | 925.39       | 218.7<br>7  | 0  | 0.51  | +                         | -  | -  | -  | -  | -  | -  | -  | no location in <i>F.vesca</i> genome                                                                                                                                                                                                       |



|         |                          |                           |    |            |            |            |           |           |      |        |              |              |             |             |      |      |   |   |   |   |   |   |                                         |                                                          |
|---------|--------------------------|---------------------------|----|------------|------------|------------|-----------|-----------|------|--------|--------------|--------------|-------------|-------------|------|------|---|---|---|---|---|---|-----------------------------------------|----------------------------------------------------------|
| miR159  | miR159a                  | UUUGGAUUGAAGGGAGCUC<br>UA | 21 | 1630<br>25 | 45779<br>5 | 59346<br>6 | 6273<br>1 | 2836<br>0 | 13   | 10789  | 35411.3<br>8 | 47633.1<br>2 | 5218.9<br>8 | 1462.<br>28 | 0.69 | 0.14 | + | + | + | + | - | + | +                                       | LG5:10261604:10261<br>801:- 198(nt) -<br>89.80(kcal/mol) |
|         | miR159b                  | UUUGGAUUGAAGGGAGCUC<br>UC | 21 | 2795       | 10892      | 16269      | 1713      | 791       | 0    | 184.97 | 842.52       | 1305.79      | 142.52      | 40.79       | 0    | 0.22 | + | + | + | + | - | + | +                                       | no location in <i>F.vesca</i><br>genome                  |
|         | miR159c                  | UUUGGAUUGAAGGGAGCUC<br>UG | 21 | 1286       | 6662       | 9022       | 251       | 32        | 0    | 85.11  | 515.32       | 724.13       | 20.88       | 1.65        | 0    | 0.02 | + | + | + | + | - | + | +                                       | no location in <i>F.vesca</i><br>genome                  |
|         | miR159d                  | UUUGGAUUGAAGGGAGCUC<br>CA | 21 | 1926       | 6328       | 9839       | 817       | 405       | 0    | 127.46 | 489.48       | 789.7        | 67.97       | 20.88       | 0    | 0.16 | + | + | + | + | - | + | +                                       | no location in <i>F.vesca</i><br>genome                  |
|         | miR159e                  | UUUGGAUUGAAGGGAGCUC<br>UU | 21 | 3010       | 7218       | 9182       | 943       | 622       | 0    | 199.2  | 558.33       | 736.97       | 78.45       | 32.07       | 0    | 0.16 | + | + | + | + | - | + | +                                       | no location in <i>F.vesca</i><br>genome                  |
|         | miR159f                  | CUUGGAUUGAAGGGAGCUC<br>UA | 21 | 622        | 2442       | 2921       | 199       | 74        | 0    | 41.16  | 188.89       | 234.45       | 16.56       | 3.82        | 0    | 0.09 | + | + | + | + | - | + | +                                       | no location in <i>F.vesca</i><br>genome                  |
|         | miR159g                  | UUUGGAUUGAGGGAGCUC<br>UA  | 21 | 690        | 2160       | 2578       | 222       | 61        | 0    | 45.66  | 167.08       | 206.92       | 18.47       | 3.15        | 0    | 0.07 | + | + | + | + | - | + | -                                       | no location in <i>F.vesca</i><br>genome                  |
|         | miR159h                  | UUUGGAUUGAAGGGGCUC<br>UA  | 21 | 807        | 2143       | 2564       | 291       | 98        | 0    | 53.41  | 165.77       | 205.79       | 24.21       | 5.05        | 0    | 0.09 | + | + | + | + | - | + | -                                       | no location in <i>F.vesca</i><br>genome                  |
|         | miR159i                  | UUUGGAUUGAGGGAGCUC<br>UA  | 21 | 545        | 1891       | 2456       | 208       | 71        | 0    | 36.07  | 146.27       | 197.12       | 17.3        | 3.66        | 0    | 0.1  | + | + | + | + | - | + | -                                       | no location in <i>F.vesca</i><br>genome                  |
|         | miR159j                  | UUUCGAUUGAAGGGAGCUC<br>UA | 21 | 12         | 1906       | 2316       | 14        | 0         | 0    | 0.79   | 147.43       | 185.89       | 1.16        | 0           | 0    | 0    | + | + | + | + | - | + | -                                       | no location in <i>F.vesca</i><br>genome                  |
|         | miR159k                  | UUUGGAUUGAAGGGAGCCC<br>UA | 21 | 891        | 2800       | 3923       | 248       | 72        | 0    | 58.97  | 216.59       | 314.87       | 20.63       | 3.71        | 0    | 0.06 | + | + | + | + | - | + | -                                       | no location in <i>F.vesca</i><br>genome                  |
|         | miR159l                  | UUUGGUUGAAGGGAGCUC<br>UA  | 21 | 725        | 1732       | 2236       | 204       | 67        | 0    | 47.98  | 133.97       | 179.47       | 16.97       | 3.45        | 0    | 0.07 | + | + | + | + | - | + | -                                       | no location in <i>F.vesca</i><br>genome                  |
|         | miR159m                  | AUUGGAUUGAAGGGAGCUC<br>UA | 21 | 352        | 2058       | 2253       | 355       | 65        | 0    | 23.3   | 159.19       | 180.83       | 29.53       | 3.35        | 0    | 0.14 | + | + | + | + | - | + | +                                       | no location in <i>F.vesca</i><br>genome                  |
|         | miR159n                  | UUCGGAUUGAAGGGAGCUC<br>UA | 21 | 398        | 1241       | 1544       | 140       | 49        | 0    | 26.34  | 95.99        | 123.93       | 11.65       | 2.53        | 0    | 0.1  | + | + | + | + | - | + | -                                       | no location in <i>F.vesca</i><br>genome                  |
| miR159o | UUUAGAUGAAGGGAGCUC<br>UA | 21                        | 91 | 1121       | 1338       | 31         | 6         | 0         | 6.02 | 86.71  | 107.39       | 2.58         | 0.31        | 0           | 0.05 | +    | + | + | + | - | + | - | no location in <i>F.vesca</i><br>genome |                                                          |

|        |         |                           |    |           |       |       |           |      |    |        |         |         |             |            |      |      |   |   |   |   |   |   |    |                                                                                                                                                                                                                                                                                                    |
|--------|---------|---------------------------|----|-----------|-------|-------|-----------|------|----|--------|---------|---------|-------------|------------|------|------|---|---|---|---|---|---|----|----------------------------------------------------------------------------------------------------------------------------------------------------------------------------------------------------------------------------------------------------------------------------------------------------|
|        | miR159p | UCUGGAUUGAAGGGAGCUC<br>UA | 21 | 342       | 970   | 1304  | 109       | 37   | 0  | 22.63  | 75.03   | 104.66  | 9.07        | 1.91       | 0    | 0.08 | + | + | + | + | - | + | -  | no location in <i>F.vesca</i><br>genome                                                                                                                                                                                                                                                            |
|        | miR159q | UUUGGAUUGAAGGGAGCUC<br>G  | 20 | 311       | 1203  | 1452  | 219       | 64   | 0  | 20.58  | 93.05   | 116.54  | 18.22       | 3.3        | 0    | 0.16 | + | + | + | + | - | + | +  | no location in <i>F.vesca</i><br>genome                                                                                                                                                                                                                                                            |
| miR162 | miR162  | UCGAUAAACCUCUGCAUCC<br>AG | 21 | 2839      | 2536  | 2524  | 91        | 59   | 0  | 187.89 | 196.16  | 202.58  | 7.57        | 3.04       | 0    | 0.02 | + | + | + | + | - | + | ++ | LG5:8224750:822487<br>0:- 121(nt) -<br>44.20(kcal/mol)                                                                                                                                                                                                                                             |
| miR164 | miR164  | UGGAGAAGCAGGGCAGCUG<br>CA | 21 | 2752      | 15480 | 17513 | 1173      | 624  | 0  | 182.13 | 1197.41 | 1405.64 | 97.59       | 32.17      | 0    | 0.18 | + | + | + | + | + | + | ++ | LG2:16008062:16008<br>160:- 99(nt) -<br>51.70(kcal/mol)<br>LG6:7425147:742531<br>4:- 168(nt) -<br>59.90(kcal/mol)                                                                                                                                                                                  |
| miR166 | miR166a | UCGGACCAGGCUUCAUCC<br>CC  | 21 | 2158<br>2 | 52767 | 61916 | 1887<br>5 | 5854 | 11 | 1428.3 | 4081.64 | 4969.54 | 1570.3<br>3 | 301.8<br>4 | 0.59 | 0.21 | + | + | + | + | + | + | ++ | LG2:12452993:12453<br>096:- 104(nt) -<br>61.90(kcal/mol)<br>LG4:2653251:265336<br>8:- 118(nt) -<br>48.70(kcal/mol)<br>LG5:5707593:570776<br>0:- 168(nt) -<br>67.20(kcal/mol)<br>LG7:1205656:120583<br>0:- 175(nt) -<br>59.00(kcal/mol)<br>LG7:20072843:20072<br>980:- 138(nt) -<br>51.26(kcal/mol) |
|        | miR166b | UCGGACCAGGCUUCAUCC<br>CU  | 21 | 1750      | 4191  | 4916  | 1585      | 222  | 0  | 115.82 | 324.18  | 394.57  | 131.87      | 11.45      | 0    | 0.1  | + | + | + | + | + | + | +  | no location in <i>F.vesca</i><br>genome                                                                                                                                                                                                                                                            |

|        |         |                           |    |           |       |       |      |      |   |             |         |         |        |            |   |      |   |   |   |   |   |   |                                          |                                                                                                                                                                           |
|--------|---------|---------------------------|----|-----------|-------|-------|------|------|---|-------------|---------|---------|--------|------------|---|------|---|---|---|---|---|---|------------------------------------------|---------------------------------------------------------------------------------------------------------------------------------------------------------------------------|
|        | miR166c | UCGGACCAGGCUUCAUCC<br>CA  | 21 | 355       | 1062  | 1339  | 417  | 39   | 0 | 23.49       | 82.15   | 107.47  | 34.69  | 2.01       | 0 | 0.09 | + | + | + | + | + | + | +                                        | no location in <i>F. vesca</i><br>genome                                                                                                                                  |
| miR167 | miR167  | UGAAGCUGCCAGCAUGAUC<br>UG | 21 | 1705<br>6 | 32206 | 37945 | 2387 | 502  | 0 | 1128.7<br>7 | 2491.2  | 3045.56 | 198.59 | 25.88      | 0 | 0.02 | + | + | + | + | + | + | +                                        | LG3:7735778:773604<br>5:- 268(nt) -<br>80.97(kcal/mol)                                                                                                                    |
| miR319 | miR319a | UUGGACUGAAGGGAGCUCC<br>UC | 21 | 8631      | 18382 | 12719 | 3878 | 847  | 0 | 571.2       | 1421.89 | 1020.86 | 322.63 | 43.67      | 0 | 0.08 | + | + | + | + | + | + | +                                        | LG7:18365232:18365<br>436:+ 205(nt) -<br>81.51(kcal/mol)                                                                                                                  |
|        | miR319b | UUGGACUGAAGGGAGCUCC<br>CC | 21 | 6145      | 21260 | 14263 | 5050 | 2283 | 0 | 406.68      | 1644.5  | 1144.79 | 420.14 | 117.7<br>1 | 0 | 0.29 | + | + | + | + | + | + | +                                        | LG5:2300704:230090<br>0:- 197(nt) -<br>86.87(kcal/mol)                                                                                                                    |
| miR395 | miR395  | CUGAAGUGUUUGGGGAAC<br>UC  | 21 | 2345      | 871   | 1637  | 189  | 180  | 0 | 155.19      | 67.37   | 131.39  | 15.72  | 9.28       | 0 | 0.06 | + | + | + | + | - | + | ++                                       | no location in <i>F. vesca</i><br>genome                                                                                                                                  |
| miR396 | miR396a | UUCCACAGCUUUCUUGAAC<br>UU | 21 | 1777<br>8 | 21375 | 22110 | 2350 | 2302 | 0 | 1176.5<br>5 | 1653.4  | 1774.61 | 195.51 | 118.6<br>9 | 0 | 0.1  | + | + | + | + | - | + | ++                                       | LG1:2526788:252690<br>4:- 117(nt) -<br>50.40(kcal/mol)                                                                                                                    |
|        | miR396b | UUCCACAGCUUUCUUGAAC<br>UG | 21 | 8522      | 13142 | 13457 | 2595 | 863  | 0 | 563.99      | 1016.56 | 1080.09 | 215.89 | 44.5       | 0 | 0.08 | + | + | + | + | - | + | ++                                       | LG0:9235898:923601<br>9:+ 122(nt) -<br>44.20(kcal/mol)<br>LG1:2522058:252218<br>0:+ 123(nt) -<br>59.70(kcal/mol)<br>LG3:1706980:170707<br>2:- 93(nt) -<br>45.30(kcal/mol) |
|        | miR396c | UUCCACAGCUUUCUUGAAC<br>UC | 21 | 927       | 1278  | 1656  | 183  | 118  | 0 | 61.35       | 98.86   | 132.91  | 15.22  | 6.08       | 0 | 0.1  | + | + | + | + | - | + | +                                        | no location in <i>F. vesca</i><br>genome                                                                                                                                  |
| miR398 | miR398  | GGUGCGACCUGAGAUCACA<br>UG | 21 | 1958<br>5 | 50715 | 13120 | 0    | 1536 | 0 | 1296.1<br>4 | 3922.91 | 1053.05 | 0      | 79.2       | 0 | 0.06 | - | - | + | - | - | - | no location in <i>F. vesca</i><br>genome |                                                                                                                                                                           |
| miR399 | miR399  | UGCCAAAGGAGAGUUGCCC<br>UG | 21 | 644       | 916   | 1506  | 43   | 44   | 0 | 42.62       | 70.85   | 120.88  | 3.58   | 2.27       | 0 | 0.05 | + | + | + | + | - | + | ++                                       | LG5:958268:958392:<br>- 125(nt) -<br>55.00(kcal/mol)                                                                                                                      |

|         |          |                            |    |            |             |             |            |            |    |              |               |               |              |            |      |           |   |   |   |   |   |   |   |                                                          |
|---------|----------|----------------------------|----|------------|-------------|-------------|------------|------------|----|--------------|---------------|---------------|--------------|------------|------|-----------|---|---|---|---|---|---|---|----------------------------------------------------------|
| miR408  | miR408   | ACAGGGACGAGGUAGAGCA<br>UG  | 21 | 4483       | 9278        | 9460        | 1257       | 1222       | 0  | 296.69       | 717.67        | 759.28        | 104.58       | 63.01      | 0    | 0.21      | - | + | - | - | - | - | + | LG1:12223080:12223<br>380:- 301(nt) -<br>82.30(kcal/mol) |
| miR477  | miR477   | CUCUCCCUC AAGGGCUUCU<br>C  | 20 | 813        | 1681        | 1170        | 253        | 279        | 0  | 53.8         | 130.03        | 93.91         | 21.05        | 14.39      | 0    | 0.27      | - | - | - | - | - | - | + | LG5:2676778:267691<br>2:+ 135(nt) -<br>60.50(kcal/mol)   |
| miR482  | miR482   | UCUUUCCAAUCCUCCCAU<br>GCC  | 22 | 2098       | 5187        | 7002        | 279        | 61         | 0  | 138.85       | 401.23        | 562           | 23.21        | 3.15       | 0    | 0.02      | - | - | - | - | - | - | - | LG4:464029:464131:<br>- 103(nt) -<br>37.90(kcal/mol)     |
| miR868  | miR868   | UAUGUCAUAACAGUAGACU<br>ACA | 22 | 0          | 0           | 0           | 0          | 6167       | 0  | 0            | 0             | 0             | 0            | 317.9<br>8 | 0    | >> 1      | - | - | - | - | - | - | - | no location in <i>F.vesca</i><br>genome                  |
| miR948  | miR948   | UCAGGUUGAUCGUGGAUCC<br>UG  | 21 | 0          | 0           | 0           | 0          | 4834       | 0  | 0            | 0             | 0             | 0            | 249.2<br>5 | 0    | >> 1      | - | - | - | - | - | - | - | no location in <i>F.vesca</i><br>genome                  |
| miR1026 | miR1026  | UUGUGAAAUGACUUGAGAG<br>GUG | 22 | 0          | 547         | 1261        | 0          | 0          | 0  | 0            | 42.31         | 101.21        | 0            | 0          | 0    | Both<br>0 | - | - | - | - | - | - | - | no location in <i>F.vesca</i><br>genome                  |
| miR1122 | miR1122  | UAAGAGACAUCGGUUUUGG<br>ACU | 22 | 0          | 0           | 0           | 4602       | 0          | 0  | 0            | 0             | 0             | 382.87       | 0          | 0    | Both<br>0 | - | - | - | - | - | - | - | no location in <i>F.vesca</i><br>genome                  |
| miR1511 | miR1511a | AACCGGCUCUGAUACCAAU<br>UG  | 21 | 9173<br>67 | 16412<br>17 | 16282<br>76 | 3535<br>14 | 1306<br>89 | 71 | 60711.<br>38 | 126951.<br>48 | 130689.<br>66 | 29411.<br>01 | 6738.<br>5 | 3.79 | 0.11      | - | - | - | - | - | - | - | LG5:1342711:134283<br>7:- 127(nt) -<br>58.50(kcal/mol)   |
|         | miR1511b | AACCGGCUCUGAUACCAAU<br>UA  | 21 | 1150<br>4  | 19481       | 20532       | 4557       | 642        | 0  | 761.34       | 1506.9        | 1647.95       | 379.12       | 33.1       | 0    | 0.04      | - | - | - | - | - | - | - | no location in <i>F.vesca</i><br>genome                  |
|         | miR1511c | AACAGGCUCUGAUACCAAU<br>UG  | 21 | 441        | 12415       | 12922       | 105        | 37         | 0  | 29.19        | 960.33        | 1037.15       | 8.74         | 1.91       | 0    | 0.07      | - | - | - | - | - | - | - | no location in <i>F.vesca</i><br>genome                  |
|         | miR1511d | CACCGGCUCUGAUACCAAU<br>UG  | 21 | 827        | 12747       | 12338       | 178        | 47         | 0  | 54.73        | 986.01        | 990.28        | 14.81        | 2.42       | 0    | 0.04      | - | - | - | - | - | - | - | no location in <i>F.vesca</i><br>genome                  |
|         | miR1511e | GACCGGCUCUGAUACCAAU<br>UG  | 21 | 2989       | 9731        | 10019       | 1327       | 391        | 0  | 197.81       | 752.71        | 804.15        | 110.4        | 20.16      | 0    | 0.1       | - | - | - | - | - | - | - | no location in <i>F.vesca</i><br>genome                  |
|         | miR1511f | AGCCGGCUCUGAUACCAAU<br>UG  | 21 | 3496       | 7393        | 7437        | 1515       | 430        | 0  | 231.37       | 571.86        | 596.91        | 126.04       | 22.17      | 0    | 0.1       | - | - | - | - | - | - | - | no location in <i>F.vesca</i><br>genome                  |
|         | miR1511g | AACCGGCUCUGAUACCAAU<br>UG  | 21 | 3387       | 6818        | 6815        | 1253       | 366        | 0  | 224.15       | 527.39        | 546.99        | 104.24       | 18.87      | 0    | 0.08      | - | - | - | - | - | - | - | no location in <i>F.vesca</i><br>genome                  |

|          |                           |    |      |      |      |      |      |   |        |        |        |        |       |   |      |   |   |   |   |   |   |   |   |                                         |
|----------|---------------------------|----|------|------|------|------|------|---|--------|--------|--------|--------|-------|---|------|---|---|---|---|---|---|---|---|-----------------------------------------|
| miR1511h | AACCGGCCUGAUACCAAU<br>UG  | 21 | 3056 | 6730 | 5882 | 965  | 345  | 0 | 202.25 | 520.58 | 472.1  | 80.28  | 17.79 | 0 | 0.09 | - | - | - | - | - | - | - | - | no location in <i>F.vesca</i><br>genome |
| miR1511i | AACCGGCUCUGAUACCAAU<br>UU | 21 | 6766 | 7076 | 7891 | 2349 | 1593 | 0 | 447.77 | 547.34 | 633.35 | 195.43 | 82.14 | 0 | 0.18 | - | - | - | - | - | - | - | - | no location in <i>F.vesca</i><br>genome |
| miR1511j | UACCGGCUCUGAUACCAAU<br>UG | 21 | 1634 | 5097 | 4500 | 769  | 61   | 0 | 108.14 | 394.26 | 361.18 | 63.98  | 3.15  | 0 | 0.03 | - | - | - | - | - | - | - | - | no location in <i>F.vesca</i><br>genome |
| miR1511k | AACCGGCUCUGAUACCGAU<br>UG | 21 | 2799 | 5298 | 5050 | 950  | 263  | 0 | 185.24 | 409.81 | 405.33 | 79.04  | 13.56 | 0 | 0.07 | - | - | - | - | - | - | - | - | no location in <i>F.vesca</i><br>genome |
| miR1511l | AACCGGCUCUGAUACCAAU<br>UG | 21 | 2678 | 5266 | 5080 | 909  | 255  | 0 | 177.23 | 407.34 | 407.73 | 75.63  | 13.15 | 0 | 0.07 | - | - | - | - | - | - | - | - | no location in <i>F.vesca</i><br>genome |
| miR1511m | AACCGGCUCUGAUACCAAU<br>UC | 21 | 3622 | 5781 | 5439 | 1047 | 386  | 0 | 239.7  | 447.17 | 436.55 | 87.11  | 19.9  | 0 | 0.08 | - | - | - | - | - | - | - | - | no location in <i>F.vesca</i><br>genome |
| miR1511n | AACCAGCUCUGAUACCAAU<br>UG | 21 | 3382 | 4380 | 4466 | 765  | 348  | 0 | 223.82 | 338.8  | 358.45 | 63.65  | 17.94 | 0 | 0.08 | - | - | - | - | - | - | - | - | no location in <i>F.vesca</i><br>genome |
| miR1511o | AACCGGCUCUGAUGCCAAU<br>UG | 21 | 2123 | 4059 | 4293 | 814  | 239  | 0 | 140.5  | 313.97 | 344.57 | 67.72  | 12.32 | 0 | 0.09 | - | - | - | - | - | - | - | - | no location in <i>F.vesca</i><br>genome |
| miR1511p | AACCGGCUCUGAUACCAGU<br>UG | 21 | 1798 | 4038 | 3934 | 682  | 182  | 0 | 118.99 | 312.35 | 315.75 | 56.74  | 9.38  | 0 | 0.08 | - | - | - | - | - | - | - | - | no location in <i>F.vesca</i><br>genome |
| miR1511q | AACCGGCUCUGACACCAAU<br>UG | 21 | 1837 | 3524 | 3321 | 590  | 186  | 0 | 121.57 | 272.59 | 266.55 | 49.09  | 9.59  | 0 | 0.08 | - | - | - | - | - | - | - | - | no location in <i>F.vesca</i><br>genome |
| miR1511r | AACUGGCUCUGAUACCAAU<br>UG | 21 | 1433 | 3388 | 3283 | 508  | 147  | 0 | 94.84  | 262.07 | 263.5  | 42.26  | 7.58  | 0 | 0.08 | - | - | - | - | - | - | - | - | no location in <i>F.vesca</i><br>genome |
| miR1511s | AACCGGCUCUGAUACCAAU<br>CG | 21 | 2012 | 4251 | 4190 | 575  | 187  | 0 | 133.15 | 328.82 | 336.3  | 47.84  | 9.64  | 0 | 0.07 | - | - | - | - | - | - | - | - | no location in <i>F.vesca</i><br>genome |
| miR1511t | AACGGGCUCUGAUACCAAU<br>UG | 21 | 384  | 2600 | 2784 | 106  | 39   | 0 | 25.41  | 201.12 | 223.45 | 8.82   | 2.01  | 0 | 0.08 | - | - | - | - | - | - | - | - | no location in <i>F.vesca</i><br>genome |
| miR1511u | AACCGGCUCUGAUACCAAC<br>UG | 21 | 1234 | 2661 | 2436 | 454  | 72   | 0 | 81.67  | 205.83 | 195.52 | 37.77  | 3.71  | 0 | 0.05 | - | - | - | - | - | - | - | - | no location in <i>F.vesca</i><br>genome |
| miR1511v | AACCGGCUCUGAUACCCAU<br>UG | 21 | 681  | 2319 | 2134 | 161  | 37   | 0 | 45.07  | 179.38 | 171.28 | 13.39  | 1.91  | 0 | 0.04 | - | - | - | - | - | - | - | - | no location in <i>F.vesca</i><br>genome |
| miR1511w | AACCGACUCUGAUACCAAU<br>UG | 21 | 1053 | 2086 | 2064 | 352  | 137  | 0 | 69.69  | 161.36 | 165.66 | 29.29  | 7.06  | 0 | 0.1  | - | - | - | - | - | - | - | - | no location in <i>F.vesca</i><br>genome |

|           |                                      |    |      |      |      |      |      |      |        |        |        |        |            |            |           |   |   |   |   |   |   |   |   |                                                          |
|-----------|--------------------------------------|----|------|------|------|------|------|------|--------|--------|--------|--------|------------|------------|-----------|---|---|---|---|---|---|---|---|----------------------------------------------------------|
| miR1511x  | AACCGGCUCUGAUACUAAU<br>UG            | 21 | 1024 | 2031 | 1775 | 435  | 88   | 0    | 67.77  | 157.1  | 142.47 | 36.19  | 4.54       | 0          | 0.07      | - | - | - | - | - | - | - | - | no location in <i>F.vesca</i><br>genome                  |
| miR1511y  | AAACGGCUCUGAUACCAAU<br>UG            | 21 | 137  | 334  | 270  | 1888 | 111  | 0    | 9.07   | 25.84  | 21.67  | 157.07 | 5.72       | 0          | 0.63      | - | - | - | - | - | - | - | - | no location in <i>F.vesca</i><br>genome                  |
| miR1511z  | AACCGGUUCUGAUACCAAU<br>UG            | 21 | 1154 | 1852 | 1676 | 331  | 109  | 0    | 76.37  | 143.26 | 134.52 | 27.54  | 5.62       | 0          | 0.07      | - | - | - | - | - | - | - | - | no location in <i>F.vesca</i><br>genome                  |
| miR1511aa | AACCCGCUCUGAUACCAAU<br>UG            | 21 | 1793 | 2293 | 2223 | 301  | 194  | 0    | 118.66 | 177.37 | 178.42 | 25.04  | 10         | 0          | 0.08      | - | - | - | - | - | - | - | - | no location in <i>F.vesca</i><br>genome                  |
| miR1511ab | AACCGGCUCUGAUAUCAAU<br>UG            | 21 | 972  | 1599 | 1552 | 357  | 93   | 0    | 64.33  | 123.69 | 124.57 | 29.7   | 4.8        | 0          | 0.07      | - | - | - | - | - | - | - | - | no location in <i>F.vesca</i><br>genome                  |
| miR1511ac | AACCGGCUCUAAUACCAAU<br>UG            | 21 | 710  | 1544 | 1407 | 174  | 26   | 0    | 46.99  | 119.43 | 112.93 | 14.48  | 1.34       | 0          | 0.03      | - | - | - | - | - | - | - | - | no location in <i>F.vesca</i><br>genome                  |
| miR1511ad | AACCGGCUCUGAUACCUAU<br>UG            | 21 | 700  | 1486 | 1297 | 209  | 23   | 0    | 46.33  | 114.95 | 104.1  | 17.39  | 1.19       | 0          | 0.03      | - | - | - | - | - | - | - | - | no location in <i>F.vesca</i><br>genome                  |
| miR1511ae | AACCGGCACUGAUACCAAU<br>UG            | 21 | 313  | 1378 | 1242 | 109  | 25   | 0    | 20.71  | 106.59 | 99.69  | 9.07   | 1.29       | 0          | 0.06      | - | - | - | - | - | - | - | - | no location in <i>F.vesca</i><br>genome                  |
| miR1511af | AAUCGGCUCUGAUACCAAU<br>UG            | 21 | 705  | 1389 | 1315 | 296  | 95   | 0    | 46.66  | 107.44 | 105.55 | 24.63  | 4.9        | 0          | 0.11      | - | - | - | - | - | - | - | - | no location in <i>F.vesca</i><br>genome                  |
| miR1513   | miR1513<br>UUAAUAUGUAAGAAGUCC<br>UUG | 22 | 0    | 0    | 0    | 0    | 0    | 3335 | 0      | 0      | 0      | 0      | 0          | 177.<br>94 | Both<br>0 | - | - | - | - | - | - | - | - | no location in <i>F.vesca</i><br>genome                  |
| miR1861   | miR1861<br>UCGAUCUUGUGAGCAGACU<br>GU | 21 | 0    | 0    | 0    | 0    | 7360 | 0    | 0      | 0      | 0      | 0      | 379.4<br>9 | 0          | >> 1      | - | - | - | - | - | - | - | - | no location in <i>F.vesca</i><br>genome                  |
| miR3437   | miR3437<br>CCUGGACUUGUAUUUUUGU<br>AC | 21 | 5580 | 6672 | 3842 | 1765 | 194  | 0    | 369.28 | 516.09 | 308.37 | 146.84 | 10         | 0          | 0.03      | - | - | - | - | - | - | - | - | no location in <i>F.vesca</i><br>genome                  |
| miR3449   | miR3449<br>UGAUAGAACAUGUAGAUAA       | 19 | 0    | 0    | 0    | 1806 | 0    | 2714 | 0      | 0      | 0      | 150.25 | 0          | 144.<br>81 | Both<br>0 | - | - | - | - | - | - | - | - | no location in <i>F.vesca</i><br>genome                  |
| miR3522   | miR3522<br>UAGACCAAUUGACAGCUCU<br>GU | 21 | 0    | 0    | 0    | 5008 | 0    | 0    | 0      | 0      | 0      | 416.65 | 0          | 0          | Both<br>0 | - | - | - | - | - | - | - | - | no location in <i>F.vesca</i><br>genome                  |
| miR3633   | miR3633<br>UCCCUAUCCACCUAUUCC<br>CCA | 22 | 1215 | 2017 | 2048 | 288  | 0    | 0    | 80.41  | 156.02 | 164.38 | 23.96  | 0          | 0          | 0         | - | - | - | - | - | - | - | - | LG4:24750978:24751<br>080:- 103(nt) -<br>46.60(kcal/mol) |

|         |          |                              |    |           |       |       |      |      |      |             |        |         |        |            |           |           |   |   |   |   |   |   |   |   |                                                         |
|---------|----------|------------------------------|----|-----------|-------|-------|------|------|------|-------------|--------|---------|--------|------------|-----------|-----------|---|---|---|---|---|---|---|---|---------------------------------------------------------|
| miR3708 | miR3708  | UCACAAAGAUGUCGUCGUA<br>UA    | 21 | 0         | 0     | 0     | 1515 | 0    | 0    | 0           | 0      | 0       | 126.04 | 0          | 0         | Both<br>0 | - | - | - | - | - | - | - | - | no location in <i>F.vesca</i><br>genome                 |
| miR4380 | miR4380  | CGAUUGUUGAUCCGAAUGU<br>UGAUC | 24 | 0         | 1846  | 0     | 0    | 0    | 0    | 0           | 142.79 | 0       | 0      | 0          | 0         | Both<br>0 | - | - | - | - | - | - | - | - | no location in <i>F.vesca</i><br>genome                 |
| miR4398 | miR4398  | UCUCAGCGGAGGAGAAAGG<br>AC    | 21 | 0         | 0     | 0     | 1468 | 0    | 0    | 0           | 0      | 0       | 122.13 | 0          | 0         | Both<br>0 | - | - | - | - | - | - | - | - | no location in <i>F.vesca</i><br>genome                 |
| miR4414 | miR4414  | UCGCAAGGAUGCGGAGCGU<br>GA    | 21 | 0         | 0     | 0     | 0    | 2835 | 0    | 0           | 0      | 0       | 0      | 146.1<br>8 | 0         | >> 1      | - | - | - | - | - | - | - | - | no location in <i>F.vesca</i><br>genome                 |
| miR5213 | miR5213  | UGCGAGUGUCUACCUCU<br>GAA     | 22 | 6672      | 11410 | 8441  | 3284 | 627  | 0    | 441.55      | 882.59 | 677.5   | 273.22 | 32.33      | 0         | 0.07      | - | - | - | - | - | - | - | - | LG0:1732175:173227<br>3:+ 99(nt) -<br>45.92(kcal/mol)   |
| miR5258 | miR5258  | UCAAGCUGACAAAGAAGAC<br>UG    | 21 | 0         | 0     | 0     | 2082 | 0    | 0    | 0           | 0      | 0       | 173.21 | 0          | 0         | Both<br>0 | - | - | - | - | - | - | - | - | no location in <i>F.vesca</i><br>genome                 |
| miR5260 | miR5260  | UUUGACUGUUGCUC AUGGC<br>CU   | 21 | 0         | 0     | 0     | 9956 | 0    | 1225 | 0           | 0      | 0       | 828.3  | 0          | 65.3<br>6 | Both<br>0 | - | - | - | - | - | - | - | - | no location in <i>F.vesca</i><br>genome                 |
| miR5289 | miR5289a | CGGAAAACUGAAAUCGGC<br>GG     | 21 | 1789      | 1966  | 3100  | 1830 | 0    | 0    | 118.4       | 152.07 | 248.81  | 152.25 | 0          | 0         | 0         | - | - | - | - | - | - | - | - | no location in <i>F.vesca</i><br>genome                 |
|         | miR5289b | CGGAAAACUGGAAUCGGC<br>GG     | 21 | 2687      | 2587  | 2388  | 1915 | 0    | 0    | 177.83      | 200.11 | 191.67  | 159.32 | 0          | 0         | 0         | - | - | - | - | - | - | - | - | no location in <i>F.vesca</i><br>genome                 |
| miR5290 | miR5290a | UUGGAGAGAGAGUAGACAA<br>UG    | 21 | 2173<br>6 | 60200 | 75632 | 7838 | 4658 | 0    | 1438.4<br>9 | 4656.6 | 6070.42 | 652.09 | 240.1<br>7 | 0         | 0.17      | - | - | - | - | - | - | - | - | LG6:12165629:12165<br>718:+ 90(nt) -<br>61.00(kcal/mol) |
|         | miR5290b | UUGGAGAGAGAGUAGACAU<br>UG    | 21 | 218       | 1027  | 1515  | 37   | 0    | 0    | 14.43       | 79.44  | 121.6   | 3.08   | 0          | 0         | 0         | - | - | - | - | - | - | - | - | no location in <i>F.vesca</i><br>genome                 |
|         | miR5290c | UUGGAGAGAGAGUAGACAA<br>UA    | 21 | 323       | 713   | 1249  | 122  | 19   | 0    | 21.38       | 55.15  | 100.25  | 10.15  | 0.98       | 0         | 0.05      | - | - | - | - | - | - | - | - | no location in <i>F.vesca</i><br>genome                 |
| miR5642 | miR5642  | UCUCGCAGCUUGUAGGUGC<br>U     | 20 | 0         | 0     | 0     | 1243 | 0    | 0    | 0           | 0      | 0       | 103.41 | 0          | 0         | Both<br>0 | - | - | - | - | - | - | - | - | no location in <i>F.vesca</i><br>genome                 |
| miR5643 | miR5643  | UGGCUCUUUAAGAUCGGCU<br>GG    | 21 | 0         | 0     | 0     | 2855 | 0    | 0    | 0           | 0      | 0       | 237.53 | 0          | 0         | Both<br>0 | - | - | - | - | - | - | - | - | no location in <i>F.vesca</i><br>genome                 |
| miR5656 | miR5656  | UCGAAGUGGAGAUUGUGUU<br>UU    | 21 | 0         | 0     | 0     | 6027 | 0    | 0    | 0           | 0      | 0       | 501.42 | 0          | 0         | Both<br>0 | - | - | - | - | - | - | - | - | no location in <i>F.vesca</i><br>genome                 |

|         |          |                             |    |            |            |             |            |           |           |              |              |              |              |             |            |           |   |   |   |   |   |   |   |   |                                                           |
|---------|----------|-----------------------------|----|------------|------------|-------------|------------|-----------|-----------|--------------|--------------|--------------|--------------|-------------|------------|-----------|---|---|---|---|---|---|---|---|-----------------------------------------------------------|
| miR5663 | miR5663  | UGAGAAAUGCAACUCUUA<br>GCG   | 22 | 0          | 0          | 0           | 1243       | 0         | 0         | 0            | 0            | 0            | 103.41       | 0           | 0          | Both<br>0 | - | - | - | - | - | - | - | - | no location in <i>F.vesca</i><br>genome                   |
| miR5813 | miR5813  | AAGACAGCAGGACGGUGGU<br>CAUG | 23 | 445        | 976        | 1953        | 417        | 125       | 0         | 29.45        | 75.5         | 156.75       | 34.69        | 6.45        | 0          | 0.22      | - | - | - | - | - | - | - | - | LG6:19667808:19668<br>129:- 322(nt) -<br>116.50(kcal/mol) |
| miR6103 | miR6103  | UUGUUCAGACAACCCUGGG<br>AAC  | 22 | 0          | 0          | 0           | 1554       | 0         | 0         | 0            | 0            | 0            | 129.29       | 0           | 0          | Both<br>0 | - | - | - | - | - | - | - | - | no location in <i>F.vesca</i><br>genome                   |
| miR6437 | miR6437  | UCACGGACGGUAGGCUUGA<br>AGC  | 22 | 0          | 0          | 0           | 2637       | 0         | 0         | 0            | 0            | 0            | 219.39       | 0           | 0          | Both<br>0 | - | - | - | - | - | - | - | - | no location in <i>F.vesca</i><br>genome                   |
| miR7484 | miR7484  | UAGAGUCCGAAUUGAAUU<br>UGUA  | 23 | 0          | 105        | 92          | 1289       | 1922      | 1144<br>0 | 0            | 8.12         | 7.38         | 107.24       | 99.1        | 610.<br>38 | >> 1      | - | - | - | - | - | - | - | - | no location in <i>F.vesca</i><br>genome                   |
| miR7708 | miR7708  | UGUAAUGACUGCACAAGAC<br>UGC  | 22 | 706        | 1349       | 328         | 389        | 349       | 0         | 46.72        | 104.35       | 26.33        | 32.36        | 17.99       | 0          | 0.39      | - | - | - | - | - | - | - | - | no location in <i>F.vesca</i><br>genome                   |
| miR7732 | miR7732  | UCGAGAUCUUGGAGGGGAC<br>CC   | 21 | 0          | 0          | 0           | 0          | 2766      | 0         | 0            | 0            | 0            | 0            | 142.6<br>2  | 0          | >> 1      | - | - | - | - | - | - | - | - | no location in <i>F.vesca</i><br>genome                   |
| miR7767 | miR7767  | CCAAGAUGAGUGCUCUCCU         | 19 | 826        | 2702       | 5262        | 398        | 558       | 0         | 54.66        | 209.01       | 422.34       | 33.11        | 28.77       | 0          | 0.53      | - | - | - | - | - | - | - | - | no location in <i>F.vesca</i><br>genome                   |
| miR7782 | miR7782a | ACCUAGCUCUGAUACCAUG<br>UG   | 21 | 4562<br>24 | 95828<br>1 | 11522<br>48 | 1746<br>72 | 4751<br>5 | 25        | 30192.<br>92 | 74124.9<br>9 | 92482.4<br>1 | 14532.<br>05 | 2449.<br>94 | 1.33       | 0.08      | - | - | - | - | - | - | - | - | LG5:1343333:134343<br>1:- 99(nt) -<br>40.80(kcal/mol)     |
|         | miR7782b | ACCUAGCUCUGAUACCAUG<br>UA   | 21 | 1024<br>1  | 23403      | 31163       | 3791       | 611       | 0         | 677.75       | 1810.27      | 2501.22      | 315.4        | 31.5        | 0          | 0.05      | - | - | - | - | - | - | - | - | no location in <i>F.vesca</i><br>genome                   |
|         | miR7782c | ACCCAGCUCUGAUACCAUG<br>UG   | 21 | 1539       | 8316       | 12863       | 422        | 82        | 0         | 101.85       | 643.26       | 1032.42      | 35.11        | 4.23        | 0          | 0.04      | - | - | - | - | - | - | - | - | no location in <i>F.vesca</i><br>genome                   |
|         | miR7782d | CCCUAGCUCUGAUACCAUG<br>UG   | 21 | 379        | 8797       | 9779        | 62         | 18        | 0         | 25.08        | 680.47       | 784.89       | 5.16         | 0.93        | 0          | 0.04      | - | - | - | - | - | - | - | - | no location in <i>F.vesca</i><br>genome                   |
|         | miR7782e | ACCUAGCUCUGAUACCAUG<br>UC   | 21 | 4812       | 8817       | 10659       | 1673       | 251       | 0         | 318.46       | 682.01       | 855.52       | 139.19       | 12.94       | 0          | 0.04      | - | - | - | - | - | - | - | - | no location in <i>F.vesca</i><br>genome                   |
|         | miR7782f | ACCUAGCUCUGAUACCAUG<br>UU   | 21 | 3501       | 5551       | 9757        | 1548       | 485       | 0         | 231.7        | 429.38       | 783.12       | 128.79       | 25.01       | 0          | 0.11      | - | - | - | - | - | - | - | - | no location in <i>F.vesca</i><br>genome                   |
|         | miR7782g | GCCUAGCUCUGAUACCAUG<br>UG   | 21 | 1695       | 7327       | 8029        | 600        | 124       | 0         | 112.18       | 566.76       | 644.43       | 49.92        | 6.39        | 0          | 0.06      | - | - | - | - | - | - | - | - | no location in <i>F.vesca</i><br>genome                   |



|          |                            |    |      |      |      |      |     |   |        |        |        |        |       |   |      |   |   |   |   |   |   |   |   |                                         |
|----------|----------------------------|----|------|------|------|------|-----|---|--------|--------|--------|--------|-------|---|------|---|---|---|---|---|---|---|---|-----------------------------------------|
| miR7782h | ACCUAGCUCUGAUACCAUG<br>CG  | 21 | 2416 | 5701 | 7540 | 930  | 215 | 0 | 159.89 | 440.98 | 605.18 | 77.37  | 11.09 | 0 | 0.07 | - | - | - | - | - | - | - | - | no location in <i>F.vesca</i><br>genome |
| miR7782i | ACCUAGCUCUGGUACCAUG<br>UG  | 21 | 1380 | 3709 | 4209 | 574  | 94  | 0 | 91.33  | 286.9  | 337.83 | 47.75  | 4.85  | 0 | 0.05 | - | - | - | - | - | - | - | - | no location in <i>F.vesca</i><br>genome |
| miR7782j | ACCAAGCUCUGAUACCAUG<br>UG  | 21 | 366  | 2573 | 4166 | 84   | 15  | 0 | 24.22  | 199.03 | 334.37 | 6.99   | 0.77  | 0 | 0.03 | - | - | - | - | - | - | - | - | no location in <i>F.vesca</i><br>genome |
| miR7782k | UCCUAGCUCUGAUACCAUG<br>UG  | 21 | 670  | 4020 | 4087 | 274  | 27  | 0 | 44.34  | 310.96 | 328.03 | 22.8   | 1.39  | 0 | 0.03 | - | - | - | - | - | - | - | - | no location in <i>F.vesca</i><br>genome |
| miR7782l | ACCUAGCUCUGAUACCACG<br>UG  | 21 | 1565 | 3768 | 4358 | 512  | 87  | 0 | 103.57 | 291.46 | 349.78 | 42.6   | 4.49  | 0 | 0.04 | - | - | - | - | - | - | - | - | no location in <i>F.vesca</i><br>genome |
| miR7782m | ACCUAGCCCUGAUACCAUG<br>UG  | 21 | 1643 | 3260 | 4065 | 526  | 111 | 0 | 108.73 | 252.17 | 326.27 | 43.76  | 5.72  | 0 | 0.05 | - | - | - | - | - | - | - | - | no location in <i>F.vesca</i><br>genome |
| miR7782n | ACCUAGCUCCGAUACCAUG<br>UG  | 21 | 1504 | 3114 | 3798 | 498  | 70  | 0 | 99.53  | 240.87 | 304.84 | 41.43  | 3.61  | 0 | 0.04 | - | - | - | - | - | - | - | - | no location in <i>F.vesca</i><br>genome |
| miR7782o | ACCUAGCUCUGAUACCGUG<br>UG  | 21 | 1331 | 3173 | 3608 | 464  | 83  | 0 | 88.09  | 245.44 | 289.59 | 38.6   | 4.28  | 0 | 0.05 | - | - | - | - | - | - | - | - | no location in <i>F.vesca</i><br>genome |
| miR7782p | ACCUAGCUCUGAUGCCAUG<br>UG  | 21 | 951  | 2422 | 2884 | 389  | 65  | 0 | 62.94  | 187.35 | 231.48 | 32.36  | 3.35  | 0 | 0.05 | - | - | - | - | - | - | - | - | no location in <i>F.vesca</i><br>genome |
| miR7782q | ACCUGGCUCUGAUACCAUG<br>UG  | 21 | 1208 | 2264 | 2785 | 410  | 72  | 0 | 79.95  | 175.13 | 223.53 | 34.11  | 3.71  | 0 | 0.05 | - | - | - | - | - | - | - | - | no location in <i>F.vesca</i><br>genome |
| miR7782r | ACCUAGCUCUGACACCAUG<br>UG  | 21 | 817  | 2028 | 2394 | 268  | 59  | 0 | 54.07  | 156.87 | 192.15 | 22.3   | 3.04  | 0 | 0.06 | - | - | - | - | - | - | - | - | no location in <i>F.vesca</i><br>genome |
| miR7782s | ACCUAGCUCUGAUACCAUG<br>GG  | 21 | 1238 | 2052 | 2586 | 422  | 63  | 0 | 81.93  | 158.73 | 207.56 | 35.11  | 3.25  | 0 | 0.04 | - | - | - | - | - | - | - | - | no location in <i>F.vesca</i><br>genome |
| miR7782t | ACCUAGCUCUGAUACCAUA<br>UGU | 22 | 426  | 1138 | 1400 | 1944 | 27  | 0 | 28.19  | 88.03  | 112.37 | 161.73 | 1.39  | 0 | 0.05 | - | - | - | - | - | - | - | - | no location in <i>F.vesca</i><br>genome |
| miR7782u | AUCUAGCUCUGAUACCAUG<br>UG  | 21 | 663  | 1311 | 1517 | 309  | 61  | 0 | 43.88  | 101.41 | 121.76 | 25.71  | 3.15  | 0 | 0.07 | - | - | - | - | - | - | - | - | no location in <i>F.vesca</i><br>genome |
| miR7782v | ACCUAGCUCUGAUACUAUG<br>UG  | 21 | 454  | 1215 | 1259 | 817  | 99  | 0 | 30.05  | 93.98  | 101.05 | 67.97  | 5.1   | 0 | 0.17 | - | - | - | - | - | - | - | - | no location in <i>F.vesca</i><br>genome |
| miR7782w | ACCUAACUCUGAUACCAUG<br>UG  | 21 | 406  | 1049 | 1288 | 139  | 28  | 0 | 26.87  | 81.14  | 103.38 | 11.56  | 1.44  | 0 | 0.05 | - | - | - | - | - | - | - | - | no location in <i>F.vesca</i><br>genome |

|         |         |                              |    |      |       |       |      |      |      |        |         |        |        |            |            |           |   |   |   |   |   |   |   |   |                                                        |
|---------|---------|------------------------------|----|------|-------|-------|------|------|------|--------|---------|--------|--------|------------|------------|-----------|---|---|---|---|---|---|---|---|--------------------------------------------------------|
| miR7984 | miR7984 | UCCGACUUUGUGAAAUGAC<br>UU    | 21 | 6662 | 13026 | 14024 | 4851 | 2668 | 0    | 440.89 | 1007.59 | 1125.6 | 403.58 | 137.5<br>7 | 0          | 0.31      | - | - | - | - | - | - | - | - | no location in <i>F.vesca</i><br>genome                |
| miR8033 | miR8033 | UCAAUUCUGACUUUAGGGG<br>C     | 20 | 0    | 0     | 0     | 7073 | 0    | 3024 | 0      | 0       | 0      | 588.45 | 0          | 161.<br>35 | Both<br>0 | - | - | - | - | - | - | - | - | no location in <i>F.vesca</i><br>genome                |
| miR8122 | miR8122 | UUCGACAAGACUUUUCUC<br>UU     | 21 | 0    | 0     | 0     | 0    | 2937 | 0    | 0      | 0       | 0      | 0      | 151.4<br>4 | 0          | >> 1      | - | - | - | - | - | - | - | - | no location in <i>F.vesca</i><br>genome                |
| miR8175 | miR8175 | UUCCCGCAAUGGAACCA            | 18 | 143  | 717   | 1284  | 1838 | 808  | 0    | 9.46   | 55.46   | 103.06 | 152.91 | 41.66      | 0          | 4.4       | - | - | - | - | - | - | - | - | no location in <i>F.vesca</i><br>genome                |
| miR8183 | miR8183 | UUUCAGUUCGAAGGAUUGU<br>G     | 20 | 0    | 0     | 0     | 3775 | 208  | 524  | 0      | 0       | 0      | 314.07 | 10.72      | 27.9<br>6  | >> 1      | - | - | - | - | - | - | - | - | no location in <i>F.vesca</i><br>genome                |
| miR8581 | miR8581 | UGGAAAUUCUUGUAUGCAC<br>GACGU | 24 | 2250 | 1503  | 0     | 0    | 0    | 0    | 148.91 | 116.26  | 0      | 0      | 0          | 0          | 0         | - | - | - | - | - | - | - | - | LG3:4764161:476433<br>9:- 179(nt) -<br>27.50(kcal/mol) |
| miR8666 | miR8666 | UUUGGUGAUUAGACGUAA<br>AU     | 21 | 0    | 0     | 0     | 4065 | 0    | 0    | 0      | 0       | 0      | 338.19 | 0          | 0          | Both<br>0 | - | - | - | - | - | - | - | - | no location in <i>F.vesca</i><br>genome                |
| miR8781 | miR8781 | UUUGAUUGUGAAGUUUGAC<br>GGAGA | 24 | 1734 | 0     | 0     | 0    | 0    | 0    | 114.76 | 0       | 0      | 0      | 0          | 0          | 0         | - | - | - | - | - | - | - | - | LG1:4166047:416629<br>3:+ 247(nt) -<br>53.20(kcal/mol) |
| miR9472 | miR9472 | UUCCAAUCUCUGAUACAAU<br>G     | 20 | 0    | 0     | 0     | 0    | 4480 | 0    | 0      | 0       | 0      | 0      | 230.9<br>9 | 0          | >> 1      | - | - | - | - | - | - | - | - | no location in <i>F.vesca</i><br>genome                |
| miR9653 | miR9653 | ACCAAGAUCUCUGAGGUCU          | 19 | 0    | 1703  | 2576  | 0    | 0    | 0    | 0      | 131.73  | 206.76 | 0      | 0          | 0          | Both<br>0 | - | - | - | - | - | - | - | - | no location in <i>F.vesca</i><br>genome                |
| miR9767 | miR9767 | UGAAAAGGACUUUGAAAAA<br>AG    | 21 | 0    | 0     | 3088  | 0    | 0    | 0    | 0      | 0       | 247.85 | 0      | 0          | 0          | Both<br>0 | - | - | - | - | - | - | - | - | no location in <i>F.vesca</i><br>genome                |

Note : T1, T2, T3, and T4 indicated that after inoculation, red ripening fruits were chose and took at 48 h, 72 h, 96 h and 120 h, respectively. CK1 indicated that red ripening fruits were took from strawberry plants treated with sterile water. CK2 indicates *B. cinerea*. The abbreviations represent: fan, *Fragaria ananassa*; ath, *Arabidopsis thaliana*; osa, *Oryza sativa*; ptc, *Populus trichocarpa*; vvi, *Vitis vinifera*; ctr, *Citrus trifoliata*; csi, *Citrus sinensi*; mdm, *Malus domestic*. The plus symbols indicate: ++, miRNA sequences of strawberry were identical exactly to those in other species; +, miRNA sequences of strawberry were highly conserved in other species but have four or fewer variations in some nucleotide positions.

**Table S2** The ratios of the 51 most abundant conserved miRNAs between the infected libraries and CK1

| Conserved miRNA Name | Ratio  |        |        |        |
|----------------------|--------|--------|--------|--------|
|                      | T1/CK1 | T2/CK1 | T3/CK1 | T4/CK1 |
| miR156               | 3.13   | 1.68   | 1.83   | 0.39   |
| miR157               | 2.66   | 2.52   | 2.15   | 0.51   |
| miR159               | 3.36   | 4.532  | 0.49   | 0.14   |
| miR162               | 1.04   | 1.08   | 0.04   | 0.02   |
| miR164               | 6.57   | 7.72   | 0.54   | 0.18   |
| miR166               | 2.86   | 3.5    | 1.11   | 0.2    |
| miR167               | 2.21   | 2.7    | 0.18   | 0.02   |
| miR319               | 3.14   | 2.21   | 0.76   | 0.17   |
| miR395               | 0.43   | 0.85   | 0.1    | 0.06   |
| miR396               | 1.54   | 1.66   | 0.24   | 0.09   |
| miR398               | 3.03   | 0.81   | 0      | 0.06   |
| miR399               | 1.66   | 2.84   | 0.08   | 0.05   |
| miR408               | 2.42   | 2.56   | 0.35   | 0.21   |
| miR477               | 2.42   | 1.75   | 0.39   | 0.27   |
| miR482               | 2.89   | 4.05   | 0.17   | 0.02   |
| miR1026              | >> 1   | >> 1   | Both 0 | Both 0 |
| miR1511              | 2.13   | 2.19   | 0.48   | 0.11   |
| miR1861              | Both 0 | Both 0 | Both 0 | >> 1   |
| miR3437              | 1.4    | 0.84   | 0.4    | 0.03   |
| miR3522              | Both 0 | Both 0 | >> 1   | Both 0 |
| miR3633              | 1.94   | 2.04   | 0.3    | >> 1   |
| miR3708              | Both 0 | Both 0 | >> 1   | Both 0 |
| miR4380              | >> 1   | Both 0 | Both 0 | Both 0 |
| miR4398              | Both 0 | Both 0 | >> 1   | Both 0 |
| miR4414              | Both 0 | Both 0 | Both 0 | >> 1   |
| miR5213              | 2      | 1.53   | 0.62   | 0.07   |
| miR5258              | Both 0 | Both 0 | >> 1   | Both 0 |
| miR5260              | Both 0 | Both 0 | >> 1   | Both 0 |
| miR5289              | 1.19   | 1.49   | 1.05   | >> 1   |
| miR5290              | 3.25   | 4.27   | 0.45   | 0.16   |
| miR5642              | Both 0 | Both 0 | >> 1   | Both 0 |
| miR5643              | Both 0 | Both 0 | >> 1   | Both 0 |
| miR5656              | Both 0 | Both 0 | >> 1   | Both 0 |
| miR5663              | Both 0 | Both 0 | >> 1   | Both 0 |
| miR5813              | 2.56   | 5.32   | 1.18   | 0.22   |
| miR6103              | Both 0 | Both 0 | >> 1   | Both 0 |
| miR6437              | Both 0 | Both 0 | >> 1   | Both 0 |
| miR7708              | 2.23   | 0.56   | 0.7    | 0.39   |
| miR7732              | Both 0 | Both 0 | Both 0 | >> 1   |
| miR7767              | 3.82   | 7.73   | 0.61   | 0.53   |
| miR7782              | 2.51   | 3.15   | 0.49   | 0.08   |

|         |        |        |        |        |
|---------|--------|--------|--------|--------|
| miR7984 | 2.29   | 2.55   | 0.92   | 0.31   |
| miR8122 | Both 0 | Both 0 | Both 0 | >> 1   |
| miR8175 | 5.86   | 10.9   | 16.16  | 4.4    |
| miR8183 | Both 0 | Both 0 | >> 1   | >> 1   |
| miR8581 | 0.78   | 0      | 0      | >> 1   |
| miR8666 | Both 0 | Both 0 | >> 1   | Both 0 |
| miR8781 | 0      | 0      | 0      | >> 1   |
| miR9472 | Both 0 | Both 0 | Both 0 | >> 1   |
| miR9653 | >> 1   | >> 1   | Both 0 | Both 0 |
| miR9767 | Both 0 | >> 1   | Both 0 | Both 0 |

**Table S3** The ratios of 35 novel miRNAs between infected libraries and CK1

| Novel miRNA Name | Ratio  |        |        |        |
|------------------|--------|--------|--------|--------|
|                  | T1/CK1 | T2/CK1 | T3/CK1 | T4/CK1 |
| fan-novel-001    | 2.49   | 1.53   | 0      | 0.04   |
| fan-novel-002    | Both 0 | Both 0 | >> 1   | Both 0 |
| fan-novel-003    | 3.3    | 1      | 0.8    | 0.67   |
| fan-novel-004    | 4.08   | 5.18   | 0.66   | 0      |
| fan-novel-005    | 4.05   | 3.83   | 0      | 0      |
| fan-novel-006    | 4.56   | 1.5    | 0.43   | 0      |
| fan-novel-007    | 0      | 0      | 0      | 0.13   |
|                  | 0.86   | 0.8    | 0.7    | 0.13   |
|                  | 0      | 0.79   | 0      | 0.13   |
|                  | 0      | 0.8    | 0      | 0.13   |
|                  | 0      | 0      | 0      | 0.13   |
|                  | 0      | 0.8    | 0      | 0.13   |
|                  | 0.86   | 0.8    | 0.69   | 0.13   |
|                  | 0      | 0.83   | 0      | 0.14   |
|                  | 0.86   | 0.8    | 0.69   | 0.13   |
|                  | 0.86   | 0.8    | 0.69   | 0.13   |
|                  | 0.88   | 0.84   | 0      | 0      |
|                  | Both 0 | Both 0 | >> 1   | >> 1   |
|                  | Both 0 | >> 1   | Both 0 | >> 1   |
|                  | 0      | 0.8    | 0      | 0.13   |
|                  | 0      | 0.8    | 0      | 0.13   |
| fan-novel-008    | Both 0 | Both 0 | Both 0 | >> 1   |
| fan-novel-009    | 1.7    | 0.7    | 0      | 0      |
|                  | 1.7    | 0.7    | 0      | 0      |
| fan-novel-010    | 2.05   | 1.16   | 0.33   | 0      |
|                  | 2.05   | 1.16   | 0.33   | 0      |
| fan-novel-011    | Both 0 | Both 0 | >> 1   | Both 0 |
| fan-novel-012    | >> 1   | Both 0 | Both 0 | >> 1   |

|               |        |        |        |        |
|---------------|--------|--------|--------|--------|
| fan-novel-013 | Both 0 | >> 1   | Both 0 | Both 0 |
| fan-novel-014 | Both 0 | >> 1   | >> 1   | >> 1   |
|               | 3.62   | 0      | 0      | 0      |
| fan-novel-015 | 1.8    | 2      | 0.24   | 0.04   |
| fan-novel-016 | >> 1   | Both 0 | Both 0 | Both 0 |
|               | >> 1   | Both 0 | Both 0 | Both 0 |
| fan-novel-017 | Both 0 | >> 1   | Both 0 | Both 0 |
| fan-novel-018 | 2.16   | 1      | 1.19   | 0      |
| fan-novel-019 | 2.52   | 2.43   | 0.17   | 0      |
| fan-novel-020 | 3.19   | 2.67   | 0.26   | 0      |
| fan-novel-021 | Both 0 | >> 1   | Both 0 | Both 0 |
| fan-novel-022 | 1.76   | 1.83   | 0      | 0      |
|               | Both 0 | Both 0 | >> 1   | Both 0 |
| fan-novel-023 | >> 1   | Both 0 | Both 0 | >> 1   |
|               | 0      | 2.11   | 1.75   | 0      |
| fan-novel-024 | 2.73   | 1.17   | 0.3    | 0.03   |
| fan-novel-025 | 2.51   | 0.93   | 0.24   | 0.22   |
| fan-novel-026 | 2      | 1.42   | 0.52   | 0      |
| fan-novel-027 | 2.32   | 2.32   | 0.62   | 0.26   |
| fan-novel-028 | 2.97   | 3.22   | 0      | 0      |
| fan-novel-029 | 2.57   | 1.15   | 0.66   | 0.1    |
| fan-novel-030 | 1.6    | 2.41   | 0.5    | 0.25   |
| fan-novel-031 | 3.9    | 2.8    | 0.63   | 0      |
| fan-novel-032 | 3.32   | 2.53   | 0      | 0.16   |
| fan-novel-033 | Both 0 | Both 0 | >> 1   | >> 1   |
| fan-novel-034 | 0      | 0      | 0.42   | 0.15   |
| fan-novel-035 | >> 1   | >> 1   | Both 0 | Both 0 |

---

**Table S4: Putative conserved miRNA target genes in infected strawberry fruits**

| Name   | Target gene No.      | Target gene description                                                                             | Possible function  | E value   |
|--------|----------------------|-----------------------------------------------------------------------------------------------------|--------------------|-----------|
| miR156 | gi 470113815         | PREDICTED: pentatricopeptide repeat-containing protein At2g22070-like [Fragaria vesca subsp. vesca] | Null               | 0         |
|        | gi 470122372         | PREDICTED: squamosa promoter-binding-like protein 6-like [Fragaria vesca subsp. vesca]              | Null               | 0         |
|        | gi 470123009         | PREDICTED: squamosa promoter-binding-like protein 13A-like [Fragaria vesca subsp. vesca]            | Null               | 0         |
|        | gi 470137245         | PREDICTED: squamosa promoter-binding-like protein 17-like [Fragaria vesca subsp. vesca]             | Null               | 0         |
|        | gi 470137555         | PREDICTED: squamosa promoter-binding-like protein 13A-like [Fragaria vesca subsp. vesca]            | Null               | 0         |
|        | gi 470138782         | PREDICTED: putative ribonuclease H protein At1g65750-like [Fragaria vesca subsp. vesca]             | Null               | 1.02E-153 |
|        | gi 470145723         | PREDICTED: squamosa promoter-binding-like protein 7-like [Fragaria vesca subsp. vesca]              | Null               | 6.24E-77  |
|        | gi 470149113         | PREDICTED: squamosa promoter-binding-like protein 12-like [Fragaria vesca subsp. vesca]             | Null               | 0         |
|        | gi 470149134         | PREDICTED: uncharacterized protein LOC101314819 [Fragaria vesca subsp. vesca]                       | Null               | 1.18E-158 |
| miR157 | gi 470122372         | PREDICTED: squamosa promoter-binding-like protein 6-like [Fragaria vesca subsp. vesca]              | Null               | 0         |
|        | gi 470123009         | PREDICTED: squamosa promoter-binding-like protein 13A-like [Fragaria vesca subsp. vesca]            | Null               | 0         |
|        | gi 470137245         | PREDICTED: squamosa promoter-binding-like protein 17-like [Fragaria vesca subsp. vesca]             | Null               | 0         |
|        | gi 470137555         | PREDICTED: squamosa promoter-binding-like protein 13A-like [Fragaria vesca subsp. vesca]            | Null               | 0         |
|        | gi 470145723         | PREDICTED: squamosa promoter-binding-like protein 7-like [Fragaria vesca subsp. vesca]              | Null               | 6.24E-77  |
|        | gi 470149113         | PREDICTED: squamosa promoter-binding-like protein 12-like [Fragaria vesca subsp. vesca]             | Null               | 0         |
| miR159 | gi 462407492         | hypothetical protein PRUPE_ppa005691mg [Prunus persica]                                             | Null               | 2.34E-116 |
|        | gi 470103239         | PREDICTED: patatin group A-3-like [Fragaria vesca subsp. vesca]                                     | catalytic activity | 0         |
|        | gi 470111534         | PREDICTED: uncharacterized protein LOC101312896 [Fragaria vesca subsp. vesca]                       | Null               | 3.32E-107 |
|        | gi 470120371         | PREDICTED: uncharacterized protein LOC101301378 [Fragaria vesca subsp. vesca]                       | Null               | 0         |
|        | gi 470141497         | PREDICTED: transcription factor GAMYB-like [Fragaria vesca subsp. vesca]                            | Null               | 0         |
| miR162 | no target in F.vesca |                                                                                                     |                    |           |
| miR164 | gi 462414719         | hypothetical protein PRUPE_ppa008154mg [Prunus persica]                                             | binding            | 0         |
|        | gi 470108395         | PREDICTED: protein SET DOMAIN GROUP 41-like [Fragaria vesca subsp. vesca]                           | Null               | 0         |

|        |              |                                                                                                       |                                                                                     |           |
|--------|--------------|-------------------------------------------------------------------------------------------------------|-------------------------------------------------------------------------------------|-----------|
|        | gi 470110456 | PREDICTED: protein CUP-SHAPED COTYLEDON 2-like [Fragaria vesca subsp. vesca]                          | Null                                                                                | 0         |
|        | gi 470116068 | PREDICTED: NAC domain-containing protein 21/22-like [Fragaria vesca subsp. vesca]                     | multicellular<br>organismal process<br>nucleic acid binding<br>transcription factor | 0         |
|        | gi 470126738 | PREDICTED: NAC domain-containing protein 100-like isoform 2 [Fragaria vesca subsp. vesca]             | activity                                                                            | 0         |
|        | gi 470137039 | PREDICTED: NAC domain-containing protein 100-like [Fragaria vesca subsp. vesca]                       | Null                                                                                | 1.62E-177 |
|        | gi 470138483 | PREDICTED: protein CUP-SHAPED COTYLEDON 2-like [Fragaria vesca subsp. vesca]                          | Null                                                                                | 3.16E-169 |
|        | gi 470143742 | PREDICTED: UDP-glucuronic acid decarboxylase 1-like [Fragaria vesca subsp. vesca]                     | single-organism<br>process                                                          | 5.57E-41  |
| miR166 | gi 470109778 | PREDICTED: homeobox-leucine zipper protein ATHB-8-like [Fragaria vesca subsp. vesca]                  | cell                                                                                | 0         |
|        | gi 470110617 | PREDICTED: homeobox-leucine zipper protein REVOLUTA-like [Fragaria vesca subsp. vesca]                | cell                                                                                | 0         |
|        | gi 470115610 | PREDICTED: homeobox-leucine zipper protein HOX32-like [Fragaria vesca subsp. vesca]                   | reproductive process                                                                | 0         |
|        | gi 470134042 | PREDICTED: homeobox-leucine zipper protein ATHB-15-like [Fragaria vesca subsp. vesca]                 | cell                                                                                | 0         |
| miR167 | gi 470104378 | PREDICTED: auxin response factor 8-like isoform 1 [Fragaria vesca subsp. vesca]                       | cell                                                                                | 0         |
|        | gi 470109879 | PREDICTED: flavin-containing monooxygenase YUCCA6-like [Fragaria vesca subsp. vesca]                  | binding                                                                             | 0         |
|        | gi 470124343 | PREDICTED: mediator of RNA polymerase II transcription subunit 33A-like [Fragaria vesca subsp. vesca] | Null                                                                                | 0         |
|        | gi 470132859 | PREDICTED: AP-3 complex subunit mu-1-like [Fragaria vesca subsp. vesca]                               | transporter activity                                                                | 0         |
| miR319 | gi 470115874 | PREDICTED: transcription factor TCP4-like [Fragaria vesca subsp. vesca]                               | cellular process                                                                    | 0         |
|        | gi 470134668 | PREDICTED: transcription factor TCP4-like [Fragaria vesca subsp. vesca]                               | Null                                                                                | 8.46E-175 |
|        | gi 470141497 | PREDICTED: transcription factor GAMYB-like [Fragaria vesca subsp. vesca]                              | Null                                                                                | 0         |
| miR395 | gi 470119657 | PREDICTED: uncharacterized protein LOC101293764 [Fragaria vesca subsp. vesca]                         | Null                                                                                | 0         |
|        | gi 470119659 | PREDICTED: uncharacterized protein LOC101294054 [Fragaria vesca subsp. vesca]                         | catalytic activity                                                                  | 0         |
|        | gi 470121039 | PREDICTED: ATP sulfurylase 1, chloroplastic-like [Fragaria vesca subsp. vesca]                        | catalytic activity                                                                  | 0         |
|        | gi 470138171 | PREDICTED: sulfate transporter 2.1-like [Fragaria vesca subsp. vesca]                                 | transporter activity                                                                | 0         |
| miR396 | gi 462408375 | hypothetical protein PRUPE_ppa017820mg, partial [Prunus persica]                                      | Null                                                                                | 2.84E-32  |

|        |                      |                                                                                                             |                       |           |
|--------|----------------------|-------------------------------------------------------------------------------------------------------------|-----------------------|-----------|
|        | gi 462417055         | hypothetical protein PRUPE_ppa000616mg [Prunus persica]                                                     | Null                  | 0         |
|        |                      |                                                                                                             | structural molecule   |           |
|        | gi 470103015         | PREDICTED: 50S ribosomal protein L6, chloroplastic-like [Fragaria vesca subsp. vesca]                       | activity              | 1.05E-95  |
|        |                      | PREDICTED: probable cadmium/zinc-transporting ATPase HMA1, chloroplastic-like [Fragaria vesca subsp. vesca] |                       |           |
|        | gi 470103122         |                                                                                                             | cellular process      | 0         |
|        | gi 470103469         | PREDICTED: uncharacterized protein LOC101308800 [Fragaria vesca subsp. vesca]                               | Null                  | 3.30E-27  |
|        | gi 470106672         | PREDICTED: E3 ubiquitin-protein ligase RMA3-like isoform 1 [Fragaria vesca subsp. vesca]                    | Null                  | 9.85E-135 |
|        | gi 470112243         | PREDICTED: uncharacterized protein LOC101299265 [Fragaria vesca subsp. vesca]                               | Null                  | 2.76E-66  |
|        | gi 470118296         | PREDICTED: F-box/kelch-repeat protein At3g06240-like [Fragaria vesca subsp. vesca]                          | Null                  | 1.55E-70  |
|        | gi 470135722         | PREDICTED: putative phospholipid-transporting ATPase 4-like [Fragaria vesca subsp. vesca]                   | binding               | 0         |
|        | gi 470136387         | PREDICTED: sulfite oxidase-like [Fragaria vesca subsp. vesca]                                               | cell                  | 7.06E-107 |
|        | gi 470138838         | PREDICTED: uncharacterized protein LOC101300171 [Fragaria vesca subsp. vesca]                               | Null                  | 5.95E-39  |
|        | gi 470146177         | PREDICTED: pentatricopeptide repeat-containing protein At3g16010-like [Fragaria vesca subsp. vesca]         | Null                  | 1.10E-30  |
|        | gi 470147065         | PREDICTED: uncharacterized protein LOC101291584 [Fragaria vesca subsp. vesca]                               | biological regulation | 5.24E-144 |
| miR398 | no target in F.vesca |                                                                                                             |                       |           |
| miR399 | gi 470107193         | PREDICTED: probable inorganic phosphate transporter 1-7-like [Fragaria vesca subsp. vesca]                  | transporter activity  | 0         |
|        | gi 470111967         | PREDICTED: inorganic phosphate transporter 1-4-like [Fragaria vesca subsp. vesca]                           | localization          | 0         |
|        | gi 470123620         | PREDICTED: probable inorganic phosphate transporter 1-7-like [Fragaria vesca subsp. vesca]                  | localization          | 0         |
|        | gi 470146771         | PREDICTED: inorganic phosphate transporter 1-1-like [Fragaria vesca subsp. vesca]                           | transporter activity  | 0         |
| miR408 | gi 470125412         | PREDICTED: SNARE-interacting protein KEULE-like [Fragaria vesca subsp. vesca]                               | membrane              | 4.95E-88  |
| miR477 | gi 470117875         | PREDICTED: huntingtin-interacting protein K-like [Fragaria vesca subsp. vesca]                              | Null                  | 8.73E-55  |
|        | gi 470146242         | PREDICTED: probable replication factor C subunit 3-like [Fragaria vesca subsp. vesca]                       | binding               | 0         |
|        | gi 470148493         | PREDICTED: DELLA protein GAI1-like [Fragaria vesca subsp. vesca]                                            | Null                  | 0         |
|        | gi 470149296         | PREDICTED: DELLA protein GAI1-like [Fragaria vesca subsp. vesca]                                            | Null                  | 0         |
| miR482 | gi 470105594         | PREDICTED: uncharacterized protein LOC101298839 [Fragaria vesca subsp. vesca]                               | Null                  | 6.43E-24  |
|        | gi 470107037         | PREDICTED: uncharacterized protein LOC101309407 [Fragaria vesca subsp. vesca]                               | Null                  | 1.43E-92  |



|         |                      |                                                                                                     |                      |           |
|---------|----------------------|-----------------------------------------------------------------------------------------------------|----------------------|-----------|
|         | gi 470133027         | PREDICTED: uncharacterized protein LOC101304885 [Fragaria vesca subsp. vesca]                       | Null                 | 0         |
|         | gi 470138241         | PREDICTED: cyclic phosphodiesterase-like [Fragaria vesca subsp. vesca]                              | cell                 | 2.31E-107 |
|         | gi 470146236         | PREDICTED: DNA repair helicase XPB2-like [Fragaria vesca subsp. vesca]                              | Null                 | 3.77E-06  |
| miR1026 | no target in F.vesca |                                                                                                     |                      |           |
| miR1511 | gi 470111852         | PREDICTED: heat shock cognate 70 kDa protein-like [Fragaria vesca subsp. vesca]                     | response to stimulus | 0         |
| miR1861 | no target in F.vesca |                                                                                                     |                      |           |
| miR3437 | gi 470118310         | PREDICTED: paired amphipathic helix protein Sin3-like 1-like [Fragaria vesca subsp. vesca]          | Null                 | 3.99E-37  |
|         | gi 470148599         | PREDICTED: uncharacterized protein LOC101295192 [Fragaria vesca subsp. vesca]                       | Null                 | 0         |
|         | gi 470149050         | PREDICTED: geraniol 8-hydroxylase-like [Fragaria vesca subsp. vesca]                                | Null                 | 2.69E-57  |
| miR3522 | no target in F.vesca |                                                                                                     |                      |           |
| miR3633 | gi 470105114         | PREDICTED: DNA ligase 1-like [Fragaria vesca subsp. vesca]                                          | response to stimulus | 2.05E-47  |
|         | gi 470109667         | PREDICTED: UDP-glucuronate:xylan alpha-glucuronosyltransferase 2-like [Fragaria vesca subsp. vesca] | cell                 | 0         |
| miR3708 | gi 470111765         | PREDICTED: uncharacterized protein LOC101308638 [Fragaria vesca subsp. vesca]                       | Null                 | 0         |
| miR4380 | no target in F.vesca |                                                                                                     |                      |           |
| miR4398 | gi 470117825         | PREDICTED: uncharacterized protein LOC101297816 [Fragaria vesca subsp. vesca]                       | binding              | 0         |
|         | gi 470131108         | PREDICTED: putative ribonuclease H protein At1g65750-like [Fragaria vesca subsp. vesca]             | Null                 | 2.23E-65  |
| miR4414 | gi 470134006         | PREDICTED: uncharacterized protein LOC101301403 [Fragaria vesca subsp. vesca]                       | Null                 | 1.58E-39  |
| miR5213 | gi 462421411         | hypothetical protein PRUPE_ppa022336mg [Prunus persica]                                             | binding              | 8.46E-60  |
|         | gi 470104981         | PREDICTED: TMV resistance protein N-like [Fragaria vesca subsp. vesca]                              | response to stimulus | 0         |
|         | gi 470105935         | PREDICTED: TMV resistance protein N-like [Fragaria vesca subsp. vesca]                              | Null                 | 0         |
|         | gi 470105945         | PREDICTED: protein SUPPRESSOR OF npr1-1, CONSTITUTIVE 1-like [Fragaria vesca subsp. vesca]          | Null                 | 1.29E-51  |
|         | gi 470116781         | PREDICTED: uncharacterized protein LOC101310969 [Fragaria vesca subsp. vesca]                       | Null                 | 5.54E-88  |
|         | gi 470117728         | PREDICTED: TMV resistance protein N-like [Fragaria vesca subsp. vesca]                              | Null                 | 1.92E-76  |
|         | gi 470118016         | PREDICTED: uncharacterized protein LOC101302247 [Fragaria vesca subsp. vesca]                       | catalytic activity   | 0         |
|         | gi 470119624         | PREDICTED: TMV resistance protein N-like [Fragaria vesca subsp. vesca]                              | Null                 | 0         |
|         | gi 470119639         | PREDICTED: disease resistance protein At4g27190-like [Fragaria vesca subsp. vesca]                  | Null                 | 8.93E-58  |

|         |              |                                                                                              |                      |           |
|---------|--------------|----------------------------------------------------------------------------------------------|----------------------|-----------|
|         | gi 470119641 | PREDICTED: TMV resistance protein N-like [Fragaria vesca subsp. vesca]                       | Null                 | 6.86E-103 |
|         | gi 470119655 | PREDICTED: protein SUPPRESSOR OF npr1-1, CONSTITUTIVE 1-like [Fragaria vesca subsp. vesca]   | Null                 | 4.68E-85  |
|         | gi 470120199 | PREDICTED: TMV resistance protein N-like [Fragaria vesca subsp. vesca]                       | binding              | 7.27E-87  |
|         | gi 470120447 | PREDICTED: disease resistance protein RPS2-like [Fragaria vesca subsp. vesca]                | Null                 | 2.35E-122 |
|         | gi 470120449 | PREDICTED: formin-like protein 20-like [Fragaria vesca subsp. vesca]                         | binding              | 0         |
|         | gi 470120526 | PREDICTED: TMV resistance protein N-like [Fragaria vesca subsp. vesca]                       | Null                 | 1.17E-87  |
|         | gi 470125210 | PREDICTED: TMV resistance protein N-like [Fragaria vesca subsp. vesca]                       | catalytic activity   | 0         |
|         | gi 470130300 | PREDICTED: TMV resistance protein N-like [Fragaria vesca subsp. vesca]                       | Null                 | 3.96E-75  |
|         | gi 470131156 | PREDICTED: TMV resistance protein N-like [Fragaria vesca subsp. vesca]                       | Null                 | 0         |
|         | gi 470131186 | PREDICTED: TMV resistance protein N-like [Fragaria vesca subsp. vesca]                       | binding              | 3.06E-93  |
|         | gi 470131383 | PREDICTED: disease resistance protein At4g27190-like [Fragaria vesca subsp. vesca]           | Null                 | 0         |
|         | gi 470138421 | PREDICTED: TMV resistance protein N-like [Fragaria vesca subsp. vesca]                       | response to stimulus | 1.02E-28  |
|         | gi 470138529 | PREDICTED: TMV resistance protein N-like [Fragaria vesca subsp. vesca]                       | Null                 | 1.87E-108 |
|         | gi 470144488 | PREDICTED: TMV resistance protein N-like [Fragaria vesca subsp. vesca]                       | Null                 | 0         |
|         | gi 470145292 | PREDICTED: uncharacterized protein LOC101307637 [Fragaria vesca subsp. vesca]                | Null                 | 0         |
|         | gi 470145730 | PREDICTED: uncharacterized protein LOC101311138 [Fragaria vesca subsp. vesca]                | Null                 | 0         |
|         | gi 470145781 | PREDICTED: TMV resistance protein N-like [Fragaria vesca subsp. vesca]                       | membrane part        | 6.07E-63  |
|         | gi 470146189 | PREDICTED: TMV resistance protein N-like [Fragaria vesca subsp. vesca]                       | Null                 | 4.40E-90  |
|         | gi 470146761 | PREDICTED: TMV resistance protein N-like [Fragaria vesca subsp. vesca]                       | Null                 | 0         |
|         | gi 470146936 | PREDICTED: uncharacterized protein LOC101294615 [Fragaria vesca subsp. vesca]                | cellular process     | 4.06E-116 |
|         | gi 470147294 | PREDICTED: protein SUPPRESSOR OF npr1-1, CONSTITUTIVE 1-like [Fragaria vesca subsp. vesca]   | Null                 | 0         |
|         | gi 470147298 | PREDICTED: TMV resistance protein N-like [Fragaria vesca subsp. vesca]                       | Null                 | 1.14E-175 |
| miR5258 | gi 470109018 | PREDICTED: uncharacterized protein LOC101309412 [Fragaria vesca subsp. vesca]                | organelle part       | 0         |
|         | gi 470129065 | PREDICTED: probable glutamyl endopeptidase, chloroplastic-like [Fragaria vesca subsp. vesca] | catalytic activity   | 0         |
| miR5260 | gi 21672041  | Putative retroelement [Oryza sativa Japonica Group]                                          | Null                 | 1.81E-24  |
|         | gi 62701853  | retrotransposon protein, putative, unclassified [Oryza sativa Japonica Group]                | Null                 | 9.91E-31  |

|         |              |                                                                                                         |                      |           |
|---------|--------------|---------------------------------------------------------------------------------------------------------|----------------------|-----------|
| miR5289 | gi 147804870 | hypothetical protein VITISV_005133 [Vitis vinifera]                                                     | Null                 | 8.61E-09  |
|         | gi 147820415 | hypothetical protein VITISV_008274 [Vitis vinifera]                                                     | Null                 | 3.90E-16  |
|         | gi 156763844 | putative reductase [Nicotiana tabacum]                                                                  | cellular process     | 2.27E-90  |
|         | gi 225437408 | PREDICTED: uncharacterized protein LOC100246950 [Vitis vinifera]                                        | Null                 | 5.24E-19  |
|         | gi 225443998 | PREDICTED: ABC transporter C family member 2-like [Vitis vinifera]                                      | catalytic activity   | 0         |
|         | gi 255578422 | monooxygenase, putative [Ricinus communis]                                                              | catalytic activity   | 2.16E-35  |
|         | gi 357479451 | hypothetical protein MTR_4g126940 [Medicago truncatula]                                                 | Null                 | 2.19E-07  |
|         | gi 388497358 | unknown [Lotus japonicus]                                                                               | cell                 | 6.36E-140 |
|         | gi 403330330 | B-class lysophosphatidate acyltransferase [Ricinus communis]                                            | Null                 | 1.38E-48  |
|         | gi 408384444 | sucrose transporter 1 [Fragaria x ananassa]                                                             | Null                 | 8.06E-06  |
|         | gi 462402785 | hypothetical protein PRUPE_ppa001632mg [Prunus persica]                                                 | cell                 | 2.41E-159 |
|         | gi 462424288 | hypothetical protein PRUPE_ppa001149mg [Prunus persica]                                                 | metabolic process    | 2.49E-90  |
|         | gi 470102552 | PREDICTED: glutamate receptor 3.3-like [Fragaria vesca subsp. vesca]                                    | transporter activity | 0         |
|         | gi 470103475 | PREDICTED: LMBR1 domain-containing protein 2 homolog A-like [Fragaria vesca subsp. vesca]               | membrane part        | 0         |
|         | gi 470104046 | PREDICTED: uncharacterized protein LOC101295564 [Fragaria vesca subsp. vesca]                           | Null                 | 7.17E-92  |
|         | gi 470104123 | PREDICTED: major facilitator superfamily domain-containing protein 5-like [Fragaria vesca subsp. vesca] | Null                 | 3.91E-10  |
|         | gi 470104232 | PREDICTED: mechanosensitive ion channel protein 2, chloroplastic-like [Fragaria vesca subsp. vesca]     | cell                 | 0         |
|         | gi 470104313 | PREDICTED: agamous-like MADS-box protein AGL21-like [Fragaria vesca subsp. vesca]                       | metabolic process    | 1.29E-77  |
|         | gi 470104580 | PREDICTED: CST complex subunit CTC1-like [Fragaria vesca subsp. vesca]                                  | organelle part       | 0         |
|         | gi 470105207 | PREDICTED: auxin-binding protein ABP19a-like [Fragaria vesca subsp. vesca]                              | Null                 | 4.62E-101 |
|         | gi 470105348 | PREDICTED: probable acyl-activating enzyme 1, peroxisomal-like [Fragaria vesca subsp. vesca]            | catalytic activity   | 7.38E-28  |
|         | gi 470106375 | PREDICTED: long chain acyl-CoA synthetase 1-like [Fragaria vesca subsp. vesca]                          | cell                 | 0         |
|         | gi 470107392 | PREDICTED: 26S proteasome regulatory subunit 4 homolog A-like [Fragaria vesca subsp. vesca]             | binding              | 0         |
|         | gi 470107767 | PREDICTED: uncharacterized protein LOC101295670 [Fragaria vesca subsp. vesca]                           | Null                 | 5.50E-64  |
|         | gi 470107938 | PREDICTED: fatty acid amide hydrolase-like [Fragaria vesca subsp. vesca]                                | cell                 | 7.06E-134 |
|         | gi 470108286 | PREDICTED: putative laccase-9-like [Fragaria vesca subsp. vesca]                                        | catalytic activity   | 0         |

|              |                                                                                                                    |                         |           |
|--------------|--------------------------------------------------------------------------------------------------------------------|-------------------------|-----------|
| gi 470108351 | PREDICTED: uncharacterized protein LOC101309208 [Fragaria vesca subsp. vesca]                                      | Null                    | 3.62E-68  |
| gi 470110283 | PREDICTED: uncharacterized protein LOC101298087 [Fragaria vesca subsp. vesca]                                      | reproductive process    | 0         |
| gi 470110450 | PREDICTED: transcriptional corepressor LEUNIG-like [Fragaria vesca subsp. vesca]                                   | biological regulation   | 0         |
| gi 470110548 | PREDICTED: pleiotropic drug resistance protein 2-like [Fragaria vesca subsp. vesca]                                | membrane                | 0         |
| gi 470110562 | PREDICTED: tRNA dimethylallyltransferase 2-like [Fragaria vesca subsp. vesca]                                      | binding                 | 5.19E-160 |
| gi 470111010 | PREDICTED: chromodomain-helicase-DNA-binding protein 2-like [Fragaria vesca subsp. vesca]                          | binding                 | 0         |
| gi 470111415 | PREDICTED: LOW QUALITY PROTEIN: CHD3-type chromatin-remodeling factor PICKLE-like [Fragaria vesca subsp. vesca]    | Null                    | 7.16E-09  |
| gi 470111572 | PREDICTED: E3 SUMO-protein ligase MMS21-like [Fragaria vesca subsp. vesca]                                         | binding                 | 5.91E-58  |
| gi 470111832 | PREDICTED: agamous-like MADS-box protein AGL62-like [Fragaria vesca subsp. vesca]                                  | Null                    | 5.13E-14  |
| gi 470112000 | PREDICTED: phospholipid--sterol O-acyltransferase-like [Fragaria vesca subsp. vesca]                               | single-organism process | 0         |
| gi 470112161 | PREDICTED: niemann-Pick C1 protein-like [Fragaria vesca subsp. vesca]                                              | receptor activity       | 0         |
| gi 470112557 | PREDICTED: uncharacterized protein LOC101304542 [Fragaria vesca subsp. vesca]                                      | Null                    | 3.01E-10  |
| gi 470112626 | PREDICTED: SKP1-interacting partner 15-like [Fragaria vesca subsp. vesca]                                          | binding                 | 3.39E-32  |
| gi 470113467 | PREDICTED: uncharacterized protein LOC101308350 [Fragaria vesca subsp. vesca]                                      | Null                    | 0         |
| gi 470113876 | PREDICTED: uncharacterized protein LOC101310963 [Fragaria vesca subsp. vesca]                                      | Null                    | 6.43E-117 |
| gi 470114978 | PREDICTED: serine/threonine-protein kinase CBK1-like [Fragaria vesca subsp. vesca]                                 | binding                 | 6.83E-177 |
| gi 470115141 | PREDICTED: mediator of RNA polymerase II transcription subunit 15a-like [Fragaria vesca subsp. vesca]              | cellular process        | 1.60E-98  |
| gi 470115548 | PREDICTED: probable LRR receptor-like serine/threonine-protein kinase At2g24230-like [Fragaria vesca subsp. vesca] | catalytic activity      | 3.11E-21  |
| gi 470115822 | PREDICTED: cyclin-T1-3-like [Fragaria vesca subsp. vesca]                                                          | Null                    | 0         |
| gi 470116593 | PREDICTED: zinc finger CCCH domain-containing protein 18-like [Fragaria vesca subsp. vesca]                        | catalytic activity      | 1.52E-57  |
| gi 470117274 | PREDICTED: rab3 GTPase-activating protein catalytic subunit-like [Fragaria vesca subsp. vesca]                     | cell                    | 0         |
| gi 470117847 | PREDICTED: probable prefoldin subunit 3-like isoform 1 [Fragaria vesca subsp. vesca]                               | cell                    | 7.25E-95  |
| gi 470118066 | PREDICTED: omega-6 fatty acid desaturase, endoplasmic reticulum isozyme 2-like [Fragaria vesca subsp. vesca]       | catalytic activity      | 0         |

|              |                                                                                                                                                                                                                   |                       |           |
|--------------|-------------------------------------------------------------------------------------------------------------------------------------------------------------------------------------------------------------------|-----------------------|-----------|
| gi 470118839 | PREDICTED: peroxidase 7-like [Fragaria vesca subsp. vesca]                                                                                                                                                        | antioxidant activity  | 0         |
| gi 470119045 | PREDICTED: CASP-like protein POPTRDRAFT_810994-like [Fragaria vesca subsp. vesca]                                                                                                                                 | Null                  | 1.05E-42  |
| gi 470119329 | PREDICTED: alternative NAD(P)H dehydrogenase 2, mitochondrial-like [Fragaria vesca subsp. vesca]<br>PREDICTED: 1,4-alpha-glucan-branching enzyme 3, chloroplastic/amyloplastic-like [Fragaria vesca subsp. vesca] | catalytic activity    | 0         |
| gi 470119480 | vesca]                                                                                                                                                                                                            | cell                  | 0         |
| gi 470120335 | PREDICTED: uncharacterized protein LOC101294161 [Fragaria vesca subsp. vesca]                                                                                                                                     | Null                  | 6.67E-15  |
| gi 470120371 | PREDICTED: uncharacterized protein LOC101301378 [Fragaria vesca subsp. vesca]<br>PREDICTED: pentatricopeptide repeat-containing protein At1g63130, mitochondrial-like [Fragaria vesca subsp. vesca]               | Null                  | 1.08E-95  |
| gi 470120412 | vesca]                                                                                                                                                                                                            | Null                  | 1.71E-38  |
| gi 470120476 | PREDICTED: cellulose synthase-like protein E1-like [Fragaria vesca subsp. vesca]                                                                                                                                  | membrane              | 0         |
| gi 470120882 | PREDICTED: uncharacterized protein LOC101302153 [Fragaria vesca subsp. vesca]                                                                                                                                     | cell                  | 0         |
| gi 470121136 | PREDICTED: uncharacterized protein LOC101292007 [Fragaria vesca subsp. vesca]                                                                                                                                     | Null                  | 0         |
| gi 470121443 | PREDICTED: squamosa promoter-binding-like protein 7-like [Fragaria vesca subsp. vesca]                                                                                                                            | biological regulation | 0         |
| gi 470121947 | PREDICTED: pentatricopeptide repeat-containing protein At5g18950-like [Fragaria vesca subsp. vesca]                                                                                                               | Null                  | 3.28E-07  |
| gi 470122093 | PREDICTED: squamosa promoter-binding-like protein 12-like [Fragaria vesca subsp. vesca]                                                                                                                           | Null                  | 0         |
| gi 470122923 | PREDICTED: protein MEI2-like 4-like [Fragaria vesca subsp. vesca]                                                                                                                                                 | binding               | 0         |
| gi 470122977 | PREDICTED: RNA pseudourine synthase 7-like [Fragaria vesca subsp. vesca]                                                                                                                                          | catalytic activity    | 1.07E-178 |
| gi 470123448 | PREDICTED: uncharacterized protein YpgQ-like [Fragaria vesca subsp. vesca]                                                                                                                                        | catalytic activity    | 6.08E-115 |
| gi 470123487 | PREDICTED: pre-mRNA-processing protein 40C-like [Fragaria vesca subsp. vesca]                                                                                                                                     | binding               | 0         |
| gi 470123941 | PREDICTED: uncharacterized protein LOC101305167 [Fragaria vesca subsp. vesca]                                                                                                                                     | Null                  | 6.36E-145 |
| gi 470124027 | PREDICTED: sulfate transporter 3.1-like [Fragaria vesca subsp. vesca]                                                                                                                                             | transporter activity  | 6.10E-19  |
| gi 470124060 | PREDICTED: uncharacterized protein LOC101304182 [Fragaria vesca subsp. vesca]                                                                                                                                     | Null                  | 0         |
| gi 470124141 | PREDICTED: uncharacterized protein LOC101298599 [Fragaria vesca subsp. vesca]                                                                                                                                     | Null                  | 1.21E-23  |
| gi 470124193 | PREDICTED: CASP-like protein 6-like [Fragaria vesca subsp. vesca]                                                                                                                                                 | Null                  | 2.20E-10  |
| gi 470124363 | PREDICTED: putative ribonuclease H protein At1g65750-like [Fragaria vesca subsp. vesca]                                                                                                                           | Null                  | 2.50E-35  |
| gi 470124647 | PREDICTED: importin-9-like [Fragaria vesca subsp. vesca]                                                                                                                                                          | localization          | 0         |

|              |                                                                                                |                      |           |
|--------------|------------------------------------------------------------------------------------------------|----------------------|-----------|
| gi 470125065 | PREDICTED: F-box/kelch-repeat protein At3g06240-like [Fragaria vesca subsp. vesca]             | Null                 | 0         |
| gi 470125132 | PREDICTED: uncharacterized protein LOC101298513 [Fragaria vesca subsp. vesca]                  | Null                 | 0         |
| gi 470125487 | PREDICTED: SPX domain-containing membrane protein At4g22990-like [Fragaria vesca subsp. vesca] | localization         | 0         |
| gi 470125561 | PREDICTED: uncharacterized protein LOC101297726 [Fragaria vesca subsp. vesca]                  | Null                 | 6.48E-07  |
| gi 470127533 | PREDICTED: universal stress protein A-like protein-like [Fragaria vesca subsp. vesca]          | response to stimulus | 4.65E-73  |
| gi 470127670 | PREDICTED: ABC transporter I family member 17-like [Fragaria vesca subsp. vesca]               | binding              | 4.37E-130 |
| gi 470127956 | PREDICTED: L-ascorbate oxidase-like [Fragaria vesca subsp. vesca]                              | catalytic activity   | 1.75E-76  |
| gi 470127997 | PREDICTED: phosphatidylinositol 4-phosphate 5-kinase 8-like [Fragaria vesca subsp. vesca]      | binding              | 0         |
| gi 470128218 | PREDICTED: tuftelin-interacting protein 11-like [Fragaria vesca subsp. vesca]                  | Null                 | 3.90E-20  |
| gi 470128576 | PREDICTED: uncharacterized protein LOC101299868 [Fragaria vesca subsp. vesca]                  | catalytic activity   | 9.37E-145 |
| gi 470128592 | PREDICTED: uncharacterized protein LOC101302362 [Fragaria vesca subsp. vesca]                  | membrane part        | 2.40E-112 |
| gi 470128687 | PREDICTED: uncharacterized protein LOC101292215 [Fragaria vesca subsp. vesca]                  | Null                 | 4.96E-40  |
| gi 470129551 | PREDICTED: serine/threonine-protein kinase PBS1-like [Fragaria vesca subsp. vesca]             | binding              | 3.37E-130 |
| gi 470130900 | PREDICTED: uncharacterized protein LOC101299872 [Fragaria vesca subsp. vesca]                  | Null                 | 4.42E-39  |
| gi 470131227 | PREDICTED: ATP-dependent DNA helicase Q-like 4A-like [Fragaria vesca subsp. vesca]             | response to stimulus | 0         |
| gi 470131247 | PREDICTED: anaphase-promoting complex subunit 2-like [Fragaria vesca subsp. vesca]             | cell                 | 0         |
| gi 470131291 | PREDICTED: purple acid phosphatase 23-like [Fragaria vesca subsp. vesca]                       | catalytic activity   | 0         |
| gi 470131344 | PREDICTED: uncharacterized protein LOC101305082 [Fragaria vesca subsp. vesca]                  | Null                 | 0         |
|              |                                                                                                | macromolecular       |           |
| gi 470131673 | PREDICTED: ATP synthase subunit delta', mitochondrial-like [Fragaria vesca subsp. vesca]       | complex              | 9.77E-95  |
| gi 470131796 | PREDICTED: putative F-box protein At1g67390-like [Fragaria vesca subsp. vesca]                 | Null                 | 0         |
| gi 470132062 | PREDICTED: uncharacterized protein LOC101293797 [Fragaria vesca subsp. vesca]                  | Null                 | 1.49E-47  |
| gi 470132102 | PREDICTED: uncharacterized protein LOC101300455 [Fragaria vesca subsp. vesca]                  | Null                 | 0         |
| gi 470132228 | PREDICTED: decapping 5-like protein-like [Fragaria vesca subsp. vesca]                         | Null                 | 0         |
| gi 470132258 | PREDICTED: WD repeat-containing protein 48 homolog [Fragaria vesca subsp. vesca]               | catalytic activity   | 0         |
| gi 470134516 | PREDICTED: GTP-binding protein TypA/BipA homolog [Fragaria vesca subsp. vesca]                 | catalytic activity   | 2.46E-115 |

|              |                                                                                                      |                    |           |
|--------------|------------------------------------------------------------------------------------------------------|--------------------|-----------|
| gi 470134556 | PREDICTED: transcription activator GLK1-like [Fragaria vesca subsp. vesca]                           | Null               | 0         |
| gi 470134558 | PREDICTED: serine carboxypeptidase-like 40-like [Fragaria vesca subsp. vesca]                        | catalytic activity | 0         |
| gi 470135119 | PREDICTED: protein RRP5 homolog [Fragaria vesca subsp. vesca]                                        | organelle part     | 0         |
| gi 470135695 | PREDICTED: uncharacterized protein At2g41620-like [Fragaria vesca subsp. vesca]                      | organelle part     | 0         |
| gi 470136327 | PREDICTED: probable S-acyltransferase At4g15080-like [Fragaria vesca subsp. vesca]                   | membrane           | 0         |
|              |                                                                                                      | multi-organism     |           |
| gi 470136500 | PREDICTED: cyclin-G-associated kinase-like [Fragaria vesca subsp. vesca]                             | process            | 9.14E-167 |
|              | PREDICTED: LOW QUALITY PROTEIN: ABC transporter A family member 1-like [Fragaria vesca subsp. vesca] |                    |           |
| gi 470137167 |                                                                                                      | binding            | 0         |
| gi 470137560 | PREDICTED: transcription factor TCP20-like [Fragaria vesca subsp. vesca]                             | Null               | 3.34E-117 |
| gi 470137699 | PREDICTED: uncharacterized protein LOC101313912 [Fragaria vesca subsp. vesca]                        | cellular process   | 0         |
|              |                                                                                                      | cellular component |           |
|              |                                                                                                      | organization or    |           |
| gi 470138030 | PREDICTED: PHD finger protein MALE MEIOCYTE DEATH 1-like [Fragaria vesca subsp. vesca]               | biogenesis         | 0         |
| gi 470139380 | PREDICTED: double-stranded RNA-binding protein 1-like [Fragaria vesca subsp. vesca]                  | Null               | 1.61E-06  |
| gi 470139591 | PREDICTED: E3 ubiquitin-protein ligase SINAT2-like [Fragaria vesca subsp. vesca]                     | catalytic activity | 4.95E-143 |
| gi 470139593 | PREDICTED: probable protein kinase At2g41970-like [Fragaria vesca subsp. vesca]                      | binding            | 0         |
| gi 470139694 | PREDICTED: uncharacterized protein LOC101301607 [Fragaria vesca subsp. vesca]                        | Null               | 0         |
| gi 470140857 | PREDICTED: uncharacterized protein LOC101301323 [Fragaria vesca subsp. vesca]                        | binding            | 1.48E-18  |
| gi 470140965 | PREDICTED: cytoplasmic tRNA 2-thiolation protein 2-like [Fragaria vesca subsp. vesca]                | Null               | 0         |
| gi 470141148 | PREDICTED: F-box/kelch-repeat protein At3g23880-like [Fragaria vesca subsp. vesca]                   | Null               | 5.43E-15  |
| gi 470141550 | PREDICTED: callose synthase 2-like [Fragaria vesca subsp. vesca]                                     | membrane           | 0         |
| gi 470141620 | PREDICTED: thylakoid luminal 19 kDa protein, chloroplastic-like [Fragaria vesca subsp. vesca]        | cell               | 3.13E-71  |
| gi 470141927 | PREDICTED: histone-lysine N-methyltransferase ATX3-like [Fragaria vesca subsp. vesca]                | catalytic activity | 0         |
|              |                                                                                                      | multicellular      |           |
| gi 470143095 | PREDICTED: cytochrome b5 reductase 4-like [Fragaria vesca subsp. vesca]                              | organismal process | 3.91E-97  |

|         |                      |                                                                                                                  |                    |           |
|---------|----------------------|------------------------------------------------------------------------------------------------------------------|--------------------|-----------|
|         | gi 470143162         | PREDICTED: rac-like GTP-binding protein 7-like [Fragaria vesca subsp. vesca]                                     | cell               | 1.97E-58  |
|         | gi 470143700         | PREDICTED: protein kinase APK1B, chloroplastic-like [Fragaria vesca subsp. vesca]                                | Null               | 2.48E-18  |
|         | gi 470145221         | PREDICTED: G-type lectin S-receptor-like serine/threonine-protein kinase B120-like [Fragaria vesca subsp. vesca] | catalytic activity | 1.42E-37  |
|         | gi 470146022         | PREDICTED: uncharacterized protein LOC101315004 [Fragaria vesca subsp. vesca]                                    | Null               | 1.25E-59  |
|         | gi 470146181         | PREDICTED: putative ribonuclease H protein At1g65750-like [Fragaria vesca subsp. vesca]                          | Null               | 9.58E-11  |
|         | gi 470147163         | PREDICTED: LOW QUALITY PROTEIN: ferric reduction oxidase 4-like, partial [Fragaria vesca subsp. vesca]           | binding            | 1.59E-18  |
|         | gi 470147363         | PREDICTED: NAC transcription factor ONAC010-like [Fragaria vesca subsp. vesca]                                   | Null               | 1.21E-100 |
|         | gi 470147736         | PREDICTED: LOW QUALITY PROTEIN: probable aspartyl aminopeptidase-like [Fragaria vesca subsp. vesca]              | cell               | 1.48E-62  |
|         | gi 470148182         | PREDICTED: helicase protein MOM1-like [Fragaria vesca subsp. vesca]                                              | binding            | 0         |
|         | gi 470148343         | PREDICTED: LOW QUALITY PROTEIN: CBS domain-containing protein CBSCBSPB3-like [Fragaria vesca subsp. vesca]       | Null               | 0         |
|         | gi 470148479         | PREDICTED: enzymatic polyprotein-like [Fragaria vesca subsp. vesca]                                              | Null               | 7.47E-43  |
|         | gi 470148519         | PREDICTED: F-box protein SKIP16-like [Fragaria vesca subsp. vesca]                                               | binding            | 0         |
|         | gi 470148781         | PREDICTED: uncharacterized protein LOC101304245 [Fragaria vesca subsp. vesca]                                    | Null               | 0         |
|         | gi 62319939          | hypothetical protein [Arabidopsis thaliana]                                                                      | Null               | 3.68E-12  |
| miR5290 | gi 470112365         | PREDICTED: leucine-rich repeat and death domain-containing protein 1-like [Fragaria vesca subsp. vesca]          | Null               | 0         |
|         | gi 470113133         | PREDICTED: 1-aminocyclopropane-1-carboxylate synthase CMA101-like [Fragaria vesca subsp. vesca]                  | cellular process   | 0         |
|         | gi 470129094         | PREDICTED: probable beta-D-xylosidase 2-like [Fragaria vesca subsp. vesca]                                       | cell               | 0         |
|         | gi 470132879         | PREDICTED: GDSL esterase/lipase At1g09390-like [Fragaria vesca subsp. vesca]                                     | organelle part     | 2.55E-176 |
| miR5642 | no target in F.vesca |                                                                                                                  | multicellular      |           |
| miR5643 | gi 470148152         | PREDICTED: uncharacterized protein LOC101311721 [Fragaria vesca subsp. vesca]                                    | organismal process | 1.83E-112 |
| miR5656 | no target in F.vesca |                                                                                                                  |                    |           |
| miR5663 | no target in F.vesca |                                                                                                                  |                    |           |
| miR5813 | no target in F.vesca |                                                                                                                  |                    |           |



|         |                      |                                                                                                            |                    |           |
|---------|----------------------|------------------------------------------------------------------------------------------------------------|--------------------|-----------|
| miR6103 | gi 470147075         | PREDICTED: probable phosphatidylinositol 4-kinase type 2-beta At1g26270-like [Fragaria vesca subsp. vesca] | catalytic activity | 4.42E-78  |
| miR6437 | no target in F.vesca |                                                                                                            |                    |           |
| miR7708 | no target in F.vesca |                                                                                                            |                    |           |
| miR7732 | no target in F.vesca |                                                                                                            |                    |           |
| miR7767 | gi 470112213         | PREDICTED: linoleate 9S-lipoxygenase 6-like [Fragaria vesca subsp. vesca]                                  | catalytic activity | 0         |
|         | gi 470125218         | PREDICTED: uncharacterized protein LOC101312724 [Fragaria vesca subsp. vesca]                              | Null               | 0         |
|         | gi 470136547         | PREDICTED: protein unc-50 homolog [Fragaria vesca subsp. vesca]                                            | Null               | 2.74E-13  |
|         | gi 470141108         | PREDICTED: serine carboxypeptidase II-3-like [Fragaria vesca subsp. vesca]                                 | Null               | 0         |
| miR7782 | no target in F.vesca |                                                                                                            |                    |           |
| miR7984 | gi 470118845         | PREDICTED: pre-mRNA-splicing factor ATP-dependent RNA helicase PRP16-like [Fragaria vesca subsp. vesca]    | binding            | 0         |
|         | gi 470148846         | PREDICTED: uncharacterized protein LOC101292659 [Fragaria vesca subsp. vesca]                              | Null               | 5.19E-162 |
| miR8122 | gi 470110995         | PREDICTED: uncharacterized protein LOC101306203 [Fragaria vesca subsp. vesca]                              | binding            | 0         |
|         | gi 470113449         | PREDICTED: subtilisin-like protease-like [Fragaria vesca subsp. vesca]                                     | catalytic activity | 0         |
|         | gi 470114425         | PREDICTED: nuclear inhibitor of protein phosphatase 1-like [Fragaria vesca subsp. vesca]                   | Null               | 0         |
| miR8175 | gi 255561482         | Squalene monooxygenase, putative [Ricinus communis]                                                        | binding            | 5.67E-129 |
|         | gi 470105547         | PREDICTED: ATP-dependent DNA helicase DDM1-like [Fragaria vesca subsp. vesca]                              | catalytic activity | 0         |
|         | gi 470126560         | PREDICTED: putative phospholipid-transporting ATPase 9-like [Fragaria vesca subsp. vesca]                  | binding            | 0         |
|         | gi 470129464         | PREDICTED: geraniol 8-hydroxylase-like [Fragaria vesca subsp. vesca]                                       | catalytic activity | 0         |
|         | gi 470132307         | PREDICTED: uncharacterized protein LOC101296394 [Fragaria vesca subsp. vesca]                              | Null               | 3.27E-171 |
|         | gi 470136597         | PREDICTED: serine/threonine-protein kinase WNK8-like [Fragaria vesca subsp. vesca]                         | catalytic activity | 0         |
|         | gi 470143625         | PREDICTED: uncharacterized protein LOC101299814 [Fragaria vesca subsp. vesca]                              | Null               | 0         |
|         | gi 470146462         | PREDICTED: uncharacterized protein LOC101314710 [Fragaria vesca subsp. vesca]                              | catalytic activity | 0         |
|         | gi 470147629         | PREDICTED: aquaporin NIP1-2-like [Fragaria vesca subsp. vesca]                                             | membrane part      | 7.49E-153 |
|         | gi 470149290         | PREDICTED: uncharacterized protein LOC101314053 [Fragaria vesca subsp. vesca]                              | Null               | 0         |
| miR8183 | gi 470127869         | PREDICTED: threonylcarbamoyladenosine tRNA methyltransferase-like [Fragaria vesca subsp. vesca]            | cellular process   | 0         |
| miR8581 | no target in F.vesca |                                                                                                            |                    |           |

|              |                                                                                        |                                                                                                                                                |                       |           |
|--------------|----------------------------------------------------------------------------------------|------------------------------------------------------------------------------------------------------------------------------------------------|-----------------------|-----------|
| miR8666      | no target in <i>F.vesca</i>                                                            |                                                                                                                                                |                       |           |
| miR8781      | no target in <i>F.vesca</i>                                                            |                                                                                                                                                |                       |           |
| miR9472      | gi 241993361                                                                           | putative gag-pol polyprotein [ <i>Fragaria x ananassa</i> ]                                                                                    | binding               | 8.33E-70  |
|              | gi 462407656                                                                           | hypothetical protein PRUPE_ppa006343mg [ <i>Prunus persica</i> ]                                                                               | Null                  | 3.17E-06  |
|              | gi 470102876                                                                           | PREDICTED: GTPase Era-like [ <i>Fragaria vesca</i> subsp. <i>vesca</i> ]                                                                       | membrane              | 0         |
|              | gi 470105505                                                                           | PREDICTED: putative pentatricopeptide repeat-containing protein At3g47840-like [ <i>Fragaria vesca</i> subsp. <i>vesca</i> ]                   | binding               | 9.36E-33  |
|              | gi 470116581                                                                           | PREDICTED: protein TORNADO 1-like [ <i>Fragaria vesca</i> subsp. <i>vesca</i> ]                                                                | cell                  | 1.93E-106 |
|              | gi 470130008                                                                           | PREDICTED: trichome differentiation protein GL1-like [ <i>Fragaria vesca</i> subsp. <i>vesca</i> ]                                             | cell                  | 8.37E-132 |
| miR9653      | gi 462409529                                                                           | hypothetical protein PRUPE_ppa001072mg [ <i>Prunus persica</i> ]                                                                               | Null                  | 0         |
|              |                                                                                        | PREDICTED: bifunctional 3-dehydroquinate dehydratase/shikimate dehydrogenase, chloroplastic-like [ <i>Fragaria vesca</i> subsp. <i>vesca</i> ] |                       |           |
|              | gi 470105765                                                                           | <i>vesca</i> subsp. <i>vesca</i> ]                                                                                                             | catalytic activity    | 0         |
|              | gi 470110844                                                                           | PREDICTED: uncharacterized protein LOC101308047 [ <i>Fragaria vesca</i> subsp. <i>vesca</i> ]                                                  | binding               | 2.47E-128 |
|              | gi 470113023                                                                           | PREDICTED: histone-lysine N-methyltransferase ASHH2-like [ <i>Fragaria vesca</i> subsp. <i>vesca</i> ]                                         | biological regulation | 0         |
|              | gi 470131876                                                                           | PREDICTED: protein NLP7-like [ <i>Fragaria vesca</i> subsp. <i>vesca</i> ]                                                                     | cell                  | 0         |
|              |                                                                                        |                                                                                                                                                | multicellular         |           |
|              | gi 470147169                                                                           | PREDICTED: protein TRANSPARENT TESTA 12-like [ <i>Fragaria vesca</i> subsp. <i>vesca</i> ]                                                     | organismal process    | 0         |
| gi 470147298 | PREDICTED: TMV resistance protein N-like [ <i>Fragaria vesca</i> subsp. <i>vesca</i> ] | Null                                                                                                                                           | 1.14E-175             |           |
| miR9767      | gi 422293454                                                                           | transcript antisense to ribosomal rna protein [ <i>Nannochloropsis gaditana</i> CCMP526]                                                       | Null                  | 1.02E-26  |

---

**Table S5: Targets of identified novel miRNAs in infected strawberry fruits**

| Name          | Target gene No.                                                                             | Target gene description                                                                                 | Possible function  | E value            |  |
|---------------|---------------------------------------------------------------------------------------------|---------------------------------------------------------------------------------------------------------|--------------------|--------------------|--|
| fan-novel-001 | gi 147860024                                                                                | hypothetical protein VITISV_015109 [Vitis vinifera]                                                     | Null               | 0                  |  |
|               | gi 359485158                                                                                | PREDICTED: serine/threonine-protein phosphatase 5-like [Vitis vinifera]                                 | cellular process   | 0                  |  |
|               |                                                                                             |                                                                                                         |                    | cellular component |  |
|               |                                                                                             |                                                                                                         |                    | organization or    |  |
|               | gi 470121825                                                                                | PREDICTED: LOW QUALITY PROTEIN: DNA repair protein RAD50-like [Fragaria vesca subsp. vesca]             | biogenesis         | 0                  |  |
|               | gi 470125477                                                                                | PREDICTED: putative copper-transporting ATPase HMA5-like [Fragaria vesca subsp. vesca]                  | binding            | 0                  |  |
| gi 470145158  | PREDICTED: putative disease resistance protein At3g14460-like [Fragaria vesca subsp. vesca] | cell                                                                                                    | 1.93E-43           |                    |  |
| fan-novel-002 | no target in F.vesca                                                                        |                                                                                                         |                    |                    |  |
| fan-novel-003 | gi 470133245                                                                                | PREDICTED: uncharacterized protein LOC101312361 [Fragaria vesca subsp. vesca]                           | Null               | 2.19E-152          |  |
|               | gi 470146238                                                                                | PREDICTED: MLO-like protein 1-like [Fragaria vesca subsp. vesca]                                        | membrane           | 0                  |  |
|               | gi 470147427                                                                                | PREDICTED: capsid protein VP1-like, partial [Fragaria vesca subsp. vesca]                               | Null               | 0                  |  |
| fan-novel-004 | gi 470141497                                                                                | PREDICTED: transcription factor GAMYB-like [Fragaria vesca subsp. vesca]                                | Null               | 0                  |  |
| fan-novel-005 | no target in F.vesca                                                                        |                                                                                                         |                    |                    |  |
| fan-novel-006 | gi 462403251                                                                                | hypothetical protein PRUPE_ppa018907mg, partial [Prunus persica]                                        | Null               | 3.12E-42           |  |
|               | gi 470141705                                                                                | PREDICTED: ATP-dependent zinc metalloprotease FTSH 12, chloroplastic-like [Fragaria vesca subsp. vesca] | cell               | 0                  |  |
| fan-novel-007 | gi 147804870                                                                                | hypothetical protein VITISV_005133 [Vitis vinifera]                                                     | Null               | 8.61E-09           |  |
|               | gi 147820415                                                                                | hypothetical protein VITISV_008274 [Vitis vinifera]                                                     | Null               | 3.90E-16           |  |
|               | gi 156763844                                                                                | putative reductase [Nicotiana tabacum]                                                                  | cellular process   | 2.27E-90           |  |
|               | gi 225437408                                                                                | PREDICTED: uncharacterized protein LOC100246950 [Vitis vinifera]                                        | Null               | 5.24E-19           |  |
|               | gi 225443998                                                                                | PREDICTED: ABC transporter C family member 2-like [Vitis vinifera]                                      | catalytic activity | 0                  |  |
|               | gi 255578422                                                                                | monooxygenase, putative [Ricinus communis]                                                              | catalytic activity | 2.16E-35           |  |
|               | gi 356535141                                                                                | PREDICTED: protein MON2 homolog isoform 2 [Glycine max]                                                 | Null               | 0                  |  |

|              |                                                                                                                    |                      |           |
|--------------|--------------------------------------------------------------------------------------------------------------------|----------------------|-----------|
| gi 357479451 | hypothetical protein MTR_4g126940 [Medicago truncatula]                                                            | Null                 | 2.19E-07  |
| gi 388497358 | unknown [Lotus japonicus]                                                                                          | cell                 | 6.36E-140 |
| gi 403330330 | B-class lysophosphatidate acyltransferase [Ricinus communis]                                                       | Null                 | 1.38E-48  |
| gi 408384444 | sucrose transporter 1 [Fragaria x ananassa]                                                                        | Null                 | 2.54E-08  |
| gi 462399497 | hypothetical protein PRUPE_ppa023647mg [Prunus persica]                                                            | transporter activity | 1.10E-169 |
| gi 462399766 | hypothetical protein PRUPE_ppa002529mg [Prunus persica]                                                            | cell                 | 1.63E-178 |
| gi 462402785 | hypothetical protein PRUPE_ppa001632mg [Prunus persica]                                                            | cell                 | 2.41E-159 |
| gi 462404779 | hypothetical protein PRUPE_ppb020052mg [Prunus persica]                                                            | Null                 | 7.54E-36  |
| gi 462424288 | hypothetical protein PRUPE_ppa001149mg [Prunus persica]                                                            | metabolic process    | 2.49E-90  |
| gi 470102552 | PREDICTED: glutamate receptor 3.3-like [Fragaria vesca subsp. vesca]                                               | transporter activity | 0         |
| gi 470103475 | PREDICTED: LMBR1 domain-containing protein 2 homolog A-like [Fragaria vesca subsp. vesca]                          | membrane part        | 0         |
| gi 470104046 | PREDICTED: uncharacterized protein LOC101295564 [Fragaria vesca subsp. vesca]                                      | Null                 | 7.17E-92  |
| gi 470104123 | PREDICTED: major facilitator superfamily domain-containing protein 5-like [Fragaria vesca subsp. vesca]            | Null                 | 3.91E-10  |
| gi 470104232 | PREDICTED: mechanosensitive ion channel protein 2, chloroplastic-like [Fragaria vesca subsp. vesca]                | cell                 | 0         |
| gi 470104313 | PREDICTED: agamous-like MADS-box protein AGL21-like [Fragaria vesca subsp. vesca]                                  | metabolic process    | 1.29E-77  |
| gi 470104580 | PREDICTED: CST complex subunit CTC1-like [Fragaria vesca subsp. vesca]                                             | organelle part       | 0         |
| gi 470104869 | PREDICTED: receptor-like serine/threonine-protein kinase SD1-8-like [Fragaria vesca subsp. vesca]                  | Null                 | 7.88E-13  |
| gi 470105207 | PREDICTED: auxin-binding protein ABP19a-like [Fragaria vesca subsp. vesca]                                         | Null                 | 4.62E-101 |
| gi 470105348 | PREDICTED: probable acyl-activating enzyme 1, peroxisomal-like [Fragaria vesca subsp. vesca]                       | catalytic activity   | 7.38E-28  |
| gi 470105901 | PREDICTED: probable LRR receptor-like serine/threonine-protein kinase At1g56130-like [Fragaria vesca subsp. vesca] | membrane             | 0         |
| gi 470106216 | PREDICTED: transcription factor WER-like [Fragaria vesca subsp. vesca]                                             | Null                 | 2.57E-145 |
| gi 470106375 | PREDICTED: long chain acyl-CoA synthetase 1-like [Fragaria vesca subsp. vesca]                                     | cell                 | 0         |
| gi 470107178 | PREDICTED: hyoscyamine 6-dioxygenase-like [Fragaria vesca subsp. vesca]                                            | Null                 | 0         |
| gi 470107392 | PREDICTED: 26S proteasome regulatory subunit 4 homolog A-like [Fragaria vesca subsp. vesca]                        | binding              | 0         |
| gi 470107767 | PREDICTED: uncharacterized protein LOC101295670 [Fragaria vesca subsp. vesca]                                      | Null                 | 5.50E-64  |

|              |                                                                                                                                                                                                              |                         |           |
|--------------|--------------------------------------------------------------------------------------------------------------------------------------------------------------------------------------------------------------|-------------------------|-----------|
| gi 470108224 | PREDICTED: uncharacterized membrane protein At4g09580-like [Fragaria vesca subsp. vesca]<br>PREDICTED: probable serine/threonine-protein kinase At1g18390-like isoform 1 [Fragaria vesca subsp. vesca]       | cell                    | 1.35E-138 |
| gi 470108277 |                                                                                                                                                                                                              | binding                 | 0         |
| gi 470108286 | PREDICTED: putative laccase-9-like [Fragaria vesca subsp. vesca]                                                                                                                                             | catalytic activity      | 0         |
| gi 470108351 | PREDICTED: uncharacterized protein LOC101309208 [Fragaria vesca subsp. vesca]<br>PREDICTED: DNA-directed RNA polymerases I, II, and III subunit RPABC2-like [Fragaria vesca subsp. vesca]                    | Null                    | 3.62E-68  |
| gi 470108469 |                                                                                                                                                                                                              | organelle part          | 2.62E-58  |
| gi 470110283 | PREDICTED: uncharacterized protein LOC101298087 [Fragaria vesca subsp. vesca]                                                                                                                                | reproductive process    | 0         |
| gi 470110450 | PREDICTED: transcriptional corepressor LEUNIG-like [Fragaria vesca subsp. vesca]                                                                                                                             | biological regulation   | 0         |
| gi 470110513 | PREDICTED: ubiquitin carboxyl-terminal hydrolase 8-like [Fragaria vesca subsp. vesca]                                                                                                                        | catalytic activity      | 0         |
| gi 470110548 | PREDICTED: pleiotropic drug resistance protein 2-like [Fragaria vesca subsp. vesca]                                                                                                                          | membrane                | 0         |
| gi 470110562 | PREDICTED: tRNA dimethylallyltransferase 2-like [Fragaria vesca subsp. vesca]                                                                                                                                | binding                 | 5.19E-160 |
| gi 470111010 | PREDICTED: chromodomain-helicase-DNA-binding protein 2-like [Fragaria vesca subsp. vesca]<br>PREDICTED: LOW QUALITY PROTEIN: CHD3-type chromatin-remodeling factor PICKLE-like [Fragaria vesca subsp. vesca] | binding                 | 0         |
| gi 470111415 |                                                                                                                                                                                                              | Null                    | 7.16E-09  |
| gi 470111572 | PREDICTED: E3 SUMO-protein ligase MMS21-like [Fragaria vesca subsp. vesca]                                                                                                                                   | binding                 | 5.91E-58  |
| gi 470111832 | PREDICTED: agamous-like MADS-box protein AGL62-like [Fragaria vesca subsp. vesca]                                                                                                                            | Null                    | 5.13E-14  |
| gi 470112000 | PREDICTED: phospholipid--sterol O-acyltransferase-like [Fragaria vesca subsp. vesca]                                                                                                                         | single-organism process | 0         |
| gi 470112161 | PREDICTED: niemann-Pick C1 protein-like [Fragaria vesca subsp. vesca]                                                                                                                                        | receptor activity       | 0         |
| gi 470112557 | PREDICTED: uncharacterized protein LOC101304542 [Fragaria vesca subsp. vesca]                                                                                                                                | Null                    | 3.01E-10  |
| gi 470112626 | PREDICTED: SKP1-interacting partner 15-like [Fragaria vesca subsp. vesca]                                                                                                                                    | binding                 | 3.39E-32  |
| gi 470113467 | PREDICTED: uncharacterized protein LOC101308350 [Fragaria vesca subsp. vesca]                                                                                                                                | Null                    | 0         |
| gi 470113876 | PREDICTED: uncharacterized protein LOC101310963 [Fragaria vesca subsp. vesca]                                                                                                                                | Null                    | 6.43E-117 |
| gi 470114493 | PREDICTED: uncharacterized protein LOC101314729 [Fragaria vesca subsp. vesca]                                                                                                                                | binding                 | 0         |
| gi 470114978 | PREDICTED: serine/threonine-protein kinase CBK1-like [Fragaria vesca subsp. vesca]                                                                                                                           | binding                 | 6.83E-177 |
| gi 470115141 | PREDICTED: mediator of RNA polymerase II transcription subunit 15a-like [Fragaria vesca subsp. vesca]                                                                                                        | cellular process        | 1.60E-98  |

|              |                                                                                                                    |                       |          |
|--------------|--------------------------------------------------------------------------------------------------------------------|-----------------------|----------|
| gi 470115548 | PREDICTED: probable LRR receptor-like serine/threonine-protein kinase At2g24230-like [Fragaria vesca subsp. vesca] | catalytic activity    | 3.11E-21 |
| gi 470115822 | PREDICTED: cyclin-T1-3-like [Fragaria vesca subsp. vesca]                                                          | Null                  | 0        |
| gi 470115985 | PREDICTED: bidirectional sugar transporter SWEET2-like [Fragaria vesca subsp. vesca]                               | membrane part         | 7.48E-80 |
| gi 470116593 | PREDICTED: zinc finger CCCH domain-containing protein 18-like [Fragaria vesca subsp. vesca]                        | catalytic activity    | 1.52E-57 |
| gi 470117274 | PREDICTED: rab3 GTPase-activating protein catalytic subunit-like [Fragaria vesca subsp. vesca]                     | cell                  | 0        |
| gi 470117847 | PREDICTED: probable prefoldin subunit 3-like isoform 1 [Fragaria vesca subsp. vesca]                               | cell                  | 7.25E-95 |
| gi 470118066 | PREDICTED: omega-6 fatty acid desaturase, endoplasmic reticulum isozyme 2-like [Fragaria vesca subsp. vesca]       | catalytic activity    | 0        |
| gi 470118132 | PREDICTED: uncharacterized protein LOC101294639 [Fragaria vesca subsp. vesca]                                      | Null                  | 5.43E-10 |
| gi 470118839 | PREDICTED: peroxidase 7-like [Fragaria vesca subsp. vesca]                                                         | antioxidant activity  | 0        |
| gi 470118983 | PREDICTED: uncharacterized protein LOC101293382 [Fragaria vesca subsp. vesca]                                      | Null                  | 0        |
| gi 470119045 | PREDICTED: CASP-like protein POPTRDRAFT_810994-like [Fragaria vesca subsp. vesca]                                  | Null                  | 1.05E-42 |
| gi 470119329 | PREDICTED: alternative NAD(P)H dehydrogenase 2, mitochondrial-like [Fragaria vesca subsp. vesca]                   | catalytic activity    | 0        |
| gi 470119480 | PREDICTED: 1,4-alpha-glucan-branching enzyme 3, chloroplastic/amyloplastic-like [Fragaria vesca subsp. vesca]      | cell                  | 0        |
| gi 470120335 | PREDICTED: uncharacterized protein LOC101294161 [Fragaria vesca subsp. vesca]                                      | Null                  | 6.67E-15 |
| gi 470120371 | PREDICTED: uncharacterized protein LOC101301378 [Fragaria vesca subsp. vesca]                                      | Null                  | 1.08E-95 |
| gi 470120412 | PREDICTED: pentatricopeptide repeat-containing protein At1g63130, mitochondrial-like [Fragaria vesca subsp. vesca] | Null                  | 1.71E-38 |
| gi 470120476 | PREDICTED: cellulose synthase-like protein E1-like [Fragaria vesca subsp. vesca]                                   | membrane              | 0        |
| gi 470120826 | PREDICTED: uncharacterized protein LOC101293768 [Fragaria vesca subsp. vesca]                                      | cell                  | 6.72E-47 |
| gi 470120882 | PREDICTED: uncharacterized protein LOC101302153 [Fragaria vesca subsp. vesca]                                      | cell                  | 0        |
| gi 470121136 | PREDICTED: uncharacterized protein LOC101292007 [Fragaria vesca subsp. vesca]                                      | Null                  | 0        |
| gi 470121443 | PREDICTED: squamosa promoter-binding-like protein 7-like [Fragaria vesca subsp. vesca]                             | biological regulation | 0        |
| gi 470121947 | PREDICTED: pentatricopeptide repeat-containing protein At5g18950-like [Fragaria vesca subsp. vesca]                | Null                  | 3.28E-07 |

|              |                                                                                                |                      |           |
|--------------|------------------------------------------------------------------------------------------------|----------------------|-----------|
| gi 470122093 | PREDICTED: squamosa promoter-binding-like protein 12-like [Fragaria vesca subsp. vesca]        | Null                 | 0         |
| gi 470122923 | PREDICTED: protein MEI2-like 4-like [Fragaria vesca subsp. vesca]                              | binding              | 0         |
| gi 470122977 | PREDICTED: RNA pseudourine synthase 7-like [Fragaria vesca subsp. vesca]                       | catalytic activity   | 1.07E-178 |
| gi 470123353 | PREDICTED: phospholipid-transporting ATPase 3-like [Fragaria vesca subsp. vesca]               | binding              | 0         |
| gi 470123448 | PREDICTED: uncharacterized protein YpgQ-like [Fragaria vesca subsp. vesca]                     | catalytic activity   | 6.08E-115 |
| gi 470123487 | PREDICTED: pre-mRNA-processing protein 40C-like [Fragaria vesca subsp. vesca]                  | binding              | 0         |
| gi 470123941 | PREDICTED: uncharacterized protein LOC101305167 [Fragaria vesca subsp. vesca]                  | Null                 | 6.36E-145 |
| gi 470124027 | PREDICTED: sulfate transporter 3.1-like [Fragaria vesca subsp. vesca]                          | transporter activity | 6.10E-19  |
| gi 470124060 | PREDICTED: uncharacterized protein LOC101304182 [Fragaria vesca subsp. vesca]                  | Null                 | 0         |
| gi 470124141 | PREDICTED: uncharacterized protein LOC101298599 [Fragaria vesca subsp. vesca]                  | Null                 | 1.21E-23  |
| gi 470124193 | PREDICTED: CASP-like protein 6-like [Fragaria vesca subsp. vesca]                              | Null                 | 2.20E-10  |
| gi 470124363 | PREDICTED: putative ribonuclease H protein At1g65750-like [Fragaria vesca subsp. vesca]        | Null                 | 2.50E-35  |
| gi 470124647 | PREDICTED: importin-9-like [Fragaria vesca subsp. vesca]                                       | localization         | 0         |
| gi 470125065 | PREDICTED: F-box/kelch-repeat protein At3g06240-like [Fragaria vesca subsp. vesca]             | Null                 | 0         |
| gi 470125132 | PREDICTED: uncharacterized protein LOC101298513 [Fragaria vesca subsp. vesca]                  | Null                 | 0         |
| gi 470125487 | PREDICTED: SPX domain-containing membrane protein At4g22990-like [Fragaria vesca subsp. vesca] | localization         | 0         |
| gi 470125561 | PREDICTED: uncharacterized protein LOC101297726 [Fragaria vesca subsp. vesca]                  | Null                 | 6.48E-07  |
| gi 470125778 | PREDICTED: protein SPA1-RELATED 2-like [Fragaria vesca subsp. vesca]                           | cell                 | 0         |
| gi 470126429 | PREDICTED: callose synthase 10-like [Fragaria vesca subsp. vesca]                              | Null                 | 0         |
| gi 470127533 | PREDICTED: universal stress protein A-like protein-like [Fragaria vesca subsp. vesca]          | response to stimulus | 4.65E-73  |
| gi 470127670 | PREDICTED: ABC transporter I family member 17-like [Fragaria vesca subsp. vesca]               | binding              | 4.37E-130 |
| gi 470127956 | PREDICTED: L-ascorbate oxidase-like [Fragaria vesca subsp. vesca]                              | Null                 | 7.87E-122 |
| gi 470127997 | PREDICTED: phosphatidylinositol 4-phosphate 5-kinase 8-like [Fragaria vesca subsp. vesca]      | binding              | 0         |
| gi 470128047 | PREDICTED: mitogen-activated protein kinase kinase kinase 1-like [Fragaria vesca subsp. vesca] | binding              | 3.66E-158 |
| gi 470128218 | PREDICTED: tuftelin-interacting protein 11-like [Fragaria vesca subsp. vesca]                  | Null                 | 3.90E-20  |
| gi 470128576 | PREDICTED: uncharacterized protein LOC101299868 [Fragaria vesca subsp. vesca]                  | catalytic activity   | 9.37E-145 |

|              |                                                                                                      |                        |           |
|--------------|------------------------------------------------------------------------------------------------------|------------------------|-----------|
| gi 470128592 | PREDICTED: uncharacterized protein LOC101302362 [Fragaria vesca subsp. vesca]                        | membrane part          | 2.40E-112 |
| gi 470128687 | PREDICTED: uncharacterized protein LOC101292215 [Fragaria vesca subsp. vesca]                        | Null                   | 4.96E-40  |
| gi 470129551 | PREDICTED: serine/threonine-protein kinase PBS1-like [Fragaria vesca subsp. vesca]                   | binding                | 3.37E-130 |
| gi 470130900 | PREDICTED: uncharacterized protein LOC101299872 [Fragaria vesca subsp. vesca]                        | Null                   | 4.42E-39  |
| gi 470131227 | PREDICTED: ATP-dependent DNA helicase Q-like 4A-like [Fragaria vesca subsp. vesca]                   | response to stimulus   | 0         |
| gi 470131247 | PREDICTED: anaphase-promoting complex subunit 2-like [Fragaria vesca subsp. vesca]                   | cell                   | 0         |
| gi 470131291 | PREDICTED: purple acid phosphatase 23-like [Fragaria vesca subsp. vesca]                             | catalytic activity     | 0         |
| gi 470131344 | PREDICTED: uncharacterized protein LOC101305082 [Fragaria vesca subsp. vesca]                        | Null                   | 0         |
| gi 470131363 | PREDICTED: putative ribonuclease H protein At1g65750-like [Fragaria vesca subsp. vesca]              | Null                   | 2.04E-154 |
| gi 470131673 | PREDICTED: ATP synthase subunit delta', mitochondrial-like [Fragaria vesca subsp. vesca]             | macromolecular complex | 9.77E-95  |
| gi 470131796 | PREDICTED: putative F-box protein At1g67390-like [Fragaria vesca subsp. vesca]                       | Null                   | 0         |
| gi 470132062 | PREDICTED: uncharacterized protein LOC101293797 [Fragaria vesca subsp. vesca]                        | Null                   | 1.49E-47  |
| gi 470132102 | PREDICTED: uncharacterized protein LOC101300455 [Fragaria vesca subsp. vesca]                        | Null                   | 0         |
| gi 470132228 | PREDICTED: decapping 5-like protein-like [Fragaria vesca subsp. vesca]                               | Null                   | 0         |
| gi 470132258 | PREDICTED: WD repeat-containing protein 48 homolog [Fragaria vesca subsp. vesca]                     | catalytic activity     | 0         |
| gi 470133347 | PREDICTED: regulatory-associated protein of TOR 1-like [Fragaria vesca subsp. vesca]                 | growth                 | 0         |
| gi 470134024 | PREDICTED: uncharacterized protein LOC101304108 [Fragaria vesca subsp. vesca]                        | Null                   | 0         |
| gi 470134504 | PREDICTED: serine/threonine-protein kinase-like protein At3g51990-like [Fragaria vesca subsp. vesca] | binding                | 0         |
| gi 470134516 | PREDICTED: GTP-binding protein TypA/BipA homolog [Fragaria vesca subsp. vesca]                       | catalytic activity     | 2.46E-115 |
| gi 470134556 | PREDICTED: transcription activator GLK1-like [Fragaria vesca subsp. vesca]                           | Null                   | 0         |
| gi 470134558 | PREDICTED: serine carboxypeptidase-like 40-like [Fragaria vesca subsp. vesca]                        | catalytic activity     | 0         |
| gi 470135119 | PREDICTED: protein RRP5 homolog [Fragaria vesca subsp. vesca]                                        | organelle part         | 0         |
| gi 470135695 | PREDICTED: uncharacterized protein At2g41620-like [Fragaria vesca subsp. vesca]                      | organelle part         | 0         |
| gi 470136327 | PREDICTED: probable S-acyltransferase At4g15080-like [Fragaria vesca subsp. vesca]                   | membrane               | 0         |
| gi 470136500 | PREDICTED: cyclin-G-associated kinase-like [Fragaria vesca subsp. vesca]                             | multi-organism process | 9.14E-167 |



|              |                                                                                                          |                                                           |           |
|--------------|----------------------------------------------------------------------------------------------------------|-----------------------------------------------------------|-----------|
| gi 470137167 | PREDICTED: LOW QUALITY PROTEIN: ABC transporter A family member 1-like [Fragaria vesca subsp. vesca]     | binding                                                   | 2.70E-74  |
| gi 470137560 | PREDICTED: transcription factor TCP20-like [Fragaria vesca subsp. vesca]                                 | Null                                                      | 3.34E-117 |
| gi 470137699 | PREDICTED: uncharacterized protein LOC101313912 [Fragaria vesca subsp. vesca]                            | cellular process<br>cellular component<br>organization or | 0         |
| gi 470138030 | PREDICTED: PHD finger protein MALE MEIOCYTE DEATH 1-like [Fragaria vesca subsp. vesca]                   | biogenesis                                                | 0         |
| gi 470139380 | PREDICTED: double-stranded RNA-binding protein 1-like [Fragaria vesca subsp. vesca]                      | Null                                                      | 1.61E-06  |
| gi 470139591 | PREDICTED: E3 ubiquitin-protein ligase SINAT2-like [Fragaria vesca subsp. vesca]                         | catalytic activity                                        | 4.95E-143 |
| gi 470139593 | PREDICTED: probable protein kinase At2g41970-like [Fragaria vesca subsp. vesca]                          | binding                                                   | 0         |
| gi 470139694 | PREDICTED: uncharacterized protein LOC101301607 [Fragaria vesca subsp. vesca]                            | Null                                                      | 0         |
| gi 470139948 | PREDICTED: cytokinin dehydrogenase 1-like [Fragaria vesca subsp. vesca]                                  | binding                                                   | 0         |
| gi 470139954 | PREDICTED: probable sugar phosphate/phosphate translocator At3g10290-like [Fragaria vesca subsp. vesca]  | membrane part                                             | 3.08E-93  |
| gi 470140611 | PREDICTED: tricyclene synthase EBOS, chloroplastic-like [Fragaria vesca subsp. vesca]                    | cell                                                      | 0         |
| gi 470140857 | PREDICTED: uncharacterized protein LOC101301323 [Fragaria vesca subsp. vesca]                            | binding                                                   | 1.48E-18  |
| gi 470140965 | PREDICTED: cytoplasmic tRNA 2-thiolation protein 2-like [Fragaria vesca subsp. vesca]                    | Null                                                      | 0         |
| gi 470141148 | PREDICTED: F-box/kelch-repeat protein At3g23880-like [Fragaria vesca subsp. vesca]                       | Null                                                      | 5.43E-15  |
| gi 470141526 | PREDICTED: major facilitator superfamily domain-containing protein 12-like [Fragaria vesca subsp. vesca] | Null                                                      | 1.19E-38  |
| gi 470141550 | PREDICTED: callose synthase 2-like [Fragaria vesca subsp. vesca]                                         | membrane                                                  | 0         |
| gi 470141620 | PREDICTED: thylakoid lumenal 19 kDa protein, chloroplastic-like [Fragaria vesca subsp. vesca]            | cell                                                      | 3.13E-71  |
| gi 470141927 | PREDICTED: histone-lysine N-methyltransferase ATX3-like [Fragaria vesca subsp. vesca]                    | catalytic activity<br>multicellular organismal            | 0         |
| gi 470143095 | PREDICTED: cytochrome b5 reductase 4-like [Fragaria vesca subsp. vesca]                                  | process                                                   | 3.91E-97  |
| gi 470143162 | PREDICTED: rac-like GTP-binding protein 7-like [Fragaria vesca subsp. vesca]                             | cell                                                      | 1.97E-58  |
| gi 470143700 | PREDICTED: protein kinase APK1B, chloroplastic-like [Fragaria vesca subsp. vesca]                        | Null                                                      | 2.48E-18  |

|               |                                                                                                                  |  |                    |           |
|---------------|------------------------------------------------------------------------------------------------------------------|--|--------------------|-----------|
|               | PREDICTED: G-type lectin S-receptor-like serine/threonine-protein kinase B120-like [Fragaria vesca subsp. vesca] |  | catalytic activity | 1.42E-37  |
| gi 470145221  | vesca]                                                                                                           |  | cell               | 0         |
| gi 470145936  | PREDICTED: beta-galactosidase-like [Fragaria vesca subsp. vesca]                                                 |  | Null               | 1.25E-59  |
| gi 470146022  | PREDICTED: uncharacterized protein LOC101315004 [Fragaria vesca subsp. vesca]                                    |  | catalytic activity | 0         |
| gi 470146095  | PREDICTED: DNA-directed RNA polymerase III subunit RPC2-like [Fragaria vesca subsp. vesca]                       |  | Null               | 9.58E-11  |
| gi 470146181  | PREDICTED: putative ribonuclease H protein At1g65750-like [Fragaria vesca subsp. vesca]                          |  | Null               | 0         |
| gi 470146700  | PREDICTED: cation/H(+) antiporter 15-like [Fragaria vesca subsp. vesca]                                          |  |                    |           |
|               | PREDICTED: LOW QUALITY PROTEIN: ferric reduction oxidase 4-like, partial [Fragaria vesca subsp. vesca]           |  | binding            | 1.59E-18  |
| gi 470147163  | vesca]                                                                                                           |  | Null               | 1.21E-100 |
| gi 470147363  | PREDICTED: NAC transcription factor ONAC010-like [Fragaria vesca subsp. vesca]                                   |  |                    |           |
|               | PREDICTED: LOW QUALITY PROTEIN: probable aspartyl aminopeptidase-like [Fragaria vesca subsp. vesca]              |  | cell               | 1.48E-62  |
| gi 470147736  | vesca]                                                                                                           |  | binding            | 0         |
| gi 470148182  | PREDICTED: helicase protein MOM1-like [Fragaria vesca subsp. vesca]                                              |  |                    |           |
|               | PREDICTED: LOW QUALITY PROTEIN: CBS domain-containing protein CBSCBSPB3-like [Fragaria vesca subsp. vesca]       |  | Null               | 0         |
| gi 470148343  | vesca subsp. vesca]                                                                                              |  | Null               | 7.47E-43  |
| gi 470148479  | PREDICTED: enzymatic polyprotein-like [Fragaria vesca subsp. vesca]                                              |  | binding            | 0         |
| gi 470148519  | PREDICTED: F-box protein SKIP16-like [Fragaria vesca subsp. vesca]                                               |  | Null               | 0         |
| gi 470148781  | PREDICTED: uncharacterized protein LOC101304245 [Fragaria vesca subsp. vesca]                                    |  | Null               | 3.68E-12  |
| gi 62319939   | hypothetical protein [Arabidopsis thaliana]                                                                      |  |                    |           |
| fan-novel-008 | no target in F.vesca                                                                                             |  |                    |           |
| fan-novel-009 | no target in F.vesca                                                                                             |  |                    |           |
| fan-novel-010 | gi 24461860 CTV.20 [Citrus trifoliata]                                                                           |  | Null               | 3.90E-08  |
|               | gi 470142145 PREDICTED: probable aquaporin PIP1-4-like [Fragaria vesca subsp. vesca]                             |  | cell               | 2.92E-158 |
|               | gi 470146285 PREDICTED: monocopper oxidase-like protein SKU5-like [Fragaria vesca subsp. vesca]                  |  | binding            | 0         |
| fan-novel-011 | no target in F.vesca                                                                                             |  |                    |           |
| fan-novel-012 | gi 470116204 PREDICTED: acyl-coenzyme A thioesterase 13-like [Fragaria vesca subsp. vesca]                       |  | Null               | 2.10E-82  |

|               |               |                                                                                                     |                                                                                                                    |           |   |
|---------------|---------------|-----------------------------------------------------------------------------------------------------|--------------------------------------------------------------------------------------------------------------------|-----------|---|
| fan-novel-013 | gi 470105088  | PREDICTED: replication protein A 70 kDa DNA-binding subunit-like [Fragaria vesca subsp. vesca]      | Null                                                                                                               | 9.69E-98  |   |
|               | gi 470118068  | PREDICTED: uncharacterized protein LOC101309521 [Fragaria vesca subsp. vesca]                       | Null                                                                                                               | 0         |   |
|               | gi 470124410  | PREDICTED: TMV resistance protein N-like [Fragaria vesca subsp. vesca]                              | binding                                                                                                            | 8.89E-63  |   |
|               | gi 470124412  | PREDICTED: leucine-rich repeat protein soc-2 homolog [Fragaria vesca subsp. vesca]                  | Null                                                                                                               | 0         |   |
|               | gi 470147937  | PREDICTED: casein kinase I-like [Fragaria vesca subsp. vesca]                                       | binding                                                                                                            | 0         |   |
| fan-novel-014 | gi 462404060  | hypothetical protein PRUPE_ppa000373mg [Prunus persica]                                             | localization                                                                                                       | 0         |   |
|               | gi 470112426  | PREDICTED: zinc finger CCCH domain-containing protein 19-like [Fragaria vesca subsp. vesca]         | Null                                                                                                               | 0         |   |
|               | gi 470126453  | PREDICTED: DNA replication licensing factor mcm2-like [Fragaria vesca subsp. vesca]                 | binding                                                                                                            | 0         |   |
|               | gi 470133161  | PREDICTED: root phototropism protein 3-like [Fragaria vesca subsp. vesca]                           | Null                                                                                                               | 6.39E-142 |   |
|               | gi 470138821  | PREDICTED: putative disease resistance protein RGA1-like [Fragaria vesca subsp. vesca]              | Null                                                                                                               | 0         |   |
|               | gi 470139011  | PREDICTED: putative disease resistance protein RGA3-like [Fragaria vesca subsp. vesca]              | Null                                                                                                               | 0         |   |
|               | gi 470141018  | PREDICTED: putative disease resistance protein RGA3-like [Fragaria vesca subsp. vesca]              | Null                                                                                                               | 0         |   |
| fan-novel-015 | gi 470105114  | PREDICTED: DNA ligase 1-like [Fragaria vesca subsp. vesca]                                          | response to stimulus                                                                                               | 2.05E-47  |   |
|               | gi 470109667  | PREDICTED: UDP-glucuronate:xylan alpha-glucuronosyltransferase 2-like [Fragaria vesca subsp. vesca] | cell                                                                                                               | 0         |   |
| fan-novel-016 | gi 462423111  | hypothetical protein PRUPE_ppa015437mg, partial [Prunus persica]                                    | Null                                                                                                               | 8.92E-07  |   |
| fan-novel-017 | gi 470105088  | PREDICTED: replication protein A 70 kDa DNA-binding subunit-like [Fragaria vesca subsp. vesca]      | Null                                                                                                               | 9.69E-98  |   |
|               | gi 470105935  | PREDICTED: TMV resistance protein N-like [Fragaria vesca subsp. vesca]                              | Null                                                                                                               | 0         |   |
|               | gi 470105945  | PREDICTED: protein SUPPRESSOR OF npr1-1, CONSTITUTIVE 1-like [Fragaria vesca subsp. vesca]          | Null                                                                                                               | 0         |   |
|               | gi 470108366  | PREDICTED: phytosulfokine receptor 2-like [Fragaria vesca subsp. vesca]                             | binding                                                                                                            | 0         |   |
|               | gi 470113037  | PREDICTED: chalcone synthase 1-like [Fragaria vesca subsp. vesca]                                   | cellular process                                                                                                   | 0         |   |
|               | gi 470118007  | PREDICTED: serine/threonine-protein kinase TOUSLED-like [Fragaria vesca subsp. vesca]               | cell                                                                                                               | 0         |   |
|               | gi 470119003  | PREDICTED: protein lap4-like [Fragaria vesca subsp. vesca]                                          | cell                                                                                                               | 0         |   |
|               | gi 470124410  | PREDICTED: TMV resistance protein N-like [Fragaria vesca subsp. vesca]                              | cell                                                                                                               | 0         |   |
|               | gi 470124412  | PREDICTED: leucine-rich repeat protein soc-2 homolog [Fragaria vesca subsp. vesca]                  | Null                                                                                                               | 0         |   |
|               | fan-novel-018 | gi 470119338                                                                                        | PREDICTED: pentatricopeptide repeat-containing protein At1g12300, mitochondrial-like [Fragaria vesca subsp. vesca] | Null      | 0 |
|               |               |                                                                                                     | subsp. vesca]                                                                                                      | Null      | 0 |

|               |                             |                                                                                                             |         |           |
|---------------|-----------------------------|-------------------------------------------------------------------------------------------------------------|---------|-----------|
| fan-novel-019 | no target in <i>F.vesca</i> |                                                                                                             |         |           |
| fan-novel-020 | gi 470128495                | PREDICTED: disease resistance protein RPM1-like [ <i>Fragaria vesca</i> subsp. <i>vesca</i> ]               | Null    | 0         |
|               | gi 470140800                | PREDICTED: putative disease resistance protein RGA3-like [ <i>Fragaria vesca</i> subsp. <i>vesca</i> ]      | Null    | 0         |
|               | gi 470140824                | PREDICTED: putative disease resistance protein RGA3-like [ <i>Fragaria vesca</i> subsp. <i>vesca</i> ]      | Null    | 0         |
|               | gi 470147333                | PREDICTED: putative disease resistance protein At3g14460-like [ <i>Fragaria vesca</i> subsp. <i>vesca</i> ] | Null    | 9.60E-167 |
| fan-novel-021 | gi 462412288                | hypothetical protein PRUPE_ppa014994mg, partial [ <i>Prunus persica</i> ]                                   | Null    | 3.55E-17  |
|               | gi 470128501                | PREDICTED: disease resistance protein RPM1-like isoform 1 [ <i>Fragaria vesca</i> subsp. <i>vesca</i> ]     | binding | 0         |
|               | gi 470130928                | PREDICTED: TMV resistance protein N-like [ <i>Fragaria vesca</i> subsp. <i>vesca</i> ]                      | Null    | 0         |
|               | gi 470131535                | PREDICTED: disease resistance protein RPM1-like [ <i>Fragaria vesca</i> subsp. <i>vesca</i> ]               | binding | 0         |
|               | gi 470131568                | PREDICTED: disease resistance protein RPM1-like [ <i>Fragaria vesca</i> subsp. <i>vesca</i> ]               | binding | 0         |
|               | gi 470133068                | PREDICTED: protein RALF-like 33-like isoform 2 [ <i>Fragaria vesca</i> subsp. <i>vesca</i> ]                | Null    | 3.44E-43  |
|               | gi 470146236                | PREDICTED: DNA repair helicase XPB2-like [ <i>Fragaria vesca</i> subsp. <i>vesca</i> ]                      | Null    | 3.77E-06  |
| fan-novel-022 | gi 470110018                | PREDICTED: F-box protein CPR30-like [ <i>Fragaria vesca</i> subsp. <i>vesca</i> ]                           | Null    | 0         |
|               | gi 470113332                | PREDICTED: F-box protein CPR30-like [ <i>Fragaria vesca</i> subsp. <i>vesca</i> ]                           | Null    | 0         |
|               | gi 470120096                | PREDICTED: F-box/kelch-repeat protein At3g06240-like [ <i>Fragaria vesca</i> subsp. <i>vesca</i> ]          | Null    | 1.03E-26  |
|               | gi 470120240                | PREDICTED: F-box/kelch-repeat protein At3g06240-like [ <i>Fragaria vesca</i> subsp. <i>vesca</i> ]          | Null    | 0         |
|               | gi 470120242                | PREDICTED: putative F-box protein At1g33530-like [ <i>Fragaria vesca</i> subsp. <i>vesca</i> ]              | Null    | 1.83E-116 |
|               | gi 470124780                | PREDICTED: F-box protein CPR30-like [ <i>Fragaria vesca</i> subsp. <i>vesca</i> ]                           | Null    | 0         |
|               | gi 470132776                | PREDICTED: uncharacterized protein LOC101292514 [ <i>Fragaria vesca</i> subsp. <i>vesca</i> ]               | Null    | 4.33E-91  |
|               | gi 470133967                | PREDICTED: F-box/kelch-repeat protein At3g06240-like [ <i>Fragaria vesca</i> subsp. <i>vesca</i> ]          | Null    | 0         |
|               | gi 470138987                | PREDICTED: F-box protein CPR30-like [ <i>Fragaria vesca</i> subsp. <i>vesca</i> ]                           | Null    | 0         |
| fan-novel-023 | gi 470110018                | PREDICTED: F-box protein CPR30-like [ <i>Fragaria vesca</i> subsp. <i>vesca</i> ]                           | Null    | 0         |
|               | gi 470113332                | PREDICTED: F-box protein CPR30-like [ <i>Fragaria vesca</i> subsp. <i>vesca</i> ]                           | Null    | 0         |
|               | gi 470113334                | PREDICTED: F-box protein CPR30-like [ <i>Fragaria vesca</i> subsp. <i>vesca</i> ]                           | Null    | 0         |
|               | gi 470113336                | PREDICTED: F-box protein CPR30-like [ <i>Fragaria vesca</i> subsp. <i>vesca</i> ]                           | Null    | 0         |
|               | gi 470120240                | PREDICTED: F-box/kelch-repeat protein At3g06240-like [ <i>Fragaria vesca</i> subsp. <i>vesca</i> ]          | Null    | 0         |

|               |              |                                                                                                                   |                     |           |
|---------------|--------------|-------------------------------------------------------------------------------------------------------------------|---------------------|-----------|
|               | gi 470120242 | PREDICTED: putative F-box protein At1g33530-like [Fragaria vesca subsp. vesca]                                    | Null                | 1.83E-116 |
|               | gi 470124780 | PREDICTED: F-box protein CPR30-like [Fragaria vesca subsp. vesca]                                                 | Null                | 0         |
|               | gi 470125267 | PREDICTED: TIMELESS-interacting protein-like [Fragaria vesca subsp. vesca]                                        | binding             | 2.40E-129 |
|               |              | PREDICTED: putative pentatricopeptide repeat-containing protein At5g47460-like [Fragaria vesca subsp. vesca]      | Null                | 0         |
|               | gi 470130608 |                                                                                                                   | Null                | 0         |
|               | gi 470133965 | PREDICTED: F-box/kelch-repeat protein At3g06240-like [Fragaria vesca subsp. vesca]                                | Null                | 0         |
|               | gi 470133967 | PREDICTED: F-box/kelch-repeat protein At3g06240-like [Fragaria vesca subsp. vesca]                                | Null                | 0         |
|               | gi 470138983 | PREDICTED: F-box protein CPR30-like [Fragaria vesca subsp. vesca]                                                 | Null                | 0         |
|               | gi 470138987 | PREDICTED: F-box protein CPR30-like [Fragaria vesca subsp. vesca]                                                 | Null                | 0         |
|               | gi 470138995 | PREDICTED: F-box protein CPR30-like [Fragaria vesca subsp. vesca]                                                 | Null                | 0         |
|               | gi 470138997 | PREDICTED: F-box protein CPR30-like [Fragaria vesca subsp. vesca]                                                 | Null                | 0         |
|               | gi 470139003 | PREDICTED: F-box protein CPR30-like [Fragaria vesca subsp. vesca]                                                 | Null                | 4.08E-174 |
|               | gi 470139005 | PREDICTED: uncharacterized protein LOC101302966 [Fragaria vesca subsp. vesca]                                     | Null                | 4.26E-69  |
|               |              |                                                                                                                   | structural molecule |           |
| fan-novel-024 | gi 449446564 | PREDICTED: 40S ribosomal protein S30-like isoform 1 [Cucumis sativus]                                             | activity            | 5.98E-22  |
|               | gi 470113815 | PREDICTED: pentatricopeptide repeat-containing protein At2g22070-like [Fragaria vesca subsp. vesca]               | Null                | 0         |
|               | gi 470122372 | PREDICTED: squamosa promoter-binding-like protein 6-like [Fragaria vesca subsp. vesca]                            | Null                | 0         |
|               | gi 470123009 | PREDICTED: squamosa promoter-binding-like protein 13A-like [Fragaria vesca subsp. vesca]                          | Null                | 0         |
|               | gi 470126622 | PREDICTED: uncharacterized protein LOC101306334 [Fragaria vesca subsp. vesca]                                     | Null                | 0         |
|               |              | PREDICTED: probable leucine-rich repeat receptor-like protein kinase At5g63930-like [Fragaria vesca subsp. vesca] |                     |           |
|               | gi 470129652 |                                                                                                                   | membrane            | 0         |
|               | gi 470137245 | PREDICTED: squamosa promoter-binding-like protein 17-like [Fragaria vesca subsp. vesca]                           | Null                | 0         |
|               | gi 470137555 | PREDICTED: squamosa promoter-binding-like protein 13A-like [Fragaria vesca subsp. vesca]                          | Null                | 0         |
|               | gi 470138782 | PREDICTED: putative ribonuclease H protein At1g65750-like [Fragaria vesca subsp. vesca]                           | Null                | 1.02E-153 |
|               | gi 470142120 | PREDICTED: uncharacterized protein LOC101294106 [Fragaria vesca subsp. vesca]                                     | organelle part      | 2.00E-145 |
|               | gi 470145723 | PREDICTED: squamosa promoter-binding-like protein 7-like [Fragaria vesca subsp. vesca]                            | Null                | 6.24E-77  |

|               |                      |                                                                                                                             |                    |           |
|---------------|----------------------|-----------------------------------------------------------------------------------------------------------------------------|--------------------|-----------|
|               | gi 470149113         | PREDICTED: squamosa promoter-binding-like protein 12-like [Fragaria vesca subsp. vesca]                                     | Null               | 0         |
|               | gi 470149134         | PREDICTED: uncharacterized protein LOC101314819 [Fragaria vesca subsp. vesca]                                               | Null               | 1.18E-158 |
| fan-novel-025 | no target in F.vesca |                                                                                                                             |                    |           |
| fan-novel-026 | gi 470133967         | PREDICTED: F-box/kelch-repeat protein At3g06240-like [Fragaria vesca subsp. vesca]                                          | Null               | 0         |
|               | gi 470138983         | PREDICTED: F-box protein CPR30-like [Fragaria vesca subsp. vesca]                                                           | Null               | 0         |
|               | gi 470139005         | PREDICTED: uncharacterized protein LOC101302966 [Fragaria vesca subsp. vesca]                                               | Null               | 4.26E-69  |
|               | gi 470139796         | PREDICTED: F-box/kelch-repeat protein At3g06240-like [Fragaria vesca subsp. vesca]                                          | Null               | 0         |
| fan-novel-027 | gi 470113332         | PREDICTED: F-box protein CPR30-like [Fragaria vesca subsp. vesca]                                                           | Null               | 0         |
|               | gi 470113336         | PREDICTED: F-box protein CPR30-like [Fragaria vesca subsp. vesca]                                                           | Null               | 0         |
|               | gi 470120096         | PREDICTED: F-box/kelch-repeat protein At3g06240-like [Fragaria vesca subsp. vesca]                                          | Null               | 1.03E-26  |
|               | gi 470120098         | PREDICTED: F-box/kelch-repeat protein At3g06240-like [Fragaria vesca subsp. vesca]                                          | Null               | 1.20E-22  |
|               | gi 470124780         | PREDICTED: F-box protein CPR30-like [Fragaria vesca subsp. vesca]                                                           | Null               | 0         |
|               | gi 470139796         | PREDICTED: F-box/kelch-repeat protein At3g06240-like [Fragaria vesca subsp. vesca]                                          | Null               | 0         |
| fan-novel-028 | gi 470111693         | PREDICTED: receptor-like protein kinase 2-like [Fragaria vesca subsp. vesca]                                                | binding            | 0         |
|               | gi 470114901         | PREDICTED: probable serine/threonine-protein kinase drkB-like isoform 2 [Fragaria vesca subsp. vesca]                       | binding            | 0         |
|               | gi 470118878         | PREDICTED: putative pentatricopeptide repeat-containing protein At1g12700, mitochondrial-like [Fragaria vesca subsp. vesca] | Null               | 0         |
|               | gi 470125059         | PREDICTED: pentatricopeptide repeat-containing protein At1g12300, mitochondrial-like [Fragaria vesca subsp. vesca]          | Null               | 0         |
| fan-novel-029 | gi 470110004         | PREDICTED: uncharacterized protein LOC101306694 [Fragaria vesca subsp. vesca]                                               | Null               | 5.75E-123 |
|               | gi 470131289         | PREDICTED: protein ROS1-like [Fragaria vesca subsp. vesca]                                                                  | catalytic activity | 0         |
| fan-novel-030 | gi 462395657         | hypothetical protein PRUPE_ppa015021mg [Prunus persica]                                                                     | Null               | 9.49E-32  |
| fan-novel-031 | gi 470115874         | PREDICTED: transcription factor TCP4-like [Fragaria vesca subsp. vesca]                                                     | cellular process   | 0         |
|               | gi 470134668         | PREDICTED: transcription factor TCP4-like [Fragaria vesca subsp. vesca]                                                     | Null               | 8.46E-175 |
|               | gi 470140559         | PREDICTED: formimidoyltransferase-cyclodeaminase-like [Fragaria vesca subsp. vesca]                                         | binding            | 4.29E-94  |
|               | gi 470141497         | PREDICTED: transcription factor GAMYB-like [Fragaria vesca subsp. vesca]                                                    | Null               | 0         |

|               |                      |                                                                                                         |                  |           |
|---------------|----------------------|---------------------------------------------------------------------------------------------------------|------------------|-----------|
|               | gi 470143710         | PREDICTED: glucan endo-1,3-beta-glucosidase-like [Fragaria vesca subsp. vesca]                          | binding          | 3.57E-35  |
| fan-novel-032 | gi 470115874         | PREDICTED: transcription factor TCP4-like [Fragaria vesca subsp. vesca]                                 | cellular process | 0         |
|               | gi 470134668         | PREDICTED: transcription factor TCP4-like [Fragaria vesca subsp. vesca]                                 | Null             | 8.46E-175 |
|               | gi 470140559         | PREDICTED: formimidoyltransferase-cyclodeaminase-like [Fragaria vesca subsp. vesca]                     | binding          | 4.29E-94  |
|               | gi 470141497         | PREDICTED: transcription factor GAMYB-like [Fragaria vesca subsp. vesca]                                | Null             | 0         |
| fan-novel-033 | gi 470115874         | PREDICTED: transcription factor TCP4-like [Fragaria vesca subsp. vesca]                                 | cellular process | 0         |
|               | gi 470134668         | PREDICTED: transcription factor TCP4-like [Fragaria vesca subsp. vesca]                                 | Null             | 8.46E-175 |
|               | gi 470141497         | PREDICTED: transcription factor GAMYB-like [Fragaria vesca subsp. vesca]                                | Null             | 0         |
| fan-novel-034 | gi 470112365         | PREDICTED: leucine-rich repeat and death domain-containing protein 1-like [Fragaria vesca subsp. vesca] | Null             | 0         |
|               | gi 470113133         | PREDICTED: 1-aminocyclopropane-1-carboxylate synthase CMA101-like [Fragaria vesca subsp. vesca]         | cellular process | 0         |
|               | gi 470129094         | PREDICTED: probable beta-D-xylosidase 2-like [Fragaria vesca subsp. vesca]                              | cell             | 0         |
|               | gi 470132879         | PREDICTED: GDSL esterase/lipase At1g09390-like [Fragaria vesca subsp. vesca]                            | organelle part   | 2.55E-176 |
| fan-novel-035 | no target in F.vesca |                                                                                                         |                  |           |

---

**Table S6: Primer sequence of miRNA and PIRL**

|                      |                                                                         |                                                                                                                                              |
|----------------------|-------------------------------------------------------------------------|----------------------------------------------------------------------------------------------------------------------------------------------|
| <b>miR166a</b>       | RT-primer                                                               | ctcaactggtgctgctggagtcggcaattcagttgagggggaatg                                                                                                |
|                      | RT-PCR primer                                                           | Forward: acactccagctgggtcggaccagg<br>Reverse: aactggtgctgctggag                                                                              |
|                      | Probe                                                                   | FAM-ttcagttgagggggaatg-TAMRA                                                                                                                 |
| <b>miR167</b>        | RT-primer                                                               | ctcaactggtgctgctggagtcggcaattcagttgagcagatcat                                                                                                |
|                      | RT-PCR primer                                                           | Forward: acactccagctgggtgaagctgcc<br>Reverse: aactggtgctgctggag                                                                              |
|                      | Probe                                                                   | FAM-ttcagttgagtagatcat-TAMRA                                                                                                                 |
| <b>miR5290a</b>      | RT-primer                                                               | ctcaactggtgctgctggagtcggcaattcagttgagcattgtct                                                                                                |
|                      | RT-PCR primer                                                           | Forward: acactccagctgggttgagagag<br>Reverse: aactggtgctgctggag                                                                               |
|                      | Probe                                                                   | FAM-ttcagttgagcattgtct-TAMRA                                                                                                                 |
| <b>fan-novel-018</b> | RT-primer                                                               | ctcaactggtgctgctggagtcggcaattcagttgagaacagtca                                                                                                |
|                      | RT-PCR primer                                                           | Forward: acactccagctgggtctattcaaa<br>Reverse: aactggtgctgctggag                                                                              |
|                      | Probe                                                                   | FAM-ttcagttgagaacagtca-TAMRA                                                                                                                 |
| <b>fan-novel-020</b> | RT-primer                                                               | ctcaactggtgctgctggagtcggcaattcagttgaggggaatggc                                                                                               |
|                      | RT-PCR primer                                                           | Forward: acactccagctgggtctttcttag<br>Reverse: aactggtgctgctggag                                                                              |
|                      | Probe                                                                   | FAM-ttcagttgaggggaatggc-TAMRA                                                                                                                |
| <b>fan-novel-024</b> | RT-primer                                                               | ctcaactggtgctgctggagtcggcaattcagttgaggagctcac                                                                                                |
|                      | RT-PCR primer                                                           | Forward: acactccagctgggtgacagaaga<br>Reverse: aactggtgctgctggag                                                                              |
|                      | Probe                                                                   | FAM-ttcagttgaggagctcac-TAMRA                                                                                                                 |
| <b>26s rRNA</b>      | RT-primer                                                               | oligo d(T), random 9                                                                                                                         |
|                      | RT-PCR primer                                                           | Forward: taaccgcatcaggtctcaa<br>Reverse: ctcgagcagttctccgacag                                                                                |
|                      | Probe                                                                   | ctacattgtccatcgacca                                                                                                                          |
| <b>PIRL</b>          | RT-primer                                                               | oligo dT, random 9                                                                                                                           |
|                      | qRT-PCR primer; Construction of forward fragment of interference vector | Forward: gctctagactgatccgacctcaacaacaaccct<br>Reverse: tccccgggggacgaggtcctcgagcttct                                                         |
|                      | PCR primer                                                              | Forward: ggaattccatgatgatccaacc<br>Reverse: ggggtaccaaactgctgatcaagagc                                                                       |
|                      | mutated PCR                                                             | Forward: caagctcgcctgattgattcgtcgtctgaagaagctcgagga<br>cctcgtcctc<br>Reverse: ggtcctcgacttcttcgacagcgacaatcaatcagggcgagct<br>tggccttggcgggtg |
|                      | Construction of reverse fragment of interference vector                 | Forward: ggggtaccgacgaggtcctcgagcttct<br>Reverse: ggaattcctgatccgacctcaacaacaaccct                                                           |
